# Supplementary material for: Abiotic resource depletion potentials (ADPs) for elements revisited—updating ultimate reserve estimates and introducing time series for production data
Source: Springer Nature journal article supplement (doi:10.1007/s11367-019-01683-x), 2019-10-16
Supplement: MOESM1 [file 17280868]

## Sheet: colofon
			Update of Abiotic Depletion Potentials (ADPs) for elements based on crustal content and yearly productions.
			Version 3.0. date 12 July 2019
			This spreadsheet compiles the data and calculations for the update of characterization and normalization factors for the characterization model on Abiotic Resource Depletion for elements as first described by Guinée & Heijungs (1995) and updated by Oers et al. (2002; 2016)
			The spreadsheet is supplementary material of the technical report 'Update of Abiotic Depletion Potentials (ADPs) for elements based on crustal content and yearly productions'
			authors: Lauran van Oers, Jeroen Guinée and Reinout Heijungs. (2018)
			Institute of Environmental Sciences
			Leiden University (CML)
			Department of Industrial Ecology

## Sheet: content
Content
tab sheet	description of tab sheets
recommended ADP & norm data	This tab sheet summarizes the end result of this update: a) recommended characterization factors for Abiotic Resource Depletion for elements (ADP_elements), based on ultimate reserve and cumulative production over the period 1970-2015 b) extraction totals of elements for the year 2015 and c) the resulting normalization data and category total
characterisation model	a description of the scope and the model of the defined problem of abiotic resource depletion of elements
Basic earth data	Basic earth data are the general data that describe the characteristics of the earth. These characteristics are used in the model to calculate the volume and mass of the earth, ocean and atmosphere. The mass is used together with the data on concentrations of elements in the different compartments crust, ocean and atmosphere to estimate the ultimate reserves, crustal content, oceanic content and …
continental crust composition	In the spreadsheet the tab sheet ‘continental crust composition’ compiles the concentrations of elements in the crust according to Rudnick & Gao (2014) and Lide (1990). For the calculation of the crustal content (ultimate reserves) the concentrations as compiled by Rudnick & Gao (2014) are used. Lacking data are supplemented by data from Lide (1990). This results for the upper earth crust in a co…
Ultimate reserves	Based on the mass of the earth crust, ocean and atmosphere (basic earth data) and the concentration of elements in the compartments crust (Rudnick & Gao, 2014; Lide, 1990), Ocean (Harte, 1988) and atmosphere (Harte, 1988). The ultimate reserve is calculated for crust, ocean and atmosphere. The total ultimate reserve is the sum of the reserves in the different compartments. The reserve of crust is…
minerals to elements matrix	The tab sheet ‘minerals to elements matrix’ describes for some of the minerals for which production data are compiled by either USGS or BGS an average composition in terms of elements. These factors are used to convert data on minerals into data on elements. Many, if not most, of the production data of USGS and some of BGS are given already in tonnes of metals or elements, so in these cases conve…
prod USGS(+BGS) minerals	World production data for elements and minerals are compiled by USGS and BGS. Production data are downloaded for the time series 1900 – 2015 from the USGS website and for the period 1970 – 2016 from the BGS website. The tab sheets ‘prod USGS(+BGS) minerals’ compiles the original production data from USGS with some additional and/or alternative data from BGS.
prod USGS(+BGS) kg element	The tab sheet ‘prod USGS(+BGS) minerals’ present the production data that are used to derive the ADPs. The data are a combination of USGS data (default) and some additional or alternative data from BGS. The USGS data are used by default. However, data are made more complete by adding data on aggregates and clays etc. from BGS (blue marked cells). Also for the Platinum group of metals and Titanium…
a&g (P and R)	Production data of the different elements over the time period 1970 - 2015 are compiled based on USGS and BGS sources. Furthermore, crustal content based reserves for elements are provided.
a&g (ADPs)	ADPs of the different elements over the time period 1970 - 2015 are compiled using different calculation procedures. The ADP characterisation model is used as described in tabsheet 'characterization model'. For the reserve parameter in the equation the crustal content (or ultimate reserve) is used based on Rudnick&Gao (2014) with some few additions from Lide (1990) and Harte (1985). The productio…
a&g (norm. data, year y)	Normalization data and category totals of the different elements over the time period 1970 – 2015 are compiled. The normalization figure for an element in a specific year is the product of the production of the element in that year times the ADP of that year. The sumproduct for all elements in that year is called the category total. In the tabsheet also the relative contribution (%) of the elemen…
a&g (norm. data, year 1999)	Same as above with category total based on P1999.
a&g (norm. data, year 2015)	Same as above with category total based on P2015.
a&g (var ADP)	Calculation of the contribution to variance of individual elements to the category total for all years.
references
appendices
Ecoinvent names	links the recommended ADPs and normalisation data to the names defined in the ecoinvent database
JRC names	links the recommended ADPs and normalisation data to the names defined in the JRC database used to estimate Environmental Footprints of products
elements formula and weights	factors used to convert crustal content data given for some compounds into elements
Rare earth elements production	data used to breakdown rare earth minerals into specific elements
nitrogen flows	overview of nitrogen flows in the environment to calculate the replenishing by denitrification of the nitrogen fixated from air (for example for fertilizer production)
ADP, P, R for analysis	overview of recommended ADPcumulative1970-2015, P2015, normalisation data, ultimate reserve data
Table 3	overview of contribution of elements to the category total for different defined ADPs
Table 3	overview of ADPs and category totals for different defined ADPs
Figure 8	graphs showing the development of ADPs over time for some selected elements
comp ADP & CT old&new	In this tab sheet the recommended ADPs of this update are compared to the previous version of ADPs and category totals (Oers et al., 2016; Oers et al., 2002; Guinée & Heijungs, 1995).

## Sheet: recommended ADP & norm data
recommended ADPs and normalisation data (ADP based on ultimate reserve and cumulative production over period 1970-2015; reference year for normalisation is year 2015)
								reserve: Crustal Content				Rudnick&Gao, 2014)
								production: cumulative over period 1970-2015				USGS (2017)
								reference ADP: antimony
								ADP	production 2015	normalisation data	contribution to category total	category total, world 2015
No.		Name	Sym.	cas no.	group	initial emission or extraction		kg Sb eq/kg	kg/yr	kg Sb eq/yr	%	kg Sb eq/yr
89	*	Actinium	Ac	7440-34-8	element	resources		0	0	0	0	5.87825e+09
13		Aluminium	Al	7429-90-5	element	resources		2.54496e-08	2.49662e+11	6353.81	1.0809e-06
95	*	Americium	Am					0	0	0	0
51		Antimony	Sb	7440-36-0	element	resources		1	142000000	142000000	0.0241568
18		Argon	Ar	7440-37-1	element	resources		0	0	0	0
33		Arsenic	As	7440-38-2	element	resources		0.00236142	27600000	65175.3	1.10875e-05
85	*	Astatine	At					0	0	0	0
56		Barium	Ba	7440-39-3	element	resources		1.43827e-05	4.36028e+09	62712.7	1.06686e-05
97	*	Berkelium	Bk					0	0	0	0
4		Beryllium	Be	7440-41-7	element	resources		7.92746e-05	233500	18.5106	3.149e-09
83		Bismuth	Bi	7440-69-9	element	resources		0.295759	13300000	3.9336e+06	0.000669178
107	*	Bohrium	Bh					0	0	0	0
5		Boron	B	7440-42-8	element	resources		0.00497943	2.9132e+09	1.45061e+07	0.00246776
35		Bromine	Br	7726-95-6	element	resources		0.00154483	568522390	878268	0.00014941
48		Cadmium	Cd	7440-43-9	element	resources		3.63962	23200000	8.44391e+07	0.0143647
20		Calcium	Ca	7440-70-2	element	resources		3.57556e-07	3.1712e+11	113388	1.92895e-05
98	*	Californium	Cf					0	0	0	0
6		Carbon	C	7782-42-5	element	resources		3.20395e-05	1190000000	38127	6.48612e-06
58		Cerium	Ce	7440-45-1	element	resources		1.97777e-05	51382000	1016.22	1.72877e-07
55		Cesium	Cs	7440-46-2	element	resources		0.00193218	5.92985e+07	114575	1.94914e-05
17		Chlorine	Cl	7782-50-5	element	resources		5.34095e-06	1.64396e+11	878030	0.000149369
24		Chromium	Cr	7440-47-3	element	resources		0.000792463	9360000000	7.41745e+06	0.00126185
27		Cobalt	Co	7440-48-4	element	resources		0.000250752	126000000	31594.7	5.37485e-06
29		Copper	Cu	7440-50-8	element	resources		0.0213432	19100000000	4.07654e+08	0.0693496
96	*	Curium	Cm					0	0	0	0
105	*	Dubnium	Db					0	0	0	0
66		Dysprosium	Dy	7429-91-6	element	resources		4.8582e-05	944459	45.8837	7.80567e-09
99	*	Einsteinium	Es					0	0	0	0
68		Erbium	Er	7440-52-0	element	resources		7.533e-05	509333	38.368	6.52712e-09
63		Europium	Eu	7440-53-1	element	resources		0.000290823	371712	108.102	1.83902e-08
100	*	Fermium	Fm					0	0	0	0
9		Fluorine	F	7782-41-4	element	resources		1.29186e-05	3.49416e+09	45139.7	7.67911e-06
87	*	Francium	Fr					0	0	0	0
64		Gadolinium	Gd	7440-54-2	element	resources		6.39968e-05	1.30875e+06	83.7558	1.42484e-08
31		Gallium	Ga	7440-55-3	element	resources		4.21116e-07	469000	0.197504	3.3599e-11
32		Germanium	Ge	7440-56-4	element	resources		7.00506e-05	160000	11.2081	1.90671e-09
79		Gold	Au	7440-57-5	element	resources		1370.74	3100000	4.2493e+09	0.722885
72		Hafnium	Hf	7440-58-6	element	resources		3.91586e-06	72000	0.281942	4.79636e-11
108	*	Hassium	Hs					0	0	0	0
2		Helium	He	7440-59-7	element	resources		0	0	0	0
67		Holmium	Ho	7440-60-0	element	resources		0.000132546	116708	15.4692	2.6316e-09
1		Hydrogen	H	1333-74-0	element	resources		5.77727e-09	8.8211e+09	50.9619	8.66957e-09
49		Indium	In	7440-74-6	element	resources		0.108772	769000	83645.3	1.42296e-05
53		Iodine	I	7553-56-2	element	resources		0.0133345	30600000	408036	6.94145e-05
77		Iridium	Ir	7439-88-5	element	resources		192.094	60.8571	11690.3	1.98873e-06
26		Iron	Fe	7439-89-6	element	resources		6.92445e-07	1.52516e+12	1.05609e+06	0.00017966
36		Krypton	Kr	7439-90-9	element	resources		0	0	0	0
57		Lanthanum	La	7439-91-0	element	resources		2.58687e-05	3.17743e+07	821.958	1.3983e-07
103	*	Lawrencium	Lr					0	0	0	0
82		Lead	Pb	7439-92-1	element	resources		0.0187054	4950000000	9.25917e+07	0.0157516
3		Lithium	Li	7439-93-2	element	resources		2.57475e-05	2.64497e+07	681.015	1.15853e-07
71		Lutetium	Lu	7439-94-3	element	resources		0.00069752	85675.9	59.7607	1.01664e-08
12		Magnesium	Mg	7439-95-4	element	resources		1.74811e-07	5.76876e+10	10084.4	1.71555e-06
25		Manganese	Mn	7439-96-5	element	resources		2.50504e-05	1.75049e+10	438505	7.45978e-05
109	*	Meitnerium	Mt					0	0	0	0
101	*	Mendelevium	Md					0	0	0	0
80		Mercury	Hg	7439-97-6	element	resources		2.70513	3270000	8.84578e+06	0.00150483
42		Molybdenum	Mo	7439-98-7	element	resources		0.173412	235000000	4.07518e+07	0.00693264
60		Neodymium	Nd	7440-00-8	element	resources		2.16481e-05	2.01709e+07	436.663	7.42845e-08
10		Neon	Ne	7440-01-9	element	resources		0	0	0	0
93	*	Neptunium	Np					0	0	0	0
28		Nickel	Ni	7440-02-0	element	resources		0.000814718	2280000000	1.85756e+06	0.000316005
41		Niobium	Nb	7440-03-1	element	resources		0.000286687	64300000	18434	3.13596e-06
7		Nitrogen	N	7727-37-9	element	resources		4.59284e-05	35250000000	1.61898e+06	0.000275418
102	*	Nobelium	No					0	0	0	0
76		Osmium	Os	7440-04-2	element	resources		72.6734	45.7143	3322.21	5.6517e-07
8		Oxygen	O	7782-44-7	element	resources		1.97692e-09	1.44264e+12	2851.98	4.85174e-07
46		Palladium	Pd	7440-05-3	element	resources		965.691	234272	2.26234e+08	0.0384866
15		Phosphorus	P	7723-14-0	element	resources		7.09838e-05	3.26089e+10	2.3147e+06	0.000393774
78		Platinum	Pt	7440-06-4	element	resources		970.947	221053	2.1463e+08	0.0365126
94	*	Plutonium	Pu					0	0	0	0
84	*	Polonium	Po	7440-08-6	element	resources		0	0	0	0
19		Potassium	K	7440-09-7	element	resources		1.32256e-07	9.28311e+10	12277.4	2.08862e-06
59		Praseodymium	Pr	7440-10-0	element	resources		9.68504e-05	6.24017e+06	604.364	1.02814e-07
61	*	Promethium	Pm	???	element	resources		0	0	0	0
91		Protactinium	Pa					0	0	0	0
88	*	Radium	Ra	7440-14-4	element	resources		0	0	0	0
86	*	Radon	Rn	10043-92-2	element	resources		0	0	0	0
75		Rhenium	Re	7440-15-5	element	resources		1045.58	49400	5.16519e+07	0.00878695
45		Rhodium	Rh	7440-16-6	element	resources		0.00283721	1.85714	0.00526911	8.96374e-13
37		Rubidium	Rb	7440-17-7	element	resources		0	0	0	0
44		Ruthenium	Ru	7440-18-8	element	resources		366.074	27700	1.01403e+07	0.00172505
104	*	Rutherfordium	Rf					0	0	0	0
62		Samarium	Sm	7440-19-9	element	resources		7.69373e-05	2.17225e+06	167.127	2.84315e-08
21		Scandium	Sc	7440-20-2	element	resources		7.62267e-08	9779.49	0.000745458	1.26816e-13
106	*	Seaborgium	Sg					0	0	0	0
34		Selenium	Se	7782-49-2	element	resources		0.312252	2200000	686955	0.000116864
14		Silicon	Si	7440-21-3	element	resources		8.1958e-10	1.1199e+11	91.7848	1.56143e-08
47		Silver	Ag	7440-22-4	element	resources		8.64075	25100000	2.16883e+08	0.0368958
11		Sodium	Na	7440-23-5	element	resources		1.65101e-07	1.24875e+11	20617	3.50734e-06
38		Strontium	Sr	7440-24-6	element	resources		1.65855e-06	155335200	257.631	4.38278e-08
16		Sulfur	S	7704-34-9	element	resources		0.000157047	1.20145e+11	1.88684e+07	0.00320987
73		Tantalum	Ta	7440-25-7	element	resources		0.00125785	1170000	1471.69	2.50362e-07
43	*	Technetium	Tc					0	0	0	0
52		Tellurium	Te	13494-80-9	element	resources		170.316	95000	1.618e+07	0.00275252
65		Terbium	Tb	7440-27-9	element	resources		0.000266059	166629	44.3332	7.54191e-09
81		Thallium	Tl	7440-28-0	element	resources		1.92708e-05	10000	0.192708	3.27832e-11
90		Thorium	Th	7440-29-1	element	resources		0	0	0	0
69		Thulium	Tm	7440-30-4	element	resources		0.000498486	57342.1	28.5843	4.86271e-09
50		Tin	Sn	7440-31-5	element	resources		0.0814549	291000000	2.37034e+07	0.00403238
22		Titanium	Ti	7440-32-6	element	resources		3.78996e-07	5.20352e+09	1972.11	3.35493e-07
74		Tungsten	W	7440-33-7	element	resources		0.0210183	89400000	1.87904e+06	0.000319659
92		Uranium	U	7440-61-1	element	resources		0.00782318	60516000	473427	8.05388e-05
23		Vanadium	V	7440-62-2	element	resources		6.57728e-06	77800000	511.712	8.70518e-08
54		Xenon	Xe	7440-63-3	element	resources		0	0	0	0
70		Ytterbium	Yb	7440-64-4	element	resources		0.000100943	516079	52.0948	8.8623e-09
39		Yttrium	Y	7440-65-5	element	resources		1.11186e-05	6.26716e+06	69.682	1.18542e-08
30		Zinc	Zn	7440-66-6	element	resources		0.00276204	12800000000	3.53541e+07	0.0060144
40		Zirconium	Zr	7440-67-7	element	resources		2.62787e-05	1.12528e+09	29570.8	5.03055e-06
										5.87825e+09	category total, world, ADP based on cumulative production 1970-2015, reference year 2015

## Sheet: characterisation model
description of characterisation model
		In Guinée and Heijungs (1995) and Oers et al. (2002), resource depletion is considered an environmental problem in its own right. The problem is defined as the decreasing natural availability of abiotic natural resources.
		The characterization model for abiotic resource depletion is based on physical data on reserves and annual de-accumulation, with de-accumulation defined as the annual production (e.g., in kg/yr) minus the annual regeneration (e.g., in kg/yr) of a resource, the latter of which was assumed to be zero.
		When assessing the availability of resources one can use the concept of availability in a narrow or a broad sense. In the present model of resource depletion the narrow definition of availability is defined. Availability in the narrow sense focuses on the extraction of the resource from the stock in the environment, the primary extraction medium, whereas availability in the broad sense focuses on…
		Estimates of the amounts of resources (elements, minerals, fuels) available for future generations depend on the definition of reserve that is used, e.g. crustal content (ultimate reserve), mineral resource (reserve base) or mineral reserve (economic reserve). In the characterization model for abiotic resource depletion the “ultimate reserve” is adopted as the presumably best proxy for the “ultim…
		The characterization model is a function of natural reserves (stocks/deposits in the environment) of the abiotic resources combined with their rates of extraction (see Equation). The method has been made operational for many elements and fossil fuels (actually: the energy content of fossil fuels).
		The natural reserves of these resources are based on “ultimate reserves”; that is, on concentrations of the elements and fossil carbon in the Earth’s crust, ocean and atmosphere.
		The characterization factor is the abiotic depletion potential (ADP). This factor is derived for each extraction of elements and fossil fuels and is a relative measure, with the depletion of the element antimony as a reference (see Equation).
		Equation
		ADPi: abiotic depletion potential of resource i (kg antimony equivalents/kg of resource i);
		mi: quantity of resource i extracted (kg);
		Ri: ultimate reserve of resource i (kg);
		DRi: extraction rate of resource i (kg·yr–1) (regeneration is assumed to be zero);
		Rref: ultimate reserve of the reference resource, antimony (kg);
		DRref: extraction rate of the reference resource, Rref (kg·yr–1).
		In this spreadsheet only the ADPs for elements are updated

## Sheet: basic earth data
Basic input data for earth characteristics
basic earth and earth crust data		total earth	continent	ocean	atmosphere		source	assumption									original data (Guinée, 1995)
average depth earth crust (m)		12000	12000	7500			Rudnick&Gao (2003)	average depth of upper earth crust (see row 30 and 37), only upper earth crust is considered to be the relevant layer for the crustal content ultimately available for extraction, also for the very long time horizon									17000 m	Guinée (1995)	source???
average density earth crust (kg/m3)		2970	2700	3150			internal calculation, based on upper continental earth crust (see row 25) and oceanic crust (see row 27) only										2670 kg/m3	Guinée (1995)	source???
surface area earth crust (m2)		510000000000000	148000000000000	361000000000000			Harte, John (1988)	only the continental earth crust above sea level (see row 19) is assumed to be the relevant area for the crustal content ultimately available for extraction, also for the very long time horizon
mass earth crust (kg)		1.81764e+22	4.7952e+21	8.52863e+21			internal calculation	watch out different calculation is possible, based on the real area of the earth surface that is covered by the continental crust												6.6096e+21	7.22925e+21
mass of oceans (kg)				1.4e+21			Harte, John (1988)
water volume of oceans (l)				1.35e+21			Harte, John (1988)
mass of atmosphere (kg)					5.14e+18		Harte, John (1988)
background information
		total earth	continent	ocean	atmosphere
mass
mass of the Earth (kg)		5.98e+24					Harte, John (1988)
earth surface
surface earth (m2)		510000000000000	148000000000000	361000000000000			Harte, John (1988)	0.290196	0.707843
surface area earth crust (%)			40	60			About 40% of Earth's surface is currently occupied by continental crust.[1]
density (g/cm3)		total earth	continent	ocean	atmosphere
average density of Earth (kg/m3)		5500					Harte, John (1988)
average density continental Crust (g/cm3)			2.7 to 3.0				http://jersey.uoregon.edu/~mstrick/AskGeoMan/geoQuerry57.html
average density continental crust, upper (g/cm3)			2.69 and 2.74				https://en.wikipedia.org/wiki/Crust_(geology)
average density continental crust, lower (g/cm3)			3.0 and 3.25				https://en.wikipedia.org/wiki/Crust_(geology)
average density oceanic crust (g/cm3)			3.0 to 3.3				http://jersey.uoregon.edu/~mstrick/AskGeoMan/geoQuerry57.html
layer thickness (km)
continental crust, average depth (km)			40				Rudnick&Gao (2003)
upper (km)			0-12				Rudnick&Gao (2003)
middle (deep) (km)			12-40				Rudnick&Gao (2003)
lower (deep) (km)			23-40				Rudnick&Gao (2003)
mining depth, at present (km)			0-4				The top ten deepest mines in the world	http://www.mining-technology.com/features/feature-top-ten-deepest-mines-world-south-africa/
continental crust, thickness range (km)			5-80				https://en.wikipedia.org/wiki/Continental_crust
oceanic crust, thickness range (km)			5-10				https://www.nationalgeographic.org/encyclopedia/crust/

## Sheet: continental crust composition
basic data to derive the crustal content (ultimate reserves)								earth crust composition		continental earth crust composition
based on concentrations of elements in the earth crust
								(Lide, 1990)(section 14, page 14-7)		(Rudnick and Gao, 2014)(table 11, page 43)							means no data reported in Rudnick and Gao, 2014
										upper	middle	lower	total	reported as:
No.		Name	Sym.	cas no.	group	initial emission or extraction	unit
89	*	Actinium	Ac	7440-34-8	element	resources	kg/kg	5.5e-16		5.5e-16						Lide, 1990
13		Aluminium	Al	7429-90-5	element	resources	kg/kg	0.0832		0.154	0.15	0.169	0.159	Al2O3
95	*	Americium	Am
51		Antimony	Sb	7440-36-0	element	resources	kg/kg	2e-07		4e-07	2.8e-07	1e-07	2e-07	Sb
18		Argon	Ar	7440-37-1	element	resources	kg/kg	3.5e-06		3.5e-06
33		Arsenic	As	7440-38-2	element	resources	kg/kg	1.8e-06		4.8e-06	3.1e-06	2e-07	2.5e-06	As
85	*	Astatine	At
56		Barium	Ba	7440-39-3	element	resources	kg/kg	0.000425		0.000628	0.000532	0.000259	0.000456	Ba
97	*	Berkelium	Bk
4		Beryllium	Be	7440-41-7	element	resources	kg/kg	2.8e-06		2.1e-06	2.3e-06	1.4e-06	1.9e-06	Be
83		Bismuth	Bi	7440-69-9	element	resources	kg/kg	1.7e-07		1.6e-07	1.7e-07	2e-07	1.8e-07	Bi
107	*	Bohrium	Bh
5		Boron	B	7440-42-8	element	resources	kg/kg	1e-05		1.7e-05	1.7e-05	2e-06	1.1e-05	B
35		Bromine	Br	7726-95-6	element	resources	kg/kg	2.5e-06		1.6e-06		3e-07	8.8e-07	Br
48		Cadmium	Cd	7440-43-9	element	resources	kg/kg	2e-07		9e-08	6.1e-08	1e-07	8e-08	Cd
20		Calcium	Ca	7440-70-2	element	resources	kg/kg	0.0415		0.0359	0.0525	0.0959	0.0641	CaO
98	*	Californium	Cf
6		Carbon	C							0.00018						Harte, 1988
58		Cerium	Ce	7440-45-1	element	resources	kg/kg	6e-05		6.3e-05	5.3e-05	2e-05	4.3e-05	Ce
55		Cesium	Cs	7440-46-2	element	resources	kg/kg	1e-06		4.9e-06	2.2e-06	3e-07	2e-06	Cs
17		Chlorine	Cl	7782-50-5	element	resources	kg/kg	0.00013		0.00037	0.000182	0.00025	0.000244	Cl
24		Chromium	Cr	7440-47-3	element	resources	kg/kg	0.0001		9.2e-05	7.6e-05	0.000215	0.000135	Cr
27		Cobalt	Co	7440-48-4	element	resources	kg/kg	2.5e-05		1.73e-05	2.2e-05	3.8e-05	2.66e-05	Co
29		Copper	Cu	7440-50-8	element	resources	kg/kg	5.5e-05		2.8e-05	2.6e-05	2.6e-05	2.7e-05	Cu
96	*	Curium	Cm
105	*	Dubnium	Db
66		Dysprosium	Dy	7429-91-6	element	resources	kg/kg	3e-06		3.9e-06	3.8e-06	3.1e-06	3.6e-06	Dy
99	*	Einsteinium	Es
68		Erbium	Er	7440-52-0	element	resources	kg/kg	2.8e-06		2.3e-06	2.3e-06	1.9e-06	2.1e-06	Er
63		Europium	Eu	7440-53-1	element	resources	kg/kg	1.2e-06		1e-06	1.4e-06	1.1e-06	1.1e-06	Eu
100	*	Fermium	Fm
9		Fluorine	F	7782-41-4	element	resources	kg/kg	0.000625		0.000557	0.000524	0.00057	0.000553	F
87	*	Francium	Fr
64		Gadolinium	Gd	7440-54-2	element	resources	kg/kg	5.4e-06		4e-06	4e-06	3.1e-06	3.7e-06	Gd
31		Gallium	Ga	7440-55-3	element	resources	kg/kg	1.5e-05		1.75e-05	1.75e-05	1.3e-05	1.6e-05	Ga
32		Germanium	Ge	7440-56-4	element	resources	kg/kg	5.4e-06		1.4e-06	1.1e-06	1.3e-06	1.3e-06	Ge
79		Gold	Au	7440-57-5	element	resources	kg/kg	4e-09		1.5e-09	6.6e-10	1.6e-09	1.3e-09	Au
72		Hafnium	Hf	7440-58-6	element	resources	kg/kg	4.7e-06		5.3e-06	4.4e-06	1.9e-06	3.7e-06	Hf
108	*	Hassium	Hs
2		Helium	He	7440-59-7	element	resources	kg/kg
67		Holmium	Ho	7440-60-0	element	resources	kg/kg	1.2e-06		8.3e-07	8.2e-07	6.8e-07	7.7e-07	Ho
1		Hydrogen	H	1333-74-0	element	resources	kg/kg			0.00152
49		Indium	In	7440-74-6	element	resources	kg/kg	1e-07		5.6e-08		5e-08	5.2e-08	In
53		Iodine	I	7553-56-2	element	resources	kg/kg	5e-07		1.4e-06		1.4e-07	7.1e-07	I
77		Iridium	Ir	7439-88-5	element	resources	kg/kg	1e-09		2.2e-11		5e-11	3.7e-11	Ir
26		Iron	Fe	7439-89-6	element	resources	kg/kg	0.0563		0.0504	0.0602	0.0857	0.0671	FeOT
36		Krypton	Kr	7439-90-9	element	resources	kg/kg	1e-10		1e-10
57		Lanthanum	La	7439-91-0	element	resources	kg/kg	3e-05		3.1e-05	2.4e-05	8e-06	2e-05	La
103	*	Lawrencium	Lr
82		Lead	Pb	7439-92-1	element	resources	kg/kg	1.25e-05		1.7e-05	1.52e-05	4e-06	1.1e-05	Pb
3		Lithium	Li	7439-93-2	element	resources	kg/kg	2e-05		2.4e-05	1.2e-05	1.3e-05	1.6e-05	Li
71		Lutetium	Lu	7439-94-3	element	resources	kg/kg	5e-07		3.1e-07	4e-07	2.5e-07	3e-07	Lu
12		Magnesium	Mg	7439-95-4	element	resources	kg/kg	0.0233		0.0248	0.0359	0.0724	0.0466	MgO
25		Manganese	Mn	7439-96-5	element	resources	kg/kg	0.00095		0.001	0.001	0.001	0.001	MnO
109	*	Meitnerium	Mt
101	*	Mendelevium	Md
80		Mercury	Hg	7439-97-6	element	resources	kg/kg	8e-08		5e-08	7.9e-09	1.4e-08	3e-08	Hg
42		Molybdenum	Mo	7439-98-7	element	resources	kg/kg	1.5e-06		1.1e-06	6e-07	6e-07	8e-07	Mo
60		Neodymium	Nd	7440-00-8	element	resources	kg/kg	2.8e-05		2.7e-05	2.5e-05	1.1e-05	2e-05	Nd
10		Neon	Ne	7440-01-9	element	resources	kg/kg	5e-09		5e-09
93	*	Neptunium	Np
28		Nickel	Ni	7440-02-0	element	resources	kg/kg	7.5e-05		4.7e-05	3.35e-05	8.8e-05	5.9e-05	Ni
41		Niobium	Nb	7440-03-1	element	resources	kg/kg	2e-05		1.2e-05	1e-05	5e-06	8e-06	Nb
7		Nitrogen	N	7727-37-9	element	resources	kg/kg			8.3e-05		3.4e-05	5.6e-05	N
102	*	Nobelium	No
76		Osmium	Os	7440-04-2	element	resources	kg/kg	1.5e-09		3.1e-11		5e-11	4.1e-11	Os
8		Oxygen	O	7782-44-7	element	resources				0.456
46		Palladium	Pd	7440-05-3	element	resources	kg/kg	1e-08		5.2e-10	7.6e-10	2.8e-09	1.5e-09	Pd
15		Phosphorus	P	7723-14-0	element	resources	kg/kg	0.00105		0.0015	0.0015	0.001	0.0013	P2O5
78		Platinum	Pt	7440-06-4	element	resources	kg/kg	5e-09		5e-10	8.5e-10	2.7e-09	1.5e-09	Pt
94	*	Plutonium	Pu
84	*	Polonium	Po	7440-08-6	element	resources	kg/kg	2e-16		2e-16
19		Potassium	K	7440-09-7	element	resources	kg/kg	0.0209		0.028	0.023	0.0061	0.0181	K2O
59		Praseodymium	Pr	7440-10-0	element	resources	kg/kg	8.2e-06		7.1e-06	5.8e-06	2.4e-06	4.59e-06	Pr
61	*	Promethium	Pm	???	element	resources
91		Protactinium	Pa				kg/kg	1.4e-12		1.4e-12
88	*	Radium	Ra	7440-14-4	element	resources	kg/kg	9e-13		9e-13
86	*	Radon	Rn	10043-92-2	element	resources	kg/kg	4e-19		4e-19
75		Rhenium	Re	7440-15-5	element	resources	kg/kg	5e-09		1.98e-10		1.8e-10	1.88e-10
45		Rhodium	Rh	7440-16-6	element	resources	kg/kg	1e-09		1e-09
37		Rubidium	Rb	7440-17-7	element	resources	kg/kg	9e-05		8.4e-05	6.5e-05	1.1e-05	4.9e-05	Rb
44		Ruthenium	Ru	7440-18-8	element	resources	kg/kg	1e-09		3.4e-10		7.5e-10	5.7e-10	Ru
104	*	Rutherfordium	Rf
62		Samarium	Sm	7440-19-9	element	resources	kg/kg	6e-06		4.7e-06	4.6e-06	2.8e-06	3.9e-06	Sm
21		Scandium	Sc	7440-20-2	element	resources	kg/kg	2.2e-05		1.4e-05	1.9e-05	3.1e-05	2.19e-05	Sc
106	*	Seaborgium	Sg
34		Selenium	Se	7782-49-2	element	resources	kg/kg	5e-08		9e-08	6.4e-08	2e-07	1.3e-07	Se
14		Silicon	Si	7440-21-3	element	resources	kg/kg	0.282		0.666	0.635	0.534	0.606	SiO2
47		Silver	Ag	7440-22-4	element	resources	kg/kg	7e-08		5.3e-08	4.8e-08	6.5e-08	5.6e-08	Ag
11		Sodium	Na	7440-23-5	element	resources	kg/kg	0.0236		0.0327	0.0339	0.0265	0.0307	Na2O
38		Strontium	Sr	7440-24-6	element	resources	kg/kg	0.000375		0.00032	0.000282	0.000348	0.00032	Sr
16		Sulfur	S	7704-34-9	element	resources	kg/kg	0.00026		0.000621	0.000249	0.000345	0.000404	S
73		Tantalum	Ta	7440-25-7	element	resources	kg/kg	2e-06		9e-07	6e-07	6e-07	7e-07	Ta
43	*	Technetium	Tc
52		Tellurium	Te	13494-80-9	element	resources	kg/kg	1e-09		1e-09
65		Terbium	Tb	7440-27-9	element	resources	kg/kg	9e-07		7e-07	7e-07	4.8e-07	6e-07	Tb
81		Thallium	Tl	7440-28-0	element	resources	kg/kg	4.5e-07		9e-07	2.7e-07	3.2e-07	5e-07	Tl
90		Thorium	Th	7440-29-1	element	resources	kg/kg	9.6e-06		1.05e-05	6.5e-06	1.2e-06	5.6e-06	Th
69		Thulium	Tm	7440-30-4	element	resources	kg/kg	4.8e-07		3e-07	3.2e-07	2.4e-07	2.8e-07	Tm
50		Tin	Sn	7440-31-5	element	resources	kg/kg	2e-06		2.1e-06	1.3e-06	1.7e-06	1.7e-06	Sn
22		Titanium	Ti	7440-32-6	element	resources	kg/kg	0.0057		0.0064	0.0069	0.0082	0.0072	TiO2
74		Tungsten	W	7440-33-7	element	resources	kg/kg	1.5e-06		1.9e-06	6e-07	6e-07	1e-06	W
92		Uranium	U	7440-61-1	element	resources	kg/kg	2.7e-06		2.7e-06	1.3e-06	2e-07	1.3e-06	U
23		Vanadium	V	7440-62-2	element	resources	kg/kg	0.000135		9.7e-05	0.000107	0.000196	0.000138	V
54		Xenon	Xe	7440-63-3	element	resources	kg/kg	3e-11		3e-11
70		Ytterbium	Yb	7440-64-4	element	resources	kg/kg	3e-06		2e-06	2.2e-06	1.5e-06	1.9e-06	Yb
39		Yttrium	Y	7440-65-5	element	resources	kg/kg	3.3e-05		2.1e-05	2e-05	1.6e-05	1.9e-05	Y
30		Zinc	Zn	7440-66-6	element	resources	kg/kg	7e-05		6.7e-05	6.95e-05	7.8e-05	7.2e-05	Zn
40		Zirconium	Zr	7440-67-7	element	resources	kg/kg	0.000165		0.000193	0.000149	6.8e-05	0.000132	Zr
109								83		87

## Sheet: ultimate reserves
			basic data to derive the ultimate ultimate reserves						based on concentrations of elements in the earth crust
									data on concentrations in air and water based on Harte, 1988 and Guinee J.B., 1995. Development of a methodology for the environmental life-cycle assessment of products. Thesis, Leiden University, Centre of Environmental Science, Leiden, The Netherlands
			basic earth and earth crust data		total earth	continent	ocean	atmosphere		source	assumption
			average depth earth crust (m)		12000	12000	7500			Rudnick&Gao (2003)	average depth of upper earth crust, only upper earth crust is considered to be the relevant layer for the crustal content ultimately available for extraction, also for the very long time horizon
			average density earth crust (kg/m3)		2970	2700	3150			internal calculation, based on upper continental earth crust and oceanic crust only
			surface area earth crust (m2)		510000000000000	148000000000000	361000000000000			Harte, John (1988)	only the continental earth crust above sea level is assumed to be the relevant area for the crustal content ultimately available for extraction, also for the very long time horizon
			mass earth crust (kg)		1.81764e+22	4.7952e+21	8.52863e+21			internal calculation	watch out different calculation is possible, based on the real area of the earth surface that is covered by the continental crust					6.6096e+21	7.22925e+21
			mass of oceans (kg)				1.4e+21			Harte, John (1988)
			water volume of oceans (l)				1.35e+21			Harte, John (1988)
			mass of atmosphere (kg)					5.14e+18		Harte, John (1988)
			adapted:			adapted	Guinée (1995)
				average depth earth crust (m)		12000	17000	m
				average density earth crust (kg/m3)		2970	2670	kg/m3
				crustal content		Rudnick&Gao	Lide, 1990
														concentration (fraction) in			R_ult,res			R_ult,res
No.		Name	Sym.	cas no.	group	initial emission or extraction	unit			molweight		regeneration	cum.prod.	crust	sea	air	crust	sea	air	crust, ocean and air	extr.factor	R_ult,res
89	*	Actinium	Ac	7440-34-8	element	resources	kg			227		0		5.5e-16	0	0	2637360	0	0	2637360	1	2637360
13		Aluminium	Al	7429-90-5	element	resources	kg			26.9815		0		0.0815055	1e-08	0	3.90835e+20	14000000000000	0	3.90835e+20	1	3.90835e+20
95	*	Americium	Am
51		Antimony	Sb	7440-36-0	element	resources	kg			121.75		0		4e-07	3.3e-10	0	1918080000000000	462000000000	0	1918542000000000	1	1918542000000000
18		Argon	Ar	7440-37-1	element	resources	kg			39.948		0		3.5e-06	6e-07	0.0128	1.67832e+16	840000000000000	6.5792e+16	8.34152e+16	1	8.34152e+16
33		Arsenic	As	7440-38-2	element	resources	kg			74.9216		0		4.8e-06	3e-09	0	2.3017e+16	4200000000000	0	2.30212e+16	1	2.30212e+16
85	*	Astatine	At
56		Barium	Ba	7440-39-3	element	resources	kg			137.34		0		0.000628	3e-08	0	3.01139e+18	42000000000000	0	3.01143e+18	1	3.01143e+18
97	*	Berkelium	Bk
4		Beryllium	Be	7440-41-7	element	resources	kg			9.0122		0		2.1e-06	6e-13	0	1.00699e+16	840000000	0	1.00699e+16	1	1.00699e+16
83		Bismuth	Bi	7440-69-9	element	resources	kg			208.981		0		1.6e-07	1.7e-11	0	767232000000000	23800000000	0	767255800000000	1	767255800000000
107	*	Bohrium	Bh
5		Boron	B	7440-42-8	element	resources	kg			10.811		0		1.7e-05	4.6e-06	0	8.15184e+16	6440000000000000	0	8.79584e+16	1	8.79584e+16
35		Bromine	Br	7726-95-6	element	resources	kg			79.904		0		1.6e-06	6.5e-05	0	7672320000000000	9.1e+16	0	9.86723e+16	1	9.86723e+16
48		Cadmium	Cd	7440-43-9	element	resources	kg			112.4		0		9e-08	1.1e-10	0	431568000000000	154000000000	0	431722000000000	1	431722000000000
20		Calcium	Ca	7440-70-2	element	resources	kg			40.08		0		0.0256579	0.0004	0	1.23035e+20	5.6e+17	0	1.23595e+20	1	1.23595e+20
98	*	Californium	Cf
6		Carbon	C	7782-42-5	element	resources	kg			12.0107		0		0.00018	2.8e-05	0.000140825	8.63136e+17	3.92e+16	7.2384e+14	9.0306e+17	1	9.0306e+17		added to guinée (1995), based on Harte, 1988
58		Cerium	Ce	7440-45-1	element	resources	kg			140.12		0		6.3e-05	4e-10	0	3.02098e+17	560000000000	0	3.02098e+17	1	3.02098e+17
55		Cesium	Cs	7440-46-2	element	resources	kg			132.905		0		4.9e-06	5e-10	0	2.34965e+16	700000000000	0	2.34972e+16	1	2.34972e+16
17		Chlorine	Cl	7782-50-5	element	resources	kg			35.453		0		0.00037	0.019	0	1.77422e+18	2.66e+19	0	2.83742e+19	1	2.83742e+19
24		Chromium	Cr	7440-47-3	element	resources	kg			51.996		0		9.2e-05	5e-11	0	4.41158e+17	70000000000	0	4.41158e+17	1	4.41158e+17		concentration (fraction) in			R_ult,res			R_ult,res
27		Cobalt	Co	7440-48-4	element	resources	kg			58.9332		0		1.73e-05	2.7e-10	0	8.2957e+16	378000000000	0	8.29573e+16	1	8.29573e+16	Lide, 1990	crust	sea	air	crust	sea	air	crust, ocean and air	extr.factor	R_ult,res
29		Copper	Cu	7440-50-8	element	resources	kg			63.546		0		2.8e-05	3e-09	0	1.34266e+17	4200000000000	0	1.3427e+17	1	1.3427e+17		5.5e-05	3e-09	0	2.63736e+17	4200000000000	0	2.6374e+17	1	2.6374e+17
96	*	Curium	Cm
105	*	Dubnium	Db
66		Dysprosium	Dy	7429-91-6	element	resources	kg			162.5		0		3.9e-06	0	0	1.87013e+16	0	0	1.87013e+16	1	1.87013e+16
99	*	Einsteinium	Es
68		Erbium	Er	7440-52-0	element	resources	kg			167.26		0		2.3e-06	0	0	1.1029e+16	0	0	1.1029e+16	1	1.1029e+16
63		Europium	Eu	7440-53-1	element	resources	kg			151.96		0		1e-06	0	0	4795200000000000	0	0	4795200000000000	1	4795200000000000
100	*	Fermium	Fm
9		Fluorine	F	7782-41-4	element	resources	kg			18.9984		0		0.000557	1.3e-06	0	2.67093e+18	1820000000000000	0	2.67275e+18	1	2.67275e+18
87	*	Francium	Fr
64		Gadolinium	Gd	7440-54-2	element	resources	kg			157.25		0		4e-06	0	0	1.91808e+16	0	0	1.91808e+16	1	1.91808e+16
31		Gallium	Ga	7440-55-3	element	resources	kg			69.72		0		1.75e-05	3e-11	0	8.3916e+16	42000000000	0	8.3916e+16	1	8.3916e+16
32		Germanium	Ge	7440-56-4	element	resources	kg			72.59		0		1.4e-06	7e-11	0	6713280000000000	98000000000	0	6713378000000000	1	6713378000000000
79		Gold	Au	7440-57-5	element	resources	kg			196.967		0		1.5e-09	1.1e-11	0	7192800000000	1.54e+10	0	7208200000000	1	7208200000000
72		Hafnium	Hf	7440-58-6	element	resources	kg			178.49		0		5.3e-06	8e-12	0	2.54146e+16	11200000000	0	2.54146e+16	1	2.54146e+16
108	*	Hassium	Hs
2		Helium	He	7440-59-7	element	resources	kg			4.0026		0		0		7e-07	0	0	3598000000000	3598000000000	1	3598000000000
67		Holmium	Ho	7440-60-0	element	resources	kg			164.93		0		8.3e-07	0	0	3980016000000000	0	0	3980016000000000	1	3980016000000000
1		Hydrogen	H	1333-74-0	element	resources	kg			1.00794		0		0.00152	0.111901	3e-08	7.2887e+18	1.56661e+20	154200000000	1.6395e+20	1	1.6395e+20
49		Indium	In	7440-74-6	element	resources	kg			114.82		0		5.6e-08	2e-08	0	268531200000000	28000000000000	0	296531200000000	1	296531200000000
53		Iodine	I	7553-56-2	element	resources	kg			126.904		0		1.4e-06	6e-08	0	6713280000000000	84000000000000	0	6797280000000000	1	6797280000000000
77		Iridium	Ir	7439-88-5	element	resources	kg			192.2		0		2.2e-11	0	0	105494400000	0	0	105494400000	1	105494400000
26		Iron	Fe	7439-89-6	element	resources	kg			55.847		0		0.0391767	1e-08	0	1.8786e+20	14000000000000	0	1.8786e+20	1	1.8786e+20
36		Krypton	Kr	7439-90-9	element	resources	kg			83.8		0		1e-10	2.5e-09	3.2e-06	479520000000	3500000000000	16448000000000	20427520000000	1	20427520000000
57		Lanthanum	La	7439-91-0	element	resources	kg			138.91		0		3.1e-05	1.2e-11	0	1.48651e+17	16800000000	0	1.48651e+17	1	1.48651e+17
103	*	Lawrencium	Lr
82		Lead	Pb	7439-92-1	element	resources	kg			6.941		0		1.7e-05	3e-11	0	8.15184e+16	42000000000	0	8.15184e+16	1	8.15184e+16
3		Lithium	Li	7439-93-2	element	resources	kg			207.19		0		2.4e-05	1.8e-07	0	1.15085e+17	252000000000000	0	1.15337e+17	1	1.15337e+17
71		Lutetium	Lu	7439-94-3	element	resources	kg			174.97		0		3.1e-07	0	0	1486512000000000	0	0	1486512000000000	1	1486512000000000
12		Magnesium	Mg	7439-95-4	element	resources	kg			24.305		0		0.0149554	0.00135	0	7.17143e+19	1.89e+18	0	7.36043e+19	1	7.36043e+19
25		Manganese	Mn	7439-96-5	element	resources	kg			54.938		0		0.000774462	2e-09	0	3.7137e+18	2800000000000	0	3.7137e+18	1	3.7137e+18
109	*	Meitnerium	Mt
101	*	Mendelevium	Md
80		Mercury	Hg	7439-97-6	element	resources	kg			200.59		0		5e-08	3e-11	0	239760000000000	42000000000	0	239802000000000	1	239802000000000
42		Molybdenum	Mo	7439-98-7	element	resources	kg			95.94		0		1.1e-06	1e-08	0	5274720000000000	14000000000000	0	5288720000000000	1	5288720000000000
60		Neodymium	Nd	7440-00-8	element	resources	kg			144.24		0		2.7e-05	0	0	1.2947e+17	0	0	1.2947e+17	1	1.2947e+17
10		Neon	Ne	7440-01-9	element	resources	kg			20.179		0		5e-09	1.4e-10	1.2e-05	23976000000000	196000000000	61680000000000	85852000000000	1	85852000000000
93	*	Neptunium	Np
28		Nickel	Ni	7440-02-0	element	resources	kg			58.71		0		4.7e-05	5.4e-09	0	2.25374e+17	7.56e+12	0	2.25382e+17	1	2.25382e+17
41		Niobium	Nb	7440-03-1	element	resources	kg			92.906		0		1.2e-05	1e-11	0	5.75424e+16	14000000000	0	5.75424e+16	1	5.75424e+16
7		Nitrogen	N	7727-37-9	element	resources	kg			14.0067		0		8.3e-05	1e-11	0.7549	3.98002e+17	14000000000	3.88019e+18	4.27819e+18	1	4.27819e+18
102	*	Nobelium	No
76		Osmium	Os	7440-04-2	element	resources	kg			190.2		0		3.1e-11	0	0	148651200000	0	0	148651200000	1	148651200000
8		Oxygen	O	7782-44-7	element	resources	kg			15.999		0		0.456	0.888099	0.2314	2.18661e+21	1.24334e+21	1.1894e+18	3.43114e+21	1	3.43114e+21
46		Palladium	Pd	7440-05-3	element	resources	kg			106.4		0		5.2e-10	0	0	2493504000000	0	0	2493504000000	1	2493504000000
15		Phosphorus	P	7723-14-0	element	resources	kg			30.9738		0		0.000654641	7e-08	0	3.13913e+18	98000000000000	0	3.13923e+18	1	3.13923e+18
78		Platinum	Pt	7440-06-4	element	resources	kg			195.09		0		5e-10	0	0	2397600000000	0	0	2397600000000	1	2397600000000
94	*	Plutonium	Pu
84	*	Polonium	Po	7440-08-6	element	resources	kg			209		0		2e-16	0	0	959040	0	0	959040	1	959040
19		Potassium	K	7440-09-7	element	resources	kg			39.102		0		0.0232446	0.00038	0	1.11463e+20	5.32e+17	0	1.11995e+20	1	1.11995e+20
59		Praseodymium	Pr	7440-10-0	element	resources	kg			140.907		0		7.1e-06	0	0	3.40459e+16	0	0	3.40459e+16	1	3.40459e+16
61	*	Promethium	Pm	???	element	resources
91		Protactinium	Pa				kg			231		0		1.4e-12	2e-15	0	6713280000	2800000	0	6716080000	1	6716080000
88	*	Radium	Ra	7440-14-4	element	resources	kg			226		0		9e-13	6e-17	0	4315680000	84000	0	4315764000	1	4315764000
86	*	Radon	Rn	10043-92-2	element	resources	kg			222		0		4e-19	6e-22	0	1918.08	0.84	0	1918.92	1	1918.92
75		Rhenium	Re	7440-15-5	element	resources	kg			186.2		0		1.98e-10	0	0	949449600000	0	0	949449600000	1	949449600000
45		Rhodium	Rh	7440-16-6	element	resources	kg			102.905		0		1e-09	0	0	4795200000000	0	0	4795200000000	1	4795200000000
37		Rubidium	Rb	7440-17-7	element	resources	kg			85.47		0		8.4e-05	1.2e-07	0	4.02797e+17	168000000000000	0	4.02965e+17	1	4.02965e+17
44		Ruthenium	Ru	7440-18-8	element	resources	kg			101.07		0		3.4e-10	0	0	1630368000000	0	0	1630368000000	1	1630368000000
104	*	Rutherfordium	Rf
62		Samarium	Sm	7440-19-9	element	resources	kg			150.35		0		4.7e-06	0	0	2.25374e+16	0	0	2.25374e+16	1	2.25374e+16
21		Scandium	Sc	7440-20-2	element	resources	kg			44.956		0		1.4e-05	0	0	6.71328e+16	0	0	6.71328e+16	1	6.71328e+16
106	*	Seaborgium	Sg
34		Selenium	Se	7782-49-2	element	resources	kg			78.96		0		9e-08	9e-11	0	431568000000000	126000000000	0	431694000000000	1	431694000000000
14		Silicon	Si	7440-21-3	element	resources	kg			28.086		0		0.311319	3e-06	0	1.49284e+21	4200000000000000	0	1.49284e+21	1	1.49284e+21
47		Silver	Ag	7440-22-4	element	resources	kg			107.87		0		5.3e-08	3e-10	0	254145600000000	420000000000	0	254565600000000	1	254565600000000
11		Sodium	Na	7440-23-5	element	resources	kg			22.9898		0		0.0242589	0.0105	0	1.16326e+20	1.47e+19	0	1.31026e+20	1	1.31026e+20
38		Strontium	Sr	7440-24-6	element	resources	kg			87.62		0		0.00032	8.1e-06	0	1.53446e+18	1.134e+16	0	1.5458e+18	1	1.5458e+18
16		Sulfur	S	7704-34-9	element	resources	kg			32.064		0		0.000621	0.000885	2.47248e-10	2.97782e+18	1.239e+18	1.27086e+09	4.21682e+18	1	4.21682e+18
73		Tantalum	Ta	7440-25-7	element	resources	kg			180.948		0		9e-07	2.5e-12	0	4315680000000000	3500000000	0	4315683500000000	1	4315683500000000
43	*	Technetium	Tc
52		Tellurium	Te	13494-80-9	element	resources	kg			127.6		0		1e-09	0	0	4795200000000	0	0	4795200000000	1	4795200000000
65		Terbium	Tb	7440-27-9	element	resources	kg			158.924		0		7e-07	0	0	3356640000000000	0	0	3356640000000000	1	3356640000000000
81		Thallium	Tl	7440-28-0	element	resources	kg			204.37		0		9e-07	1e-11	0	4315680000000000	14000000000	0	4315694000000000	1	4315694000000000
90		Thorium	Th	7440-29-1	element	resources	kg			232.038		0		1.05e-05	5e-11	0	5.03496e+16	70000000000	0	5.03497e+16	1	5.03497e+16
69		Thulium	Tm	7440-30-4	element	resources	kg			168.934		0		3e-07	0	0	1438560000000000	0	0	1438560000000000	1	1438560000000000
50		Tin	Sn	7440-31-5	element	resources	kg			118.69		0		2.1e-06	3e-09	0	1.00699e+16	4200000000000	0	1.00741e+16	1	1.00741e+16
22		Titanium	Ti	7440-32-6	element	resources	kg			47.9		0		0.00383689	1e-09	0	1.83987e+19	1400000000000	0	1.83987e+19	1	1.83987e+19
74		Tungsten	W	7440-33-7	element	resources	kg			183.85		0		1.9e-06	1e-10	0	9110880000000000	140000000000	0	9111020000000000	1	9111020000000000
92		Uranium	U	7440-61-1	element	resources	kg			238.03		0		2.7e-06	3e-09	0	1.2947e+16	4200000000000	0	1.29512e+16	1	1.29512e+16
23		Vanadium	V	7440-62-2	element	resources	kg			50.942		0		9.7e-05	2e-09	0	4.65134e+17	2800000000000	0	4.65137e+17	1	4.65137e+17
54		Xenon	Xe	7440-63-3	element	resources	kg			131.3		0		3e-11	5.2e-11	0	143856000000	72800000000	0	216656000000	1	216656000000
70		Ytterbium	Yb	7440-64-4	element	resources	kg			173.04		0		2e-06	0	0	9590400000000000	0	0	9590400000000000	1	9590400000000000
39		Yttrium	Y	7440-65-5	element	resources	kg			88.905		0		2.1e-05	3e-10	0	1.00699e+17	420000000000	0	1.007e+17	1	1.007e+17
30		Zinc	Zn	7440-66-6	element	resources	kg			65.38		0		6.7e-05	1e-08	0	3.21278e+17	14000000000000	0	3.21292e+17	1	3.21292e+17
40		Zirconium	Zr	7440-67-7	element	resources	kg			91.22		0		0.000193	2.2e-11	0	9.25474e+17	3.08e+10	0	9.25474e+17	1	9.25474e+17
																						#REF!			#REF!

## Sheet: minerals to elements matrix
fraction of element in configurations or ore and occurrence of the elements in ores									conversion BGS and/or USGS data: from minerals composition to elements, if necessary. (many of the USGS data are already provided in tonnes element content.)								more data on mineral composition may be found on:		http://webmineral.com/data/				grey marked resources are NOT taken into account, to avoid double counting because of dependency with other reported resources in the process chain
									aggregates, primary (crushed stone, sand and gravel)	aluminium (Bauxiet)	alumina	aluminium, primary	antimony	arsenic white	asbestos	barytes	bentonite and fuller's earth	beryl	bismuth, Mine	borates	bromine	cadmium	cement, clinker	cement, finished	chromium ores and concentrates	cobalt, Mine	cobalt, refined	copper, mine	copper, refined	copper, smelter	diamond	diatomite	feldspar	ferro-alloys	fluorspar	gallium, primary	germanium metal	gold, mine	graphite	gypsum	indium, refinery	iodine	iron ore	pig iron	steel	kaolin	lead, mine	lead, refined	lithium minerals
									gross weight	ore	Al2O3	metal content	metal content	As2O3	gross weight	BaSO4?	gross weight	Beryl	metal content	Borates	metal content	metal content	gross weight	gross weight	tonnes of chromite	metal content	metal content	metal content	metal content	metal content	carats	gross weight	gross weight	gross weight	Fluorspar (CaF2)???	metal content	metal content	metal content	gross weight	gross weight	metal content		ore	Fe	steel	gross weight	metal content	metal content	gross weight
No.		Name	Sym.	cas no.	group	initial emission or extraction	unit	atomic weight (u)
89	*	Actinium	Ac	7440-34-8	element	resources	kg/kg	227
13		Aluminium	Al	7429-90-5	element	resources	kg/kg	26.9815	0.0813	0.25	0.529257	1					0.0983	0.100397														0.0238165	0.131894													0.209031
95	*	Americium	Am				kg/kg
51		Antimony	Sb	7440-36-0	element	resources	kg/kg	121.75					1
18		Argon	Ar	7440-37-1	element	resources	kg/kg	39.948
33		Arsenic	As	7440-38-2	element	resources	kg/kg	74.9216						0.757395
85	*	Astatine	At				kg/kg
56		Barium	Ba	7440-39-3	element	resources	kg/kg	137.34								0.588432
97	*	Berkelium	Bk				kg/kg
4		Beryllium	Be	7440-41-7	element	resources	kg/kg	9.0122										0.0503009
83		Bismuth	Bi	7440-69-9	element	resources	kg/kg	208.981											1
107	*	Bohrium	Bh				kg/kg
5		Boron	B	7440-42-8	element	resources	kg/kg	10.811												0.310576
35		Bromine	Br	7726-95-6	element	resources	kg/kg	79.904													1
48		Cadmium	Cd	7440-43-9	element	resources	kg/kg	112.4														1
20		Calcium	Ca	7440-70-2	element	resources	kg/kg	40.08	0.0363								0.0073						0.47917									0.0102203	0.0499213		0.486659					0.232793
98	*	Californium	Cf				kg/kg
6		Carbon	C				kg/kg	12.0107																							1								1
58		Cerium	Ce	7440-45-1	element	resources	kg/kg	140.12
55		Cesium	Cs	7440-46-2	element	resources	kg/kg	132.905
17		Chlorine	Cl	7782-50-5	element	resources	kg/kg	35.453
24		Chromium	Cr	7440-47-3	element	resources	kg/kg	51.996																	0.684207
27		Cobalt	Co	7440-48-4	element	resources	kg/kg	58.9332																		1	1
29		Copper	Cu	7440-50-8	element	resources	kg/kg	63.546																				1	1	1
96	*	Curium	Cm				kg/kg
105	*	Dubnium	Db				kg/kg
66		Dysprosium	Dy	7429-91-6	element	resources	kg/kg	162.5
99	*	Einsteinium	Es				kg/kg
68		Erbium	Er	7440-52-0	element	resources	kg/kg	167.26
63		Europium	Eu	7440-53-1	element	resources	kg/kg	151.96
100	*	Fermium	Fm				kg/kg
9		Fluorine	F	7782-41-4	element	resources	kg/kg	18.9984																											0.513341
87	*	Francium	Fr				kg/kg
64		Gadolinium	Gd	7440-54-2	element	resources	kg/kg	157.25
31		Gallium	Ga	7440-55-3	element	resources	kg/kg	69.72																												1
32		Germanium	Ge	7440-56-4	element	resources	kg/kg	72.59																													1
79		Gold	Au	7440-57-5	element	resources	kg/kg	196.967																														1
72		Hafnium	Hf	7440-58-6	element	resources	kg/kg	178.49
108	*	Hassium	Hs				kg/kg
2		Helium	He	7440-59-7	element	resources	kg/kg	4.0026
67		Holmium	Ho	7440-60-0	element	resources	kg/kg	164.93
1		Hydrogen	H	1333-74-0	element	resources	kg/kg	1.00794							0.0145493		0.0404																							0.0234174						0.0156174
49		Indium	In	7440-74-6	element	resources	kg/kg	114.82																																	1
53		Iodine	I	7553-56-2	element	resources	kg/kg	126.904																																		1
77		Iridium	Ir	7439-88-5	element	resources	kg/kg	192.2
26		Iron	Fe	7439-89-6	element	resources	kg/kg	55.847	0.05																							0.0109812											0.62	1	???
36		Krypton	Kr	7439-90-9	element	resources	kg/kg	83.8
57		Lanthanum	La	7439-91-0	element	resources	kg/kg	138.91
103	*	Lawrencium	Lr				kg/kg
82		Lead	Pb	7439-92-1	element	resources	kg/kg	6.941																																							1	1
3		Lithium	Li	7439-93-2	element	resources	kg/kg	207.19																																									0.0437909
71		Lutetium	Lu	7439-94-3	element	resources	kg/kg	174.97
12		Magnesium	Mg	7439-95-4	element	resources	kg/kg	24.305	0.0209						0.263127
25		Manganese	Mn	7439-96-5	element	resources	kg/kg	54.938
109	*	Meitnerium	Mt				kg/kg
101	*	Mendelevium	Md				kg/kg
80		Mercury	Hg	7439-97-6	element	resources	kg/kg	200.59
42		Molybdenum	Mo	7439-98-7	element	resources	kg/kg	95.94
60		Neodymium	Nd	7440-00-8	element	resources	kg/kg	144.24
10		Neon	Ne	7440-01-9	element	resources	kg/kg	20.179
93	*	Neptunium	Np				kg/kg
28		Nickel	Ni	7440-02-0	element	resources	kg/kg	58.71
41		Niobium	Nb	7440-03-1	element	resources	kg/kg	92.906
7		Nitrogen	N	7727-37-9	element	resources	kg/kg	14.0067
102	*	Nobelium	No				kg/kg
76		Osmium	Os	7440-04-2	element	resources	kg/kg	190.2
8		Oxygen	O	7782-44-7	element	resources	kg/kg	15.999	0.466		0.470743			0.242605	0.519617	0.27419	0.6411	0.535783		0.689424					0.315793							0.489576	0.469247							0.557554						0.557764
46		Palladium	Pd	7440-05-3	element	resources	kg/kg	106.4
15		Phosphorus	P	7723-14-0	element	resources	kg/kg	30.9738
78		Platinum	Pt	7440-06-4	element	resources	kg/kg	195.09
94	*	Plutonium	Pu				kg/kg
84	*	Polonium	Po	7440-08-6	element	resources	kg/kg	209
19		Potassium	K	7440-09-7	element	resources	kg/kg	39.102	0.0259																								0.0472707
59		Praseodymium	Pr	7440-10-0	element	resources	kg/kg	140.907
61	*	Promethium	Pm	???	element	resources	kg/kg	231
91		Protactinium	Pa				kg/kg
88	*	Radium	Ra	7440-14-4	element	resources	kg/kg	226
86	*	Radon	Rn	10043-92-2	element	resources	kg/kg	222
75		Rhenium	Re	7440-15-5	element	resources	kg/kg	186.2
45		Rhodium	Rh	7440-16-6	element	resources	kg/kg	102.905
37		Rubidium	Rb	7440-17-7	element	resources	kg/kg	85.47
44		Ruthenium	Ru	7440-18-8	element	resources	kg/kg	101.07
104	*	Rutherfordium	Rf				kg/kg
62		Samarium	Sm	7440-19-9	element	resources	kg/kg	150.35
21		Scandium	Sc	7440-20-2	element	resources	kg/kg	44.956
106	*	Seaborgium	Sg				kg/kg
34		Selenium	Se	7782-49-2	element	resources	kg/kg	78.96
14		Silicon	Si	7440-21-3	element	resources	kg/kg	28.086	0.2772						0.202707		0.2046	0.31352														0.403406	0.274584													0.217588
47		Silver	Ag	7440-22-4	element	resources	kg/kg	107.87
11		Sodium	Na	7440-23-5	element	resources	kg/kg	22.9898	0.0283								0.0084																0.0277926
38		Strontium	Sr	7440-24-6	element	resources	kg/kg	87.62
16		Sulfur	S	7704-34-9	element	resources	kg/kg	32.064								0.137378																								0.186235
73		Tantalum	Ta	7440-25-7	element	resources	kg/kg	180.948
43	*	Technetium	Tc				kg/kg
52		Tellurium	Te	13494-80-9	element	resources	kg/kg	127.6
65		Terbium	Tb	7440-27-9	element	resources	kg/kg	158.924
81		Thallium	Tl	7440-28-0	element	resources	kg/kg	204.37
90		Thorium	Th	7440-29-1	element	resources	kg/kg	232.038
69		Thulium	Tm	7440-30-4	element	resources	kg/kg	168.934
50		Tin	Sn	7440-31-5	element	resources	kg/kg	118.69
22		Titanium	Ti	7440-32-6	element	resources	kg/kg	47.9
74		Tungsten	W	7440-33-7	element	resources	kg/kg	183.85
92		Uranium	U	7440-61-1	element	resources	kg/kg	238.03
23		Vanadium	V	7440-62-2	element	resources	kg/kg	50.942
54		Xenon	Xe	7440-63-3	element	resources	kg/kg	131.3
70		Ytterbium	Yb	7440-64-4	element	resources	kg/kg	173.04
39		Yttrium	Y	7440-65-5	element	resources	kg/kg	88.905
30		Zinc	Zn	7440-66-6	element	resources	kg/kg	65.38
40		Zirconium	Zr	7440-67-7	element	resources	kg/kg	91.22
									0.9859	0.25	1	1	1	1	1	1	1.0001	1	1	1	1	1	0.47917	0	1	1	1	1	1	1	1	0.938	1.00071	0	1	1	1	1	1	1	1	1	0.62	1	0	1	1	1	0.0437909
										rest is rock													remainder basically Si and O																				rest is rock						rest is rock
[truncated: 61 more columns]

## Sheet: prod USGS(+BGS) minerals
	production of minerals	units as indicated	source:	USGS	Kelly, T.D., and Matos, G.R., comps., 2014, Historical statistics for mineral and material commodities in the United States (2016 version): U.S. Geological Survey Data Series 140, accessed [Month day, year], at
	world totals			https://minerals.usgs.gov/minerals/pubs/historical-statistics/										Data are taken from BGS		no data available for recent years, average is taken of period 1970-1976
			1970	1971	1972	1973	1974	1975	1976	1977	1978	1979	1980	1981	1982	1983	1984	1985	1986	1987	1988	1989	1990	1991	1992	1993	1994	1995	1996	1997	1998	1999	2000	2001	2002	2003	2004	2005	2006	2007	2008	2009	2010	2011	2012	2013	2014	2015
	aggregates, primary (crushed stone, sand and gravel)	metric tons (t) gross weight																							242879000	249593000	271176000	252570000	226841000	232170000	2114933233	2511029156	2474824379	2330640137	2367729222	2372942508	2520412423	2713615893	2873051258	2904163490	2847502692	2521216745	2368816754	2578229439	2296924674	2215302371	2189524148	2223891100
	aluminium (Bauxiet)	metric tons (t) gross weight	57800000	62100000	64900000	70400000	79600000	74800000	77400000	81900000	81000000	85500000	89200000	85300000	79300000	78700000	87200000	84200000	88200000	91600000	97400000	103000000	113000000	111000000	105000000	110000000	106000000	112000000	117000000	122000000	123000000	129000000	136000000	137000000	144000000	153000000	164000000	178000000	193000000	221000000	224000000	209000000	239000000	254000000	254000000	291000000	264000000	293000000
	alumina
	aluminium, primary	metric tons (t) aluminum content	9650000	10300000	11000000	12100000	13200000	12100000	12600000	13800000	14100000	14600000	15400000	15100000	13400000	13900000	15700000	15400000	15400000	16500000	18500000	19000000	19300000	19700000	19500000	19800000	19200000	19700000	20800000	21700000	22600000	23600000	24300000	24300000	26100000	28000000	29900000	31900000	33900000	37900000	39700000	37200000	41800000	46800000	49200000	51900000	54000000	57500000
	antimony	metric tons (t) antimony content	70000	64100	68100	69300	70500	67900	69200	72200	68800	71900	67200	59200	53800	48400	53400	55000	59900	56100	64400	68400	60400	64700	76000	73000	106000	103000	156000	155000	117000	108000	118000	157000	118000	116000	142000	172000	173000	180000	185000	158000	182000	187000	179000	159000	155000	142000
	arsenic white	metric tons (t) arsenic content	37500	37800	31400	35200	37200	30700	26100	23200	23300	22400	23600	33100	34500	31900	35600	40300	39600	47200	40400	49400	40400	34800	34700	31900	35400	35600	32500	31800	30500	31600	47500	45000	47200	52800	43800	45400	46100	40800	38900	36600	31400	28500	29600	28900	29100	27600
	asbestos	metric tons (t) gross weight	3490000	3580000	3780000	4190000	4160000	4140000	4770000	4790000	4690000	4760000	4700000	4350000	4560000	4430000	4310000	4250000	4030000	4240000	4320000	4240000	4010000	3530000	3350000	2520000	2250000	2180000	2100000	2150000	1980000	1850000	2110000	2060000	2320000	2400000	2340000	2210000	2150000	2250000	2090000	2110000	2010000	2000000	2020000	2050000	2030000	2030000
	barytes	metric tons (t) gross weight	3940000	3730000	3960000	4750000	4870000	5010000	5360000	5960000	7000000	7170000	7600000	8310000	7400000	5470000	5910000	6160000	4790000	4810000	5660000	5820000	5870000	5570000	4840000	4470000	4470000	4830000	6060000	6690000	5750000	6160000	6560000	6740000	6160000	6780000	7670000	7870000	7910000	7960000	8720000	7050000	6820000	8370000	9220000	8240000	8390000	7410000
	bentonite and fuller's earth	metric tons (t) gross weight	0	0	0	0	6666378	6536553	6880217	7213163	8275371	8798786	9640239	10107856	8820575	8788048	9609408	12914297	12103885	12354819	13071702	13266536	13425005	13773708	14006790	11851105	12528897	14079923	13100964	13402967	14692984	15328762	15675758	16093187	16173487	17670664	18281298	18655988	19067385	19856641	19628035	17484597	18515404	19134245	20352100	19554409	20171219	21293699	19209465
	beryl	metric tons (t) Beryllium	138	174	174	197	144	204	262	265	264	302	230	233.5	233.5	233.5	233.5	233.5	233.5	233.5	233.5	233.5	233.5	233.5	233.5	233.5	233.5	233.5	233.5	233.5	233.5	233.5	233.5	233.5	233.5	233.5	233.5	233.5	233.5	233.5	233.5	233.5	233.5	233.5	233.5	233.5	233.5	233.5
	bismuth, Mine	metric tons (t) bismuth content	3720	3830	4000	3720	4820	3980	3940	4480	4250	3420	3610	3750	4110	3980	3480	4410	3660	3170	3220	3650	3440	3230	2870	3550	3410	3430	3600	4490	3990	5490	3760	4420	4600	5100	5600	5400	5800	6400	7500	7500	7700	8170	6960	8480	12600	13300
	borates	metric tons (t) gross weight	257000	284000	314000	342000	328000	354000	2340000	2730000	2660000	2520000	2610000	2560000	2270000	2240000	2510000	2510000	2510000	2690000	2990000	2990000	2910000	2960000	2670000	2640000	3810000	4020000	4330000	4580000	4570000	4460000	4600000	4740000	4580000	4750000	4960000	4950000	3620000	4200000	4480000	3600000	4120000	8150000	5910000	6030000	9400000	9380000
	bromine	metric tons (t) bromine content	0	0	0	0	287804	277546	311739	351752	361063	402925	342853	345511	383187	364276	398084	381967	374559	390616	370420	401204	380605	380770	373552	383703	424458	450073	480786	550125	523903	519269	543551	488620	504927	482544	574107	652555	668441	646149	661237	592732	650383	605045	591893	615572	636492	568522	610203
	cadmium	metric tons (t) cadmium content	16500	15400	16700	17200	17300	15200	17000	18300	17300	18700	18200	17400	16400	17600	19600	19100	19100	19000	21900	21400	20200	20900	19600	18700	18200	20100	18900	20300	20200	20000	20300	20000	17800	18400	18600	20100	19900	18700	21600	20800	23700	21100	22300	22700	22700	23200
	cement, clinker
	cement, finished
	chromium ores and concentrates	metric tons (t) chromium content	1910000	2000000	1970000	2030000	2230000	2530000	2430000	2600000	2990000	2590000	2830000	2550000	2390000	2540000	2950000	3180000	3530000	3450000	3870000	4320000	3950000	4060000	3420000	3080000	3090000	4530000	3660000	4330000	4460000	4810000	4750000	3740000	4510000	4770000	5010000	5920000	6080000	6930000	7320000	6010000	7510000	8350000	8310000	9450000	9660000	9360000
	cobalt, Mine	metric tons (t) cobalt content	24200	25100	24800	29400	30900	30800	21400	21500	26800	29900	31300	30700	24600	37900	40900	47400	50200	41200	43800	42900	42300	33300	28000	21900	18000	24500	26200	27400	36300	33900	39300	46300	53700	54600	60300	65200	70000	73700	79900	81200	110000	111000	105000	114000	122000	126000
	cobalt, refined
	copper, mine	metric tons (t) copper content	5900000	5940000	6540000	6920000	7100000	6740000	7260000	7420000	7280000	7350000	7200000	7690000	7580000	7610000	7810000	7990000	7940000	8240000	8720000	9040000	9200000	9330000	9470000	9490000	9500000	10000000	11000000	11500000	12100000	12800000	13200000	13700000	13600000	13800000	14700000	15000000	15100000	15500000	15600000	16100000	16100000	16100000	16900000	18300000	18400000	19100000
	copper, refined
	copper, smelter
	diamond
	diatomite	metric tons (t) gross weight	1590000	1550000	1570000	1630000	1710000	1670000	1430000	1470000	1460000	1510000	1520000	1690000	1720000	1700000	1750000	1840000	1840000	1610000	1670000	1660000	1680000	1600000	1350000	1390000	2020000	1990000	1990000	1970000	1930000	1960000	1890000	1930000	1920000	1910000	1930000	2010000	2150000	1910000	2210000	1860000	1900000	2350000	2550000	2640000	2740000	2670000
	feldspar	metric tons (t) gross weight	2530000	2550000	2720000	2770000	3010000	2630000	2800000	2940000	3030000	3110000	3200000	3230000	3520000	3590000	3790000	4030000	4120000	4380000	4840000	5180000	5990000	5670000	5990000	6170000	6490000	7910000	8290000	8650000	9330000	9980000	9540000	11800000	14100000	13600000	15100000	16800000	20600000	21600000	22300000	19000000	21600000	21200000	20700000	21800000	22900000	22700000
	ferro-alloys
	fluorspar	metric tons (t) gross weight	4190000	4760000	4530000	4580000	4860000	4520000	4320000	4380000	4670000	4610000	5010000	5100000	4530000	4230000	4830000	4980000	4850000	4600000	5280000	5560000	5120000	4300000	4120000	4180000	3750000	4040000	4180000	4180000	4430000	4300000	4450000	4590000	4450000	4850000	5220000	5360000	5660000	5720000	6920000	6290000	7000000	9080000	6870000	6330000	6720000	6670000
	gallium, primary	metric tons (t) gallium content	NA	NA	NA	16	10	11	14	12.4	12.2	12.1	17.6	18.7	18.6	25.4	33.5	36.1	45.5	38.7	37	40	37	43.1	41	51	53	61.5	54	74.5	93.3	75	90	81	61	70	60	69	73	95	111	79	182	292	383	348	438	469
	germanium metal	metric tons (t) germanium content	84.4	68	72.6	74.8	76.2	125	79.4	89.8	99	109	116	125	124	85	75	80	80	82	84	82	76	80	65	50	50	45	53	63	56	58	70	70	50	44	87	90	90	100	140	120	118	118	150	155	165	160
	gold, mine	metric tons (t) gold content	1480	1450	1390	1350	1250	1200	1210	1210	1210	1210	1220	1280	1340	1400	1460	1530	1610	1660	1870	2010	2180	2160	2260	2280	2260	2230	2290	2450	2500	2570	2590	2600	2550	2540	2420	2470	2370	2350	2300	2490	2590	2680	2750	2920	3020	3100
	graphite	metric tons (t) gross weight	393000	394000	361000	395000	497000	451000	449000	493000	534000	626000	597000	589000	562000	604000	625000	584000	625000	643000	575000	1010000	946000	771000	670000	648000	517000	584000	555000	685000	651000	692000	846000	816000	932000	999000	1010000	1030000	1020000	1120000	1050000	746000	1040000	1190000	1180000	1130000	1190000	1190000
	gypsum	metric tons (t) gross weight	51600000	53100000	57600000	61500000	61400000	59200000	66100000	74500000	77800000	80400000	78400000	76200000	72500000	80700000	85800000	87000000	88200000	93100000	101000000	104000000	104000000	100000000	98800000	97200000	96300000	98400000	104000000	107000000	104000000	109000000	108000000	105000000	111000000	114000000	145000000	147000000	160000000	167000000	157000000	232000000	241000000	243000000	244000000	252000000	260000000	260000000
	indium, refinery	metric tons (t) indium content	NA	NA	68.4	54.1	56	46.7	46.5	40.4	44.5	46.7	49.8	43.5	49.8	23.3	29.5	29.5	41.1	53.5	106	115	118	140	140	140	145	239	200	230	230	215	335	408	406	381	392	607	638	631	678	670	664	720	784	819	881	769
	iodine	metric tons (t) gross weight	8260	9360	9740	10900	10400	10800	11000	10300	10400	11100	11600	12000	12300	12500	12400	12800	13000	12700	14900	16300	16000	17300	16500	16100	14300	13400	14100	15700	18600	18400	19500	20700	21000	24600	24800	26500	26700	26300	26000	26500	26000	26200	27800	30800	29600	30600
	iron ore	metric tons (t) gross weight	757000000	767000000	757000000	832000000	881000000	888000000	886000000	844000000	833000000	898000000	884000000	843000000	783000000	728000000	823000000	845000000	855000000	869000000	967000000	999000000	982000000	956000000	930000000	953000000	982000000	1020000000	1020000000	1040000000	1050000000	1020000000	969000000	937000000	982000000	1080000000	1200000000	1320000000	1470000000	1680000000	1730000000	1710000000	1870000000	2030000000	2070000000	2230000000	2330000000	2280000000
	pig iron	metric tons (t)	431000000	430000000	454000000	501000000	512000000	479000000	498000000	488000000	506000000	532000000	514000000	502000000	457000000	463000000	495000000	499000000	495000000	509000000	539000000	546000000	531000000	509000000	503000000	507000000	516000000	536000000	516000000	540000000	535000000	539000000	573000000	585000000	608000000	673000000	720000000	802000000	881000000	956000000	931000000	919000000	1040000000	1100000000	1120000000	1170000000	1180000000	1160000000
	steel	metric tons (t)	594000000	581000000	629000000	698000000	708000000	644000000	674000000	673000000	715000000	745000000	716000000	707000000	644000000	663000000	711000000	718000000	713000000	734000000	780000000	784000000	771000000	737000000	724000000	730000000	730000000	752000000	751000000	797000000	770000000	784000000	850000000	852000000	907000000	974000000	1060000000	1140000000	1250000000	1350000000	1330000000	1230000000	1430000000	1520000000	1520000000	1620000000	1670000000	1610000000
	kaolin	metric tons (t) gross weight	14106732	13560235	14167802	15880460	16242536	13961307	15142314	15905431	16409483	18756976	18198911	18409987	17290888	17837152	19655165	19023793	20439600	20659848	22736067	22802248	23176943	24103267	19720641	18751732	17923636	19014649	19076503	19082706	19205341	19832497	20025315	20062744	20930089	21468478	25542416	26138237	26255255	25820960	26091363	23456935	25928457	23365914	22890577	22297307	22856528	22926779	22847582
	lead, mine	metric tons (t) lead content	3390000	3490000	3450000	3490000	3490000	3440000	3690000	3410000	3460000	3510000	3520000	3350000	3450000	3350000	3200000	3390000	3240000	3430000	3420000	3400000	3370000	3260000	3200000	2900000	2800000	2710000	2920000	3100000	3060000	3080000	3200000	3120000	2850000	3200000	3150000	3470000	3630000	3710000	3880000	3780000	4160000	4750000	5080000	5430000	5440000	4950000
	lead, refined
	lithium minerals	metric tons (t) gross weight	73100	73400	19700	79300	113000	122000	75000	74300	81900	76000	92800	90200	83600	93700	108000	122000	132000	139000	154000	173000	163000	149000	156000	127000	128000	177000	214000	213000	178000	188000	204000	210000	217000	256000	261000	342000	392000	378000	449000	366000	481000	610000	634000	582000	587000	604000
	magnesite	metric tons (t) gross weight	8720000	8970000	8830000	9070000	9870000	9640000	9070000	9960000	10200000	10900000	11500000	11300000	11400000	11300000	11800000	12200000	12300000	12000000	12000000	12000000	10500000	9790000	10200000	8280000	9020000	10600000	11000000	10100000	11400000	9830000	12700000	11100000	14100000	14100000	16500000	15600000	14400000	20300000	21200000	18300000	21600000	27700000	24200000	25400000	29400000	27700000
	magnesium metal, primary	metric tons (t) magnesium content	220000	232000	234000	240000	130000	235000	249000	257000	288000	307000	316000	308000	254000	260000	328000	325000	322000	324000	334000	344000	354000	342000	295000	269000	282000	395000	378000	384000	396000	341000	422000	420000	432000	509000	595000	622000	675000	751000	670000	588000	765000	806000	840000	909000	1000000	972000
	manganese ore	metric tons (t) manganese content	8200000	9070000	9080000	9740000	9270000	9810000	10000000	8690000	8690000	9800000	9670000	8400000	8580000	7780000	8600000	8690000	8830000	8340000	8650000	9250000	9080000	7600000	7260000	7070000	6530000	7970000	8180000	7520000	7330000	6390000	6960000	7580000	7800000	8790000	9900000	11000000	11500000	12000000	13400000	11300000	14700000	15400000	15500000	17500000	17400000	17500000
	mercury		9790	10400	9620	9250	8880	8700	8090	6580	6250	6010	6810	7270	6820	6230	6740	6140	7780	5530	6840	6750	4100	2540	1960	1730	1960	3190	2560	2410	1580	1320	1360	1500	1490	1730	1900	1520	1150	1200	1820	1880	2180	1970	1830	2320	2750	3270
	mica	metric tons (t) gross weight	185480	189754	205264	213605	203129	202594	198181	205790	219889	215410	212277	236166	205380	239363	263969	237575	254196	267298	256454	252427	243870	246923	214588	209590	280466	300262	288976	299619	271458	266678	327295	355487	253168	271458	335854	298112	326462	344226	377466	300309	347781	336804	337549	349783	774762	807905	801726
	molybdenum, mine	metric tons (t) molybdenum content	82300	77600	79300	81700	84200	81800	88700	95100	100000	104000	111000	109000	95000	63800	97700	98400	93200	99500	113000	136000	127000	115000	114000	99200	108000	136000	127000	138000	135000	129000	135000	132000	122000	131000	159000	186000	186000	212000	221000	221000	246000	264000	256000	258000	268000	235000
	nepheline syenite	metric tons (t) gross weight	696497	739287	672555	716867	771968	669280	3156728	3284570	3330394	3346830	3331339	3304885	3262889	3242814	2346371	2309651	2323912	2412789	2430665	2498295	2490000	2396966	1062864	1027417	1011202	1057143	1878424	2003938	1919533	1923592	1865000	1998362	2067037	2051279	2115055	2071000	2035000	2077000	5752000	5683000	6808000	6545000	6915700	6646600	6337300	5985900	6189100
	nickel, mine	metric tons (t) nickel content	628000	637000	611000	710000	770000	802000	792000	828000	658000	686000	779000	726000	621000	673000	773000	813000	852000	891000	952000	987000	974000	1010000	1010000	928000	932000	1040000	1060000	1140000	1180000	1170000	1290000	1350000	1350000	1370000	1350000	1460000	1570000	1740000	1630000	1410000	1710000	2340000	2570000	2790000	2350000	2280000
	nickel, refined
	perlite	metric tons (t) gross weight	NA	NA	NA	NA	NA	NA	1270000	1360000	1430000	1470000	1530000	1680000	1660000	1540000	1630000	1630000	1700000	1790000	1850000	1850000	1580000	1490000	1740000	1540000	1650000	1800000	1830000	1900000	1820000	1960000	1940000	1730000	1810000	1810000	1870000	1790000	1800000	1760000	3210000	2220000	2130000	4590000	4400000	4340000	4330000	4380000
	phosphate rock	metric tons (t) gross weight	95100000	94000000	101000000	111000000	123000000	109000000	109000000	121000000	127000000	134000000	147000000	145000000	129000000	143000000	154000000	151000000	141000000	147000000	166000000	163000000	162000000	150000000	139000000	119000000	127000000	130000000	135000000	143000000	144000000	137000000	132000000	126000000	136000000	138000000	142000000	152000000	151000000	160000000	166000000	162000000	183000000	200000000	216000000	232000000	237000000	241000000
platinum group	Iridium	kilograms (metal content)	39	15	18	30	12	7	8	18.4286	18.4286	18.4286	18.4286	18.4286	18.4286	18.4286	18.4286	18.4286	18.4286	18.4286	18.4286	18.4286	18.4286	18.4286	18.4286	18.4286	18.4286	18.4286	18.4286	18.4286	18.4286	18.4286	18.4286	18.4286	18.4286	18.4286	18.4286	18.4286	18.4286	18.4286	18.4286	18.4286	18.4286	18.4286	18.4286	18.4286	18.4286	18.4286	18.4286
	Osmium	kilograms (metal content)	4	5	5	5	2	1	1	3.28571	3.28571	3.28571	3.28571	3.28571	3.28571	3.28571	3.28571	3.28571	3.28571	3.28571	3.28571	3.28571	3.28571	3.28571	3.28571	3.28571	3.28571	3.28571	3.28571	3.28571	3.28571	3.28571	3.28571	3.28571	3.28571	3.28571	3.28571	3.28571	3.28571	3.28571	3.28571	3.28571	3.28571	3.28571	3.28571	3.28571	3.28571	3.28571	3.28571
	Osmiridium	kilograms (metal content)	87	99	93	87	78	75	75	84.8571	84.8571	84.8571	84.8571	84.8571	84.8571	84.8571	84.8571	84.8571	84.8571	84.8571	84.8571	84.8571	84.8571	84.8571	84.8571	84.8571	84.8571	84.8571	84.8571	84.8571	84.8571	84.8571	84.8571	84.8571	84.8571	84.8571	84.8571	84.8571	84.8571	84.8571	84.8571	84.8571	84.8571	84.8571	84.8571	84.8571	84.8571	84.8571	84.8571
	Palladium	kilograms (metal content)	491	540	663	850	922	1127	1055	1159	1156	1077	1580	1460	1459	76840	78754	81398	98933	104289	107353	106846	107201	105728	77109	87796	116207	146204	189371	221279	258870	245558	238650	224991	158431	193169	262886	262741	245032	263609	224710	219651	226891	228730	206274	206200	186153	203790	210211
	Platinum	kilograms (metal content)	131297	126428	130308	161939	178776	93594	97349	14916	11190	6642	13331	12381	7724	36006	40567	44027	38983	39430	40096	39368	39733	37601	29909	28333	39180	47770	233902	151731	168508	146904	158844	183599	181462	196279	199116	214692	215951	213242	190744	182090	191808	199138	178190	191128	146807	190571	188794
	Rhodium	kilograms (metal content)	2	3	2	3	1	1	1	1.85714	1.85714	1.85714	1.85714	1.85714	1.85714	1.85714	1.85714	1.85714	1.85714	1.85714	1.85714	1.85714	1.85714	1.85714	1.85714	1.85714	1.85714	1.85714	1.85714	1.85714	1.85714	1.85714	1.85714	1.85714	1.85714	1.85714	1.85714	1.85714	1.85714	1.85714	1.85714	1.85714	1.85714	1.85714	1.85714	1.85714	1.85714	1.85714	1.85714
	unspecified	kilograms (metal content)	20	19	20	23	20	83137	87672	180123	184624	194372	197874	201392	201590	83819.6	106763	115256	123541	128553	132426	134551	143123	144357	154739	177781	184901	183962	563.571	297.571	302.571	379.571	230.571	564.571	552.571	732.571	1100.57	973.571	1329.57	1417.57	1261.57	820.571	888.571	1122.57	1351.57	1395.57	1026.57	752.571	808.571
	others then	kilograms (metal content)	0	0	0	0	0	0	0	0	0	0	0	0	0	0	0	0	1462	666	1613	1246	1396	586	3807	3940	4410	3300	4100	33057	31341	39741	46133	41701	45761	52497	51669	62780	58113	63204	58617	59346	61428	63273	56800	57533	42910	60211	61132
	potash	metric tons (t) K2O	18200000	19900000	20000000	18900000	21100000	24700000	24300000	25200000	26100000	25700000	27900000	27100000	24500000	27400000	29300000	29200000	28800000	30500000	31800000	29300000	27500000	26100000	23900000	20400000	23100000	24700000	23900000	25500000	26000000	27200000	27000000	26400000	27100000	28600000	32100000	33800000	30400000	34900000	33700000	20800000	33900000	35800000	32800000	35600000	40800000	40600000
Rare earth minerals	Monazite
	Xenotime
	Bastnaesite
	Loparite
	unspecified
	rare earth oxides	metric tons (t) rare-earth oxide equivalent	15900	16400	18200	24000	25600	22100	19700	24500	26500	28800	27300	30600	26600	31400	41400	43500	39900	46900	55300	60700	52900	41700	50100	46700	55100	74300	79700	68300	77100	86600	90900	94500	98200	97100	102000	122000	137000	124000	132000	135000	101000	104000	105000	107000	125000	130000
	rhenium	metric tons (t) rhenium content	NA	NA	NA	6.53	6.49	4.26	5.9	4.58	7.12	7.26	9.5	13.7	13.5	9.6	15.2	18.4	19	24.4	26.7	35.2	33.6	36.6	32	24.2	26.7	28.2	22.7	35.6	33.2	35.3	36	33.1	31.6	38.3	42.9	47.3	46.7	44.8	53.1	42.7	41.6	46.7	50.9	46.6	47.1	49.4
	salt	metric tons (t) gross weight	146000000	144000000	146000000	155000000	166000000	162000000	161000000	157000000	168000000	173000000	169000000	171000000	164000000	159000000	173000000	173000000	175000000	179000000	186000000	192000000	183000000	202000000	185000000	187000000	191000000	199000000	204000000	221000000	200000000	210000000	195000000	199000000	214000000	225000000	235000000	249000000	261000000	261000000	261000000	265000000	269000000	272000000	259000000	273000000	272000000	271000000
	selenium, refined	metric tons (t) selenium content	1310	1140	1230	1220	1210	1180	1110	1380	1440	1620	1280	1290	1120	1400	1490	1320	1400	1420	1680	1600	1770	1640	1770	1740	2160	2070	2250	1720	1470	1410	1460	1470	1480	1570	1440	2020	2090	2240	2260	2160	2150	2180	2220	2170	2250	2200
	sillimanite minerals	metric tons (t) gross weight	321794	264985	301529	361470	304163	311486	332850	372900	358069	397283	513539	482310	441975	420842	458830	658863	631160	671919	711336	751139	743776	647751	481126	352279	378529	389358	422723	414049	537006	310796	453965	584172	339275	351820	432306	447628	431646	493502	417404	420392	457962	521495	481513	523663	502740	520850	508892
	silver, mine	metric tons (t) silver content	9360	9170	9380	9700	9260	9430	9840	10300	10700	10800	10700	11200	11500	12100	13100	13100	13000	14000	15500	16400	16600	15600	14900	14100	14000	14900	15100	16500	17200	17600	18100	18700	18800	18800	20000	20800	20100	20800	21300	22300	23300	23300	24300	25700	26800	25100
	sodium carbonate, natural	metric tons (t) gross weight	19100000	19800000	20500000	21400000	22400000	23400000	26100000	26400000	27200000	28200000	28300000	28000000	26800000	27900000	29200000	29100000	29400000	30200000	31300000	31500000	32000000	31200000	30700000	29500000	29600000	31700000	31800000	33100000	32600000	33500000	34500000	35900000	37200000	37100000	39700000	41100000	43700000	46200000	46700000	42100000	46700000	50000000	51700000	51300000	52700000	53400000
	strontium minerals	metric tons (t) strontium content	59900	112000	100000	93300	98400	53100	69400	95300	92600	95800	95000	125000	139000	152000	140000	163000	153000	183000	226000	275000	240000	199000	195000	201000	274000	311000	306000	264000	264000	358000	396000	399000	444000	492000	525000	509000	524000	518000	390000	369000	325000	379000	376000	344000	350000	354000
	sulphur and pyrites	metric tons (t) sulfur content	41900000	42700000	45500000	48200000	51200000	50700000	50900000	52300000	52100000	53200000	55000000	53600000	50600000	49800000	52500000	53800000	53700000	57000000	59200000	58900000	57800000	54600000	50700000	51600000	53400000	54800000	55200000	56900000	57400000	57400000	59300000	59500000	62000000	64100000	66400000	68500000	67000000	67800000	68000000	68300000	69800000	69900000	69800000	68000000	69000000	68900000
	talc	metric tons (t) gross weight	4820000	4740000	4830000	5400000	5810000	4900000	5270000	6090000	6400000	6870000	7540000	7270000	7060000	7060000	7570000	7830000	7760000	8470000	8810000	9240000	9370000	9060000	8500000	8420000	8260000	8490000	9880000	10400000	9410000	9470000	8730000	9060000	8030000	7800000	7850000	7950000	7770000	7730000	7800000	6870000	7280000	7730000	7800000	8490000	8360000	8400000
tantalum and niobium minerals	tantalum and niobium minerals
	Niobium	metric tons (t) niobium content	8460	3740	5950	14700	9340	7860	9470	8800	9670	14400	15100	14800	10600	8580	13900	14800	14600	9360	16900	14100	15300	15700	15300	12400	15700	15600	16200	20500	26200	24600	24800	31100	33300	40400	27600	43100	52800	62200	106000	67100	49100	50200	62700	57100	68600	64300
	Tantalum	metric tons (t) tantalum content	318	496	371	384	436	411	339	409	362	476	544	403	284	313	315	315	215	275	292	395	396	477	399	292	333	361	436	562	779	656	1070	1180	1340	1390	1430	1380	859	1060	1500	956	922	947	1100	1180	1150	1170
	tellurium, refined	metric tons (t) tellurium content	166	145	180	202	212	155	100	133	152	147	110	105	100	86.6	100	100	85.4	73.8	69.3	65	67.4	82.9	97.6	88.2	117	175	122	109	123	116	110	109	89	95	95	95	95	95	95	95	95	95	95	95	95	95
	tin, mine	metric tons (t) tin content	232000	235000	244000	238000	233000	222000	218000	231000	241000	245000	245000	238000	219000	197000	188000	181000	173000	180000	205000	233000	221000	201000	191000	190000	178000	201000	220000	241000	231000	245000	278000	246000	233000	258000	298000	296000	293000	301000	258000	237000	266000	268000	254000	246000	285000	291000
	tin, smelter
Titanium minerals	Ilmenite	metric tons (t) gross weight	4510710	4330286	4332003	4602333	2712463	2769223	3255450	4762182	5457644	5058416	5584710	5723665	4663602	4768649	5454634	6291531	6689069	7169434	7171917	8096035	8637609	7201638	8398809	8422843	7886079	8055869	8111834	8535607	9256222	9025753	9117821	9396416	9265023	9150797	9749275	9286769	10662889	11031395	10776934	9693627	10161724	11368012	11801862	12094308	11455573	10709428	10046221
	Rutile	metric tons (t) gross weight	419819	392123	318671	341061	327699	355165	406825	346917	303044	355789	387593	263075	246009	261334	284862	318020	338629	408966	417189	424331	512887	476614	510848	540706	565181	423832	307608	367529	491215	436844	484653	499717	483735	414118	415255	444252	569595	645236	663480	613842	790657	818825	831196	1243619	780674	761854	746634
	Leucoxene		10593	14560	10730	11097	14782	16871	12223	10621	16103	22470	23943	19261	19739	13358	32498	14297	14940	12090	14744	18030	19120	20004	20045	21106	33077	31000	30000	32000	32000	33000	37000	30000	38000	57000	44000	62000	135000	164000	126000	137000	160000	200000	228000	225500	241663	251311	259664
	Titanium slag	metric tons (t) gross weight	0	0	0	0	844750	749850	814060	0	0	0	0
	unspecified		0	0	0	0	307000	0	0	0	0	0	272310	267545	211000	213000	228000	255000	255000	317000	350000	415000	0	0	0	0	0	0	400000	800000	800000	600000	400000	500000	400000	509300	511670	510000	313500	315700	216000	217000	217000	317021	217000	217000	117000	217000	117000
	tungsten, mine	metric tons (t) tungsten content	32400	35400	38500	37900	37600	38300	38000	41100	46100	48600	52000	50300	47000	40900	46200	46600	43500	42500	50900	51000	51900	48200	42900	34300	34000	38500	34700	33200	37000	37700	44000	50800	47000	47200	66300	59500	56600	53600	61900	61200	68400	73900	76900	83800	87000	89400
	uranium	metric tons (t) uranium content	18061	18696	19599	19834	19061	20383	23714	28064	34652	39482	43978	43891	41280	36384	37899	34740	37250	36659	36772	35390	41963	40439	35789	32266	31268	32636	34669	35414	33399	30711	34547	36066	37064	36183	40432	42037	39457	41372	43856	50571	53445	53715	59251	59272	56190	60516	62213
	vanadium, mine	metric tons (t) vanadium content	14900	15800	15500	16000	20400	21600	29200	29000	29400	37700	35900	35300	27200	27200	31100	31000	32000	32000	33000	33000	33200	26400	26700	25000	32000	36000	35100	37100	42700	36300	41000	41800	51000	47900	51900	56400	57900	58500	61600	58800	71700	71500	74900	80400	82600	77800
	vermiculite	metric tons (t) gross weight	391000	416000	465000	498000	505000	533000	523000	520000	542000	540000	538000	523000	508000	444000	494000	505000	621000	659000	644000	615000	572000	513000	456000	490000	485000	486000	280000	301000	328000	541000	521000	431000	498000	491000	513000	521000	512000	510000	413000	409000	427000	394000	370000	378000	395000	410000
	wollastonite	metric tons (t) gross weight	73300	76700	70500	68700	71100	69600	73900	75600	85600	103000	113000	114000	105000	103000	118000	119000	128000	145000	185000	221000	271000	286000	302000	351000	413000	514000	533000	575000	598000	601000	525000	605000	575000	575000	575000	600000	600000	600000	600000	530000	514000	526000	523000	530000	715000	720000
	zinc, mine	metric tons (t) zinc content	5460000	5520000	5440000	5710000	5780000	5850000	5690000	5920000	5850000	5990000	5950000	5950000	6130000	6280000	6520000	6760000	6840000	7190000	6770000	6820000	7150000	7270000	7250000	6910000	7050000	7280000	7480000	7540000	7570000	7960000	8770000	8910000	8880000	9520000	9600000	10000000	10300000	11100000	11900000	11600000	12300000	12500000	12900000	13100000	13300000	12800000
	zinc, refined
	zirconium minerals	metric tons (t) gross weight	399000	432000	369000	379000	397000	418000	448000	505000	525000	629000	680000	645000	710000	666000	736000	815000	741000	753000	929000	979000	852000	795000	856000	796000	897000	918000	894000	830000	732000	673000	731000	750000	973000	1040000	1070000	1060000	1240000	1420000	1350000	1210000	1280000	1660000	1420000	1070000	1620000	1520000
	KYANITE AND RELATED MATERIALS	metric tons (t) gross weight	200000	190000	180000	200000	180000	190000	230000	250000	240000	290000	350000	330000	290000	240000	280000	340000	300000	340000	380000	410000	400000	310000	320000	270000	280000	280000	300000	350000	460000	360000	406000	424000	353000	388000	435000	420000	416000	475000	423000	341000	344000	357000	333000	360000	380000	410000
	LIME	metric tons (t) gross weight	97000000	100000000	102000000	107000000	110000000	105000000	108000000	117000000	120000000	118000000	120000000	117000000	109000000	110000000	117000000	123000000	124000000	127000000	134000000	139000000	136000000	133000000	133000000	123000000	118000000	120000000	121000000	118000000	117000000	116000000	121000000	121000000	221000000	236000000	251000000	270000000	285000000	302000000	306000000	295000000	310000000	330000000	350000000	350000000	360000000	350000000
	NITROGEN (FIXED)	metric tons (t) nitrogen content	38800000	41100000	43000000	46700000	48400000	49500000	56900000	62000000	67200000	71100000	73600000	77000000	75900000	80400000	88600000	91000000	91100000	95100000	99300000	99300000	97500000	93800000	93400000	91600000	93800000	100000000	105000000	103000000	104000000	107000000	108000000	105000000	109000000	110000000	117000000	122000000	125000000	131000000	128000000	128000000	132000000	139000000	139000000	144000000	140000000	141000000
	SILICON	metric tons (t) silicon content	1640000	1570000	1670000	1780000	1800000	2100000	2320000	2260000	2550000	2840000	2750000	2600000	2410000	2540000	2730000	2830000	2740000	2760000	2990000	3380000	4130000	3950000	3470000	3200000	3170000	3100000	3200000	3400000	3200000	3400000	3500000	3500000	3720000	4390000	4900000	5310000	5650000	6330000	6510000	6260000	6930000	7370000	7770000	7880000	8110000	7630000
	SODIUM SULFATE	metric tons (t) gross weight	NA	NA	3760000	4030000	4130000	4440000	4460000	4090000	5240000	5500000	4530000	4600000	4380000	4310000	4400000	4490000	4590000	4900000	4860000	4870000	5000000	4840000	4300000	4980000	5180000	5310000	5370000	5520000	5600000	5750000	5750000	5750000	5750000	5750000	5750000	5750000	5750000	5750000	5750000	6000000	6000000	8000000	8000000	8000000	8000000	8000000
	QUARTZ CRYSTAL (INDUSTRIAL)	metric tons (t) gross weight	75.8	176	177	177	181	177	181	181	363	1820	1910	79.4	90.7	272	1130	454	544	454	363	800	423	454	778	500	544	435	435	450	450	450	475	500	535	535	535	535	535	535	535	535	535	535	535	535	535	535
	THALLIUM	metric tons (t) thallium content	NA	NA	NA	NA	NA	NA	NA	NA	NA	NA	13	13	13	13	14	15	15	15	16	16	15	15	15	15	15	15	15	15	15	15	15	15	15	12	10	10	10	10	10	10	10	10	10	10	10	10
platinum group
	unspecified	kilograms (metal content)	20	19	20	23	20	83137	87672	180231	184732	194480	197982	201500	201698	83928	106871	115364	123649	128661	132534	134659	143231	144465	154847	177889	185009	184070	672	406	411	488	339	673	661	841	1209	1082	1438	1526	1370	929	997	1231	1460	1504	1135	861	917

## Sheet: prod USGS(+BGS) kg elements
production as element in kg						based on USGS data			rare earth, aggragated data are split up based on Adibi, N. , Z. Lafhaj and J. Payet (in prep)
									data taken from EU report Study on the review of the list of Critical Raw Materials. EU, 2017: data are the average over the period 2010-2014; and are assumed to be also applicable for the previous long term 1970-2009
									production data for Al, Ca, F, H, Fe, Mg, Mn, O, P, K, Si, Na, Ti, S are the sum of a number of dedicated and non dedicated mineral extractions
									1970	1971	1972	1973	1974	1975	1976	1977	1978	1979	1980	1981	1982	1983	1984	1985	1986	1987	1988	1989	1990	1991	1992	1993	1994	1995	1996	1997	1998	1999	2000	2001	2002	2003	2004	2005	2006	2007	2008	2009	2010
No.		Name	Sym.	cas no.	group	initial emission or extraction	unit	Name
89	*	Actinium	Ac	7440-34-8	element	resources	kg	Actinium
13		Aluminium	Al	7429-90-5	element	resources	kg	Aluminium	#VALUE!	#VALUE!	#VALUE!	#VALUE!	#VALUE!	#VALUE!	1.76025e+10	1.90544e+10	1.95833e+10	2.0671e+10	2.15099e+10	2.12963e+10	1.92372e+10	1.98091e+10	2.20429e+10	2.20536e+10	2.22932e+10	2.35452e+10	2.61406e+10	2.67422e+10	2.7207e+10	2.76986e+10	4.61911e+10	4.65769e+10	4.77023e+10	4.72773e+10	4.63155e+10	4.77648e+10	2.02042e+11	2.35475e+11	2.333e+11	2.21955e+11	2.27182e+11	2.29712e+11	2.44773e+11	2.62858e+11	2.78379e+11	2.85063e+11	2.82839e+11	2.52497e+11	2.45807e+11
95	*	Americium	Am					Americium
51		Antimony	Sb	7440-36-0	element	resources	kg	Antimony	70000000	64100000	68100000	69300000	70500000	67900000	69200000	72200000	68800000	71900000	67200000	59200000	53800000	48400000	53400000	55000000	59900000	56100000	64400000	68400000	60400000	64700000	76000000	73000000	106000000	103000000	156000000	155000000	117000000	108000000	118000000	157000000	118000000	116000000	142000000	172000000	173000000	180000000	185000000	158000000	182000000
18		Argon	Ar	7440-37-1	element	resources	kg	Argon
33		Arsenic	As	7440-38-2	element	resources	kg	Arsenic	37500000	37800000	31400000	35200000	37200000	30700000	26100000	23200000	23300000	22400000	23600000	33100000	34500000	31900000	35600000	40300000	39600000	47200000	40400000	49400000	40400000	34800000	34700000	31900000	35400000	35600000	32500000	31800000	30500000	31600000	47500000	45000000	47200000	52800000	43800000	45400000	46100000	40800000	38900000	36600000	31400000
85	*	Astatine	At					Astatine
56		Barium	Ba	7440-39-3	element	resources	kg	Barium	2.31842e+09	2.19485e+09	2.33019e+09	2.79505e+09	2.86566e+09	2.94804e+09	3.15399e+09	3.50705e+09	4.11902e+09	4.21906e+09	4.47208e+09	4.88987e+09	4.3544e+09	3.21872e+09	3.47763e+09	3.62474e+09	2.81859e+09	2.83036e+09	3.33052e+09	3.42467e+09	3.4541e+09	3.27757e+09	2.84801e+09	2.63029e+09	2.63029e+09	2.84213e+09	3.5659e+09	3.93661e+09	3.38348e+09	3.62474e+09	3.86011e+09	3.96603e+09	3.62474e+09	3.98957e+09	4.51327e+09	4.63096e+09	4.6545e+09	4.68392e+09	5.13113e+09	4.14844e+09	4.01311e+09
97	*	Berkelium	Bk					Berkelium
4		Beryllium	Be	7440-41-7	element	resources	kg	Beryllium	138000	174000	174000	197000	144000	204000	262000	265000	264000	302000	230000	233500	233500	233500	233500	233500	233500	233500	233500	233500	233500	233500	233500	233500	233500	233500	233500	233500	233500	233500	233500	233500	233500	233500	233500	233500	233500	233500	233500	233500	233500
83		Bismuth	Bi	7440-69-9	element	resources	kg	Bismuth	3720000	3830000	4000000	3720000	4820000	3980000	3940000	4480000	4250000	3420000	3610000	3750000	4110000	3980000	3480000	4410000	3660000	3170000	3220000	3650000	3440000	3230000	2870000	3550000	3410000	3430000	3600000	4490000	3990000	5490000	3760000	4420000	4600000	5100000	5600000	5400000	5800000	6400000	7500000	7500000	7700000
107	*	Bohrium	Bh					Bohrium
5		Boron	B	7440-42-8	element	resources	kg	Boron	7.98181e+07	8.82036e+07	9.75209e+07	1.06217e+08	1.01869e+08	1.09944e+08	7.26748e+08	8.47873e+08	8.26133e+08	7.82652e+08	8.10604e+08	7.95075e+08	7.05008e+08	6.95691e+08	7.79546e+08	7.79546e+08	7.79546e+08	8.3545e+08	9.28623e+08	9.28623e+08	9.03777e+08	9.19305e+08	8.29238e+08	8.19921e+08	1.1833e+09	1.24852e+09	1.34479e+09	1.42244e+09	1.41933e+09	1.38517e+09	1.42865e+09	1.47213e+09	1.42244e+09	1.47524e+09	1.54046e+09	1.53735e+09	1.12429e+09	1.30442e+09	1.39138e+09	1.11807e+09	1.27957e+09
35		Bromine	Br	7726-95-6	element	resources	kg	Bromine	0	0	0	0	287804000	277546000	311739000	351752000	361063000	402925000	342853000	345511000	383187000	364276000	398084000	381967300	374559400	390615600	370419900	401204200	380605000	380770000	373552000	383703000	424458250	450073240	480786430	550125190	523903000	519268700	543551200	488619660	504927000	482544000	574107000	652555000	668441000	646148640	661236740	592732480	650383000
48		Cadmium	Cd	7440-43-9	element	resources	kg	Cadmium	16500000	15400000	16700000	17200000	17300000	15200000	17000000	18300000	17300000	18700000	18200000	17400000	16400000	17600000	19600000	19100000	19100000	19000000	21900000	21400000	20200000	20900000	19600000	18700000	18200000	20100000	18900000	20300000	20200000	20000000	20300000	20000000	17800000	18400000	18600000	20100000	19900000	18700000	21600000	20800000	23700000
20		Calcium	Ca	7440-70-2	element	resources	kg	Calcium	8.31325e+10	8.59837e+10	8.84042e+10	9.29827e+10	9.55585e+10	9.12409e+10	9.49611e+10	1.0332e+11	1.06279e+11	1.05656e+11	1.0691e+11	1.04242e+11	9.73765e+10	9.98094e+10	1.06425e+11	1.10837e+11	1.11889e+11	1.15117e+11	1.22361e+11	1.26874e+11	1.25015e+11	1.21536e+11	1.20949e+11	1.13911e+11	1.09954e+11	1.12297e+11	1.14571e+11	1.13422e+11	1.12241e+11	1.1291e+11	1.16402e+11	1.15955e+11	1.86504e+11	1.9804e+11	2.16248e+11	2.30469e+11	2.4471e+11	2.59147e+11	2.60364e+11	2.69186e+11	2.83197e+11
98	*	Californium	Cf					Californium
6		Carbon	C					Carbon	393000000	394000000	361000000	395000000	497000000	451000000	449000000	493000000	534000000	626000000	597000000	589000000	562000000	604000000	625000000	584000000	625000000	643000000	575000000	1010000000	946000000	771000000	670000000	648000000	517000000	584000000	555000000	685000000	651000000	692000000	846000000	816000000	932000000	999000000	1010000000	1030000000	1020000000	1120000000	1050000000	746000000	1040000000
58		Cerium	Ce	7440-45-1	element	resources	kg	Cerium	51382000	51382000	51382000	51382000	51382000	51382000	51382000	51382000	51382000	51382000	51382000	51382000	51382000	51382000	51382000	51382000	51382000	51382000	51382000	51382000	51382000	51382000	51382000	51382000	51382000	51382000	51382000	51382000	51382000	51382000	51382000	51382000	51382000	51382000	51382000	51382000	51382000	51382000	51382000	51382000	51382000
55		Cesium	Cs	7440-46-2	element	resources	kg	Cesium	7.25266e+06	7.48073e+06	8.30179e+06	1.09474e+07	1.16772e+07	1.00807e+07	8.986e+06	1.11755e+07	1.20878e+07	1.31369e+07	1.24527e+07	1.3958e+07	1.21334e+07	1.43229e+07	1.88843e+07	1.98422e+07	1.82001e+07	2.13931e+07	2.52247e+07	2.76878e+07	2.41299e+07	1.90211e+07	2.28527e+07	2.13018e+07	2.51334e+07	3.38914e+07	3.63545e+07	3.11545e+07	3.51686e+07	3.95019e+07	4.14633e+07	4.31055e+07	4.47932e+07	4.42914e+07	4.65265e+07	5.56494e+07	6.24915e+07	5.65617e+07	6.02108e+07	6.15792e+07	4.60704e+07
17		Chlorine	Cl	7782-50-5	element	resources	kg	Chlorine	8.85676e+10	8.73543e+10	8.85676e+10	9.40272e+10	1.007e+11	9.82736e+10	9.7667e+10	9.52405e+10	1.01913e+11	1.04947e+11	1.0252e+11	1.03733e+11	9.94869e+10	9.64537e+10	1.04947e+11	1.04947e+11	1.0616e+11	1.08586e+11	1.12833e+11	1.16472e+11	1.11013e+11	1.22539e+11	1.12226e+11	1.13439e+11	1.15866e+11	1.20719e+11	1.23752e+11	1.34065e+11	1.21325e+11	1.27392e+11	1.18292e+11	1.20719e+11	1.29818e+11	1.36491e+11	1.42557e+11	1.5105e+11	1.5833e+11	1.5833e+11	1.5833e+11	1.60756e+11	1.63183e+11
24		Chromium	Cr	7440-47-3	element	resources	kg	Chromium	1910000000	2000000000	1970000000	2030000000	2230000000	2530000000	2430000000	2600000000	2990000000	2590000000	2830000000	2550000000	2390000000	2540000000	2950000000	3180000000	3530000000	3450000000	3870000000	4320000000	3950000000	4060000000	3420000000	3080000000	3090000000	4530000000	3660000000	4330000000	4460000000	4810000000	4750000000	3740000000	4510000000	4770000000	5010000000	5920000000	6080000000	6930000000	7320000000	6010000000	7510000000
27		Cobalt	Co	7440-48-4	element	resources	kg	Cobalt	24200000	25100000	24800000	29400000	30900000	30800000	21400000	21500000	26800000	29900000	31300000	30700000	24600000	37900000	40900000	47400000	50200000	41200000	43800000	42900000	42300000	33300000	28000000	21900000	18000000	24500000	26200000	27400000	36300000	33900000	39300000	46300000	53700000	54600000	60300000	65200000	70000000	73700000	79900000	81200000	110000000
29		Copper	Cu	7440-50-8	element	resources	kg	Copper	5900000000	5940000000	6540000000	6920000000	7100000000	6740000000	7260000000	7420000000	7280000000	7350000000	7200000000	7690000000	7580000000	7610000000	7810000000	7990000000	7940000000	8240000000	8720000000	9040000000	9200000000	9330000000	9470000000	9490000000	9500000000	10000000000	11000000000	11500000000	12100000000	12800000000	13200000000	13700000000	13600000000	13800000000	14700000000	15000000000	15100000000	15500000000	15600000000	16100000000	16100000000
96	*	Curium	Cm					Curium
105	*	Dubnium	Db					Dubnium
66		Dysprosium	Dy	7429-91-6	element	resources	kg	Dysprosium	115515	119147	132224	174362	185986	160558	143122	177994	192524	209234	198336	222311	193251	228123	300774	316030	289876	340732	401758	440990	384322	302953	363980	339279	400305	539794	579026	496204	560137	629155	660394	686549	713429	705438	741037	886338	995314	900868	958989	980784	733772
99	*	Einsteinium	Es					Einsteinium
68		Erbium	Er	7440-52-0	element	resources	kg	Erbium	62295.3	64254.3	71306.6	94030.7	100299	86586.6	77183.5	95989.7	103826	112837	106960	119889	104217	123024	162203	170431	156326	183752	216662	237819	207259	163378	196289	182968	215879	291103	312260	267596	302074	339294	356141	370246	384742	380433	399631	477989	536759	485825	517169	528923	395713
63		Europium	Eu	7440-53-1	element	resources	kg	Europium	45463.2	46892.9	52039.7	68623.7	73198.7	63191	56328.7	70053.4	75772	82348.5	78059.5	87495.3	76058	89782.7	118376	124381	114087	134102	158121	173561	151258	119234	143252	133530	157549	212448	227888	195292	220454	247617	259912	270206	280785	277640	291651	348837	391727	354556	377431	386009	288792
100	*	Fermium	Fm					Fermium
9		Fluorine	F	7782-41-4	element	resources	kg	Fluorine	2.16701e+09	2.45999e+09	2.34326e+09	2.36966e+09	2.51248e+09	2.3379e+09	2.23485e+09	2.26631e+09	2.4164e+09	2.38521e+09	2.59028e+09	2.63855e+09	2.34327e+09	2.19222e+09	2.50237e+09	2.57707e+09	2.51178e+09	2.38459e+09	2.73272e+09	2.8761e+09	2.64949e+09	2.22881e+09	2.1336e+09	2.16397e+09	1.94939e+09	2.09998e+09	2.17087e+09	2.17179e+09	2.29768e+09	2.23053e+09	2.3128e+09	2.38711e+09	2.30636e+09	2.51328e+09	2.70881e+09	2.7774e+09	2.93387e+09	2.96621e+09	3.58511e+09	3.255e+09	3.6236e+09
87	*	Francium	Fr					Francium
64		Gadolinium	Gd	7440-54-2	element	resources	kg	Gadolinium	160070	165104	183225	241615	257723	222487	198326	246649	266784	289938	274837	308060	267790	316113	416786	437928	401685	472157	556722	611085	532560	419807	504372	470143	554709	748001	802364	687597	776189	871829	915118	951360	988609	977535	1.02687e+06	1.22821e+06	1.37922e+06	1.24835e+06	1.32888e+06	1.35909e+06	1.0168e+06
31		Gallium	Ga	7440-55-3	element	resources	kg	Gallium	#VALUE!	#VALUE!	#VALUE!	16000	10000	11000	14000	12400	12200	12100	17600	18700	18600	25400	33500	36100	45500	38700	37000	40000	37000	43100	41000	51000	53000	61500	54000	74500	93300	75000	90000	81000	61000	70000	60000	69000	73000	95000	111000	79000	182000
32		Germanium	Ge	7440-56-4	element	resources	kg	Germanium	84400	68000	72600	74800	76200	125000	79400	89800	99000	109000	116000	125000	124000	85000	75000	80000	80000	82000	84000	82000	76000	80000	65000	50000	50000	45000	53000	63000	56000	58000	70000	70000	50000	44000	87000	90000	90000	100000	140000	120000	118000
79		Gold	Au	7440-57-5	element	resources	kg	Gold	1480000	1450000	1390000	1350000	1250000	1200000	1210000	1210000	1210000	1210000	1220000	1280000	1340000	1400000	1460000	1530000	1610000	1660000	1870000	2010000	2180000	2160000	2260000	2280000	2260000	2230000	2290000	2450000	2500000	2570000	2590000	2600000	2550000	2540000	2420000	2470000	2370000	2350000	2300000	2490000	2590000
72		Hafnium	Hf	7440-58-6	element	resources	kg	Hafnium	72000	72000	72000	72000	72000	72000	72000	72000	72000	72000	72000	72000	72000	72000	72000	72000	72000	72000	72000	72000	72000	72000	72000	72000	72000	72000	72000	72000	72000	72000	72000	72000	72000	72000	72000	72000	72000	72000	72000	72000	72000
108	*	Hassium	Hs					Hassium
2		Helium	He	7440-59-7	element	resources	kg	Helium
67		Holmium	Ho	7440-60-0	element	resources	kg	Holmium	14274.3	14723.2	16339.1	21546.1	22982.5	19840.4	17685.8	21995	23790.5	25855.3	24508.7	27471.3	23880.3	28189.5	37167	39052.3	35820.4	42104.7	49645.8	54493.7	47491.2	37436.4	44977.5	41925.1	49466.3	66703.2	71551	61316.6	69216.9	77745.5	81605.9	84837.8	88159.5	87172	91571	109526	122992	111322	118504	121197	90673.2
1		Hydrogen	H					Hydrogen	1.90248e+09	1.94228e+09	2.06862e+09	2.21619e+09	2.50288e+09	2.38478e+09	2.60615e+09	2.86983e+09	3.01044e+09	3.1245e+09	3.11376e+09	3.06567e+09	2.8787e+09	3.08017e+09	3.28929e+09	3.46592e+09	3.48396e+09	3.63153e+09	3.90946e+09	4.01025e+09	4.00757e+09	3.92143e+09	3.82644e+09	3.63337e+09	3.6017e+09	3.73906e+09	3.84324e+09	3.91727e+09	3.88903e+09	4.03594e+09	4.04985e+09	3.99836e+09	4.56194e+09	4.76226e+09	5.63736e+09	5.78466e+09	6.16692e+09	6.42668e+09	6.20798e+09	7.78671e+09	8.14161e+09
49		Indium	In	7440-74-6	element	resources	kg	Indium	#VALUE!	#VALUE!	68400	54100	56000	46700	46500	40400	44500	46700	49800	43500	49800	23300	29500	29500	41100	53500	106000	115000	118000	140000	140000	140000	145000	239000	200000	230000	230000	215000	335000	408000	406000	381000	392000	607000	638000	631000	678000	670000	664000
53		Iodine	I	7553-56-2	element	resources	kg	Iodine	8260000	9360000	9740000	10900000	10400000	10800000	11000000	10300000	10400000	11100000	11600000	12000000	12300000	12500000	12400000	12800000	13000000	12700000	14900000	16300000	16000000	17300000	16500000	16100000	14300000	13400000	14100000	15700000	18600000	18400000	19500000	20700000	21000000	24600000	24800000	26500000	26700000	26300000	26000000	26500000	26000000
77		Iridium	Ir	7439-88-5	element	resources	kg	Iridium	82.5	64.5	64.5	73.5	51	44.5	45.5	60.8571	60.8571	60.8571	60.8571	60.8571	60.8571	60.8571	60.8571	60.8571	60.8571	60.8571	60.8571	60.8571	60.8571	60.8571	60.8571	60.8571	60.8571	60.8571	60.8571	60.8571	60.8571	60.8571	60.8571	60.8571	60.8571	60.8571	60.8571	60.8571	60.8571	60.8571	60.8571	60.8571	60.8571
26		Iron	Fe	7439-89-6	element	resources	kg	Iron	#VALUE!	#VALUE!	#VALUE!	#VALUE!	#VALUE!	#VALUE!	5.49515e+11	5.2348e+11	5.16666e+11	5.56966e+11	5.48286e+11	5.22869e+11	4.85664e+11	4.51558e+11	5.10438e+11	5.24077e+11	5.30291e+11	5.38977e+11	5.99736e+11	6.19575e+11	6.09028e+11	5.92898e+11	5.8887e+11	6.03466e+11	6.22538e+11	6.45172e+11	6.43891e+11	6.56564e+11	7.56899e+11	7.58126e+11	7.24696e+11	6.97644e+11	7.27399e+11	7.8842e+11	8.70203e+11	9.5426e+11	1.05523e+12	1.18699e+12	1.21528e+12	1.18655e+12	1.27817e+12
36		Krypton	Kr	7439-90-9	element	resources	kg	Krypton
57		Lanthanum	La	7439-91-0	element	resources	kg	Lanthanum	3.88624e+06	4.00845e+06	4.4484e+06	5.86602e+06	6.25709e+06	5.40163e+06	4.81503e+06	5.98823e+06	6.47707e+06	7.03923e+06	6.6726e+06	7.47918e+06	6.50151e+06	7.67471e+06	1.01189e+07	1.06322e+07	9.75226e+06	1.14632e+07	1.35163e+07	1.48361e+07	1.29297e+07	1.01922e+07	1.22453e+07	1.14143e+07	1.34674e+07	1.81602e+07	1.94801e+07	1.66937e+07	1.88446e+07	2.11666e+07	2.22176e+07	2.30975e+07	2.40018e+07	2.37329e+07	2.49306e+07	2.98189e+07	3.34852e+07	3.03078e+07	3.22631e+07	3.29964e+07	2.46862e+07
103	*	Lawrencium	Lr					Lawrencium
82		Lead	Pb	7439-92-1	element	resources	kg	Lead	3390000000	3490000000	3450000000	3490000000	3490000000	3440000000	3690000000	3410000000	3460000000	3510000000	3520000000	3350000000	3450000000	3350000000	3200000000	3390000000	3240000000	3430000000	3420000000	3400000000	3370000000	3260000000	3200000000	2900000000	2800000000	2710000000	2920000000	3100000000	3060000000	3080000000	3200000000	3120000000	2850000000	3200000000	3150000000	3470000000	3630000000	3710000000	3880000000	3780000000	4160000000
3		Lithium	Li	7439-93-2	element	resources	kg	Lithium	3.20112e+06	3.21425e+06	862681	3.47262e+06	4.94838e+06	5.34249e+06	3.28432e+06	3.25367e+06	3.58648e+06	3.32811e+06	4.0638e+06	3.94994e+06	3.66092e+06	4.10321e+06	4.72942e+06	5.34249e+06	5.7804e+06	6.08694e+06	6.7438e+06	7.57583e+06	7.13792e+06	6.52485e+06	6.83139e+06	5.56145e+06	5.60524e+06	7.751e+06	9.37126e+06	9.32747e+06	7.79479e+06	8.2327e+06	8.93335e+06	9.1961e+06	9.50263e+06	1.12105e+07	1.14294e+07	1.49765e+07	1.7166e+07	1.6553e+07	1.96621e+07	1.60275e+07	2.10634e+07
71		Lutetium	Lu	7439-94-3	element	resources	kg	Lutetium	10478.8	10808.3	11994.6	15817.1	16871.6	14564.9	12983.2	16146.6	17464.7	18980.5	17991.9	20166.8	17530.6	20694	27284.5	28668.5	26295.9	30909.2	36445.2	40004	34863.5	27482.2	33018.2	30777.4	36313.4	48967.1	52525.9	45012.8	50812.4	57073.3	59907.2	62279.8	64718.2	63993.3	67222.6	80403.5	90289.2	81721.6	86994	88971.1	66563.6
12		Magnesium	Mg	7439-95-4	element	resources	kg	Magnesium	#VALUE!	#VALUE!	#VALUE!	#VALUE!	#VALUE!	#VALUE!	5.20185e+09	5.63012e+09	5.76638e+09	6.09576e+09	6.39051e+09	6.18061e+09	6.16764e+09	6.10598e+09	6.38586e+09	6.53217e+09	6.49754e+09	6.6092e+09	6.70411e+09	6.77338e+09	6.31082e+09	5.90262e+09	1.08831e+10	1.02124e+10	1.07903e+10	1.09971e+10	1.07894e+10	1.07634e+10	5.02656e+10	5.80323e+10	5.81103e+10	5.46774e+10	5.62022e+10	5.6365e+10	6.02235e+10	6.4013e+10	6.7002e+10	6.94483e+10	6.84266e+10	6.05102e+10	5.85143e+10
25		Manganese	Mn	7439-96-5	element	resources	kg	Manganese	8.20057e+09	9.0706e+09	9.08055e+09	9.74058e+09	9.27063e+09	9.81054e+09	1.00026e+10	8.69267e+09	8.69271e+09	9.80272e+09	9.67271e+09	8.40269e+09	8.58265e+09	7.78264e+09	8.60191e+09	8.69188e+09	8.83189e+09	8.34196e+09	8.65198e+09	9.25203e+09	9.08202e+09	7.60195e+09	7.26086e+09	7.07084e+09	6.53082e+09	7.97086e+09	8.18153e+09	7.52163e+09	7.33156e+09	6.39156e+09	6.96152e+09	7.58163e+09	7.80168e+09	8.79167e+09	9.90172e+09	1.10017e+10	1.15017e+10	1.20017e+10	1.34047e+10	1.13046e+10	1.47055e+10
109	*	Meitnerium	Mt					Meitnerium
101	*	Mendelevium	Md					Mendelevium
80		Mercury	Hg	7439-97-6	element	resources	kg	Mercury	9790000	10400000	9620000	9250000	8880000	8700000	8090000	6580000	6250000	6010000	6810000	7270000	6820000	6230000	6740000	6140000	7780000	5530000	6840000	6750000	4100000	2540000	1960000	1730000	1960000	3190000	2560000	2410000	1580000	1320000	1360000	1500000	1490000	1730000	1900000	1520000	1150000	1200000	1820000	1880000	2180000
42		Molybdenum	Mo	7439-98-7	element	resources	kg	Molybdenum	82300000	77600000	79300000	81700000	84200000	81800000	88700000	95100000	100000000	104000000	111000000	109000000	95000000	63800000	97700000	98400000	93200000	99500000	113000000	136000000	127000000	115000000	114000000	99200000	108000000	136000000	127000000	138000000	135000000	129000000	135000000	132000000	122000000	131000000	159000000	186000000	186000000	212000000	221000000	221000000	246000000
60		Neodymium	Nd	7440-00-8	element	resources	kg	Neodymium	2.46706e+06	2.54464e+06	2.82393e+06	3.72387e+06	3.97212e+06	3.42906e+06	3.05667e+06	3.80145e+06	4.11177e+06	4.46864e+06	4.2359e+06	4.74793e+06	4.12728e+06	4.87206e+06	6.42367e+06	6.74951e+06	6.19093e+06	7.27705e+06	8.58041e+06	9.41828e+06	8.20802e+06	6.47022e+06	7.77357e+06	7.24602e+06	8.54937e+06	1.15285e+07	1.23663e+07	1.05975e+07	1.19629e+07	1.34369e+07	1.41041e+07	1.46627e+07	1.52368e+07	1.50661e+07	1.58264e+07	1.89296e+07	2.12571e+07	1.924e+07	2.04813e+07	2.09467e+07	1.56713e+07
10		Neon	Ne	7440-01-9	element	resources	kg	Neon
93	*	Neptunium	Np					Neptunium
28		Nickel	Ni	7440-02-0	element	resources	kg	Nickel	628000000	637000000	611000000	710000000	770000000	802000000	792000000	828000000	658000000	686000000	779000000	726000000	621000000	673000000	773000000	813000000	852000000	891000000	952000000	987000000	974000000	1010000000	1010000000	928000000	932000000	1040000000	1060000000	1140000000	1180000000	1170000000	1290000000	1350000000	1350000000	1370000000	1350000000	1460000000	1570000000	1740000000	1630000000	1410000000	1710000000
41		Niobium	Nb	7440-03-1	element	resources	kg	Niobium	8460000	3740000	5950000	14700000	9340000	7860000	9470000	8800000	9670000	14400000	15100000	14800000	10600000	8580000	13900000	14800000	14600000	9360000	16900000	14100000	15300000	15700000	15300000	12400000	15700000	15600000	16200000	20500000	26200000	24600000	24800000	31100000	33300000	40400000	27600000	43100000	52800000	62200000	106000000	67100000	49100000
7		Nitrogen	N	7727-37-9	element	resources	kg	Nitrogen	9700000000	10275000000	10750000000	11675000000	12100000000	12375000000	14225000000	15500000000	16800000000	17775000000	18400000000	19250000000	18975000000	20100000000	22150000000	22750000000	22775000000	23775000000	24825000000	24825000000	24375000000	23450000000	23350000000	22900000000	23450000000	25000000000	26250000000	25750000000	26000000000	26750000000	27000000000	26250000000	27250000000	27500000000	29250000000	30500000000	31250000000	32750000000	32000000000	32000000000	33000000000
102	*	Nobelium	No					Nobelium
76		Osmium	Os	7440-04-2	element	resources	kg	Osmium	47.5	54.5	51.5	48.5	41	38.5	38.5	45.7143	45.7143	45.7143	45.7143	45.7143	45.7143	45.7143	45.7143	45.7143	45.7143	45.7143	45.7143	45.7143	45.7143	45.7143	45.7143	45.7143	45.7143	45.7143	45.7143	45.7143	45.7143	45.7143	45.7143	45.7143	45.7143	45.7143	45.7143	45.7143	45.7143	45.7143	45.7143	45.7143	45.7143
8		Oxygen	O	7782-44-7	element	resources	kg	Oxygen	#VALUE!	#VALUE!	#VALUE!	#VALUE!	#VALUE!	#VALUE!	1.3646e+11	1.4838e+11	1.55007e+11	1.59667e+11	1.62515e+11	1.59912e+11	1.5003e+11	1.5747e+11	1.67607e+11	1.72272e+11	1.71932e+11	1.77943e+11	1.91353e+11	1.95206e+11	1.93588e+11	1.87487e+11	2.93567e+11	2.84971e+11	2.96118e+11	2.95839e+11	2.88687e+11	2.95249e+11	1.17185e+12	1.3587e+12	1.34409e+12	1.27459e+12	1.33166e+12	1.34221e+12	1.44023e+12	1.54137e+12	1.62919e+12	1.6609e+12	1.63541e+12	1.50944e+12	1.46144e+12
46		Palladium	Pd	7440-05-3	element	resources	kg	Palladium	501	549.5	673	861.5	932	42695.5	44891	91220.3	93467.8	98262.8	100517	102156	102254	118750	132135	139026	161434	168898	174372	174744	179460	178199	156382	178656	210862	239835	191703	237956	274692	265618	261832	246124	181588	219784	289271	294618	274753	295920	254649	249734	258049
15		Phosphorus	P	7723-14-0	element	resources	kg	Phosphorus	1.28667e+10	1.27179e+10	1.36649e+10	1.50179e+10	1.66414e+10	1.47473e+10	1.47487e+10	1.63722e+10	1.7184e+10	1.81311e+10	1.98899e+10	1.96193e+10	1.74546e+10	1.93487e+10	2.08364e+10	2.04305e+10	1.90775e+10	1.98894e+10	2.24599e+10	2.20541e+10	2.19188e+10	2.02952e+10	1.88062e+10	1.61004e+10	1.71827e+10	1.75886e+10	1.82655e+10	1.9348e+10	1.94832e+10	1.85362e+10	1.78597e+10	1.7048e+10	1.84009e+10	1.86715e+10	1.92127e+10	2.05656e+10	2.04303e+10	2.1648e+10	2.24618e+10	2.19206e+10	2.47624e+10
78		Platinum	Pt	7440-06-4	element	resources	kg	Platinum	131307	126438	130318	161950	178786	135162	141185	104977	103502	103828	112268	113077	108519	77915.8	93948.3	101655	101484	104039	107115	107266	111992	110072	109182	119193	133835	141401	236234	168408	184330	166964	182026	204732	204619	222894	225501	246569	245672	245553	220683	212173	222966
94	*	Plutonium	Pu					Plutonium
84	*	Polonium	Po	7440-08-6	element	resources	kg	Polonium
19		Potassium	K	7440-09-7	element	resources	kg	Potassium	#VALUE!	#VALUE!	#VALUE!	#VALUE!	#VALUE!	#VALUE!	2.05019e+10	2.1265e+10	2.20214e+10	2.16951e+10	2.3527e+10	2.28691e+10	2.07208e+10	2.31275e+10	2.46766e+10	2.46024e+10	2.42782e+10	2.57094e+10	2.6813e+10	2.47567e+10	2.32906e+10	2.21059e+10	2.65312e+10	2.37992e+10	2.662e+10	2.75414e+10	2.62677e+10	2.77595e+10	7.69628e+10	8.82535e+10	8.71274e+10	8.30014e+10	8.46548e+10	8.60113e+10	9.28142e+10	9.93038e+10	1.0079e+11	1.0538e+11	1.03171e+11	8.3815e+10	9.09163e+10
59		Praseodymium	Pr	7440-10-0	element	resources	kg	Praseodymium	763221	787222	873624	1.15203e+06	1.22883e+06	1.06083e+06	945626	1.17603e+06	1.27204e+06	1.38244e+06	1.31044e+06	1.46884e+06	1.27684e+06	1.50724e+06	1.98725e+06	2.08806e+06	1.91525e+06	2.25126e+06	2.65447e+06	2.91368e+06	2.53927e+06	2.00166e+06	2.40487e+06	2.24166e+06	2.64487e+06	3.5665e+06	3.82571e+06	3.27849e+06	3.7009e+06	4.15692e+06	4.36332e+06	4.53613e+06	4.71373e+06	4.66093e+06	4.89614e+06	5.85616e+06	6.57618e+06	5.95216e+06	6.33618e+06	6.48018e+06	4.84813e+06
61	*	Promethium	Pm	???	element	resources	kg	Promethium
91		Protactinium	Pa					Protactinium
88	*	Radium	Ra	7440-14-4	element	resources	kg	Radium
86	*	Radon	Rn	10043-92-2	element	resources	kg	Radon
75		Rhenium	Re	7440-15-5	element	resources	kg	Rhenium	#VALUE!	#VALUE!	#VALUE!	6530	6490	4260	5900	4580	7120	7260	9500	13700	13500	9600	15200	18400	19000	24400	26700	35200	33600	36600	32000	24200	26700	28200	22700	35600	33200	35300	36000	33100	31600	38300	42900	47300	46700	44800	53100	42700	41600
45		Rhodium	Rh	7440-16-6	element	resources	kg	Rhodium	2	3	2	3	1	1	1	1.85714	1.85714	1.85714	1.85714	1.85714	1.85714	1.85714	1.85714	1.85714	1.85714	1.85714	1.85714	1.85714	1.85714	1.85714	1.85714	1.85714	1.85714	1.85714	1.85714	1.85714	1.85714	1.85714	1.85714	1.85714	1.85714	1.85714	1.85714	1.85714	1.85714	1.85714	1.85714	1.85714	1.85714
37		Rubidium	Rb	7440-17-7	element	resources	kg	Rubidium
44		Ruthenium	Ru	7440-18-8	element	resources	kg	Ruthenium	27700	27700	27700	27700	27700	27700	27700	27700	27700	27700	27700	27700	27700	27700	27700	27700	27700	27700	27700	27700	27700	27700	27700	27700	27700	27700	27700	27700	27700	27700	27700	27700	27700	27700	27700	27700	27700	27700	27700	27700	27700
104	*	Rutherfordium	Rf					Rutherfordium
62		Samarium	Sm	7440-19-9	element	resources	kg	Samarium	265683	274038	304116	401032	427767	369283	329180	409386	442806	481238	456173	511315	444477	524683	691780	726870	666715	783683	924044	1.01428e+06	883941	696792	837154	780341	920702	1.24153e+06	1.33176e+06	1.14127e+06	1.28831e+06	1.44706e+06	1.51891e+06	1.57906e+06	1.64089e+06	1.62251e+06	1.70438e+06	2.03858e+06	2.28922e+06	2.072e+06	2.20567e+06	2.2558e+06	1.68767e+06
21		Scandium	Sc	7440-20-2	element	resources	kg	Scandium	9779.49	9779.49	9779.49	9779.49	9779.49	9779.49	9779.49	9779.49	9779.49	9779.49	9779.49	9779.49	9779.49	9779.49	9779.49	9779.49	9779.49	9779.49	9779.49	9779.49	9779.49	9779.49	9779.49	9779.49	9779.49	9779.49	9779.49	9779.49	9779.49	9779.49	9779.49	9779.49	9779.49	9779.49	9779.49	9779.49	9779.49	9779.49	9779.49	9779.49	9779.49
106	*	Seaborgium	Sg					Seaborgium
34		Selenium	Se	7782-49-2	element	resources	kg	Selenium	1310000	1140000	1230000	1220000	1210000	1180000	1110000	1380000	1440000	1620000	1280000	1290000	1120000	1400000	1490000	1320000	1400000	1420000	1680000	1600000	1770000	1640000	1770000	1740000	2160000	2070000	2250000	1720000	1470000	1410000	1460000	1470000	1480000	1570000	1440000	2020000	2090000	2240000	2260000	2160000	2150000
14		Silicon	Si	7440-21-3	element	resources	kg	Silicon	#VALUE!	#VALUE!	#VALUE!	#VALUE!	#VALUE!	#VALUE!	3.37879e+10	3.55869e+10	3.60852e+10	3.84729e+10	3.97226e+10	3.85987e+10	3.62683e+10	3.62757e+10	3.9414e+10	3.94177e+10	4.05667e+10	4.19367e+10	4.4685e+10	4.69178e+10	5.0687e+10	4.98308e+10	4.62733e+10	4.65157e+10	4.56475e+10	4.83211e+10	5.03408e+10	5.23221e+10	5.25242e+10	5.48392e+10	5.6684e+10	5.77896e+10	6.04905e+10	6.3894e+10	6.89637e+10	7.39216e+10	7.95611e+10	8.82786e+10	9.10194e+10	8.38779e+10	9.47189e+10
47		Silver	Ag	7440-22-4	element	resources	kg	Silver	9360000	9170000	9380000	9700000	9260000	9430000	9840000	10300000	10700000	10800000	10700000	11200000	11500000	12100000	13100000	13100000	13000000	14000000	15500000	16400000	16600000	15600000	14900000	14100000	14000000	14900000	15100000	16500000	17200000	17600000	18100000	18700000	18800000	18800000	20000000	20800000	20100000	20800000	21300000	22300000	23300000
11		Sodium	Na	7440-23-5	element	resources	kg	Sodium	#VALUE!	#VALUE!	#VALUE!	#VALUE!	#VALUE!	#VALUE!	7.02999e+10	6.87856e+10	7.3567e+10	7.58676e+10	7.41068e+10	7.47805e+10	7.16434e+10	6.97585e+10	7.56439e+10	7.56085e+10	7.65741e+10	7.84529e+10	8.15041e+10	8.40638e+10	8.09192e+10	8.81796e+10	8.10283e+10	8.20186e+10	8.35735e+10	8.72311e+10	8.94235e+10	9.6471e+10	8.82291e+10	9.25115e+10	8.69098e+10	8.8738e+10	9.50538e+10	9.96223e+10	1.04216e+11	1.10322e+11	1.1587e+11	1.16981e+11	1.17415e+11	1.17974e+11	1.21065e+11
38		Strontium	Sr	7440-24-6	element	resources	kg	Strontium	2.62841e+07	4.91456e+07	43880000	40940040	4.31779e+07	2.33003e+07	30452720	41817640	4.06329e+07	42037040	41686000	54850000	6.09932e+07	6.66976e+07	61432000	7.15244e+07	6.71364e+07	8.03004e+07	99168800	120670000	105312000	8.73212e+07	85566000	88198800	1.20231e+08	1.36467e+08	1.34273e+08	1.15843e+08	1.15843e+08	157090400	1.73765e+08	175081200	194827200	215889600	230370000	223349200	229931200	2.27298e+08	171132000	161917200	142610000
16		Sulfur	S	7704-34-9	element	resources	kg	Sulfur	#VALUE!	#VALUE!	5.76199e+10	6.12157e+10	6.42362e+10	6.34156e+10	6.49533e+10	6.79165e+10	6.87336e+10	7.03998e+10	7.16675e+10	6.99711e+10	6.61074e+10	6.65535e+10	7.02841e+10	7.18622e+10	7.18201e+10	7.61054e+10	7.98844e+10	8.01673e+10	7.91035e+10	7.50813e+10	7.07356e+10	7.14403e+10	7.31178e+10	7.49877e+10	7.66132e+10	7.89923e+10	7.88225e+10	7.98438e+10	8.16126e+10	8.12786e+10	8.48163e+10	8.75602e+10	9.57557e+10	9.82557e+10	9.91822e+10	1.01293e+11	9.97348e+10	1.13829e+11	1.16974e+11
73		Tantalum	Ta	7440-25-7	element	resources	kg	Tantalum	318000	496000	371000	384000	436000	411000	339000	409000	362000	476000	544000	403000	284000	313000	315000	315000	215000	275000	292000	395000	396000	477000	399000	292000	333000	361000	436000	562000	779000	656000	1070000	1180000	1340000	1390000	1430000	1380000	859000	1060000	1500000	956000	922000
43	*	Technetium	Tc					Technetium
52		Tellurium	Te	13494-80-9	element	resources	kg	Tellurium	166000	145000	180000	202000	212000	155000	100000	133000	152000	147000	110000	105000	100000	86600	100000	100000	85400	73800	69300	65000	67400	82900	97600	88200	117000	175000	122000	109000	123000	116000	110000	109000	89000	95000	95000	95000	95000	95000	95000	95000	95000
65		Terbium	Tb	7440-27-9	element	resources	kg	Terbium	20380.1	21020.9	23328.1	30762.4	32813.2	28327	25250.8	31403.2	33966.8	36914.8	34992.2	39222	34095	40247.4	53065.1	55756.8	51142.4	60114.8	70881.6	77803.1	67805.4	53449.6	64216.4	59858.4	70625.3	95235.2	102157	87544.6	98824.1	111001	116512	121127	125869	124459	130740	156375	175602	158939	169193	173038	129458
81		Thallium	Tl	7440-28-0	element	resources	kg	Thallium	#VALUE!	#VALUE!	#VALUE!	#VALUE!	#VALUE!	#VALUE!	#VALUE!	#VALUE!	#VALUE!	#VALUE!	13000	13000	13000	13000	14000	15000	15000	15000	16000	16000	15000	15000	15000	15000	15000	15000	15000	15000	15000	15000	15000	15000	15000	12000	10000	10000	10000	10000	10000	10000	10000
90		Thorium	Th	7440-29-1	element	resources	kg	Thorium
69		Thulium	Tm	7440-30-4	element	resources	kg	Thulium	7013.38	7233.93	8027.9	10586.2	11292	9748.16	8689.54	10806.8	11689	12703.5	12041.8	13497.5	11733.1	13850.3	18261.3	19187.6	17599.6	20687.3	24392.5	26774.4	23333.8	18393.6	22098.8	20599.1	24304.2	32773.2	35155.1	30126.7	34008.3	38198.7	40095.4	41683.3	43315.4	42830.2	44991.5	53813.4	60429.8	54695.6	58224.3	59547.6	44550.4
50		Tin	Sn	7440-31-5	element	resources	kg	Tin	232000000	235000000	244000000	238000000	233000000	222000000	218000000	231000000	241000000	245000000	245000000	238000000	219000000	197000000	188000000	181000000	173000000	180000000	205000000	233000000	221000000	201000000	191000000	190000000	178000000	201000000	220000000	241000000	231000000	245000000	278000000	246000000	233000000	258000000	298000000	296000000	293000000	301000000	258000000	237000000	266000000
22		Titanium	Ti	7440-32-6	element	resources	kg	Titanium	2.15767e+09	2.0682e+09	2.02641e+09	2.15406e+09	1.67729e+09	1.60121e+09	1.86116e+09	2.23426e+09	2.50968e+09	2.37226e+09	2.69307e+09	2.68011e+09	2.20337e+09	2.25327e+09	2.57026e+09	2.94173e+09	3.12261e+09	3.38203e+09	3.3987e+09	3.81687e+09	3.97645e+09	3.34561e+09	3.8691e+09	3.8961e+09	3.68783e+09	3.68196e+09	3.76027e+09	4.09047e+09	4.46437e+09	4.27944e+09	4.28905e+09	4.44117e+09	4.35251e+09	4.3084e+09	4.55717e+09	4.38588e+09	5.0253e+09	5.24096e+09	5.10507e+09	4.62327e+09	4.93631e+09
74		Tungsten	W	7440-33-7	element	resources	kg	Tungsten	32400000	35400000	38500000	37900000	37600000	38300000	38000000	41100000	46100000	48600000	52000000	50300000	47000000	40900000	46200000	46600000	43500000	42500000	50900000	51000000	51900000	48200000	42900000	34300000	34000000	38500000	34700000	33200000	37000000	37700000	44000000	50800000	47000000	47200000	66300000	59500000	56600000	53600000	61900000	61200000	68400000
92		Uranium	U	7440-61-1	element	resources	kg	Uranium	18061000	18696000	19599000	19834000	19061000	20383000	23714000	28064000	34652000	39482000	43978000	43891000	41280000	36384000	37899000	34740000	37250000	36659000	36772000	35390000	41963000	40439000	35789000	32266000	31268000	32636000	34669000	35414000	33399000	30711000	34547000	36066000	37064000	36183000	40432000	42037000	39457000	41372000	43856000	50571000	53445000
23		Vanadium	V	7440-62-2	element	resources	kg	Vanadium	14900000	15800000	15500000	16000000	20400000	21600000	29200000	29000000	29400000	37700000	35900000	35300000	27200000	27200000	31100000	31000000	32000000	32000000	33000000	33000000	33200000	26400000	26700000	25000000	32000000	36000000	35100000	37100000	42700000	36300000	41000000	41800000	51000000	47900000	51900000	56400000	57900000	58500000	61600000	58800000	71700000
54		Xenon	Xe	7440-63-3	element	resources	kg	Xenon
70		Ytterbium	Yb	7440-64-4	element	resources	kg	Ytterbium	63120.4	65105.4	72251.1	95276.2	101628	87733.5	78205.8	97261.1	105201	114331	108377	121477	105598	124653	164351	172688	158397	186185	219532	240969	210005	165542	198889	185392	218738	294959	316396	271140	306075	343788	360858	375150	389838	385471	404924	484320	543868	492260	524019	535928	400954
39		Yttrium	Y	7440-65-5	element	resources	kg	Yttrium	766522	790626	877402	1.15701e+06	1.23415e+06	1.06542e+06	949715	1.18112e+06	1.27754e+06	1.38842e+06	1.3161e+06	1.47519e+06	1.28236e+06	1.51376e+06	1.99585e+06	2.09709e+06	1.92354e+06	2.261e+06	2.66595e+06	2.92628e+06	2.55025e+06	2.01031e+06	2.41527e+06	2.25136e+06	2.65631e+06	3.58192e+06	3.84225e+06	3.29267e+06	3.71691e+06	4.17489e+06	4.38219e+06	4.55574e+06	4.73411e+06	4.68108e+06	4.91731e+06	5.88149e+06	6.60462e+06	5.9779e+06	6.36358e+06	6.5082e+06	4.8691e+06
30		Zinc	Zn	7440-66-6	element	resources	kg	Zinc	5460000000	5520000000	5440000000	5710000000	5780000000	5850000000	5690000000	5920000000	5850000000	5990000000	5950000000	5950000000	6130000000	6280000000	6520000000	6760000000	6840000000	7190000000	6770000000	6820000000	7150000000	7270000000	7250000000	6910000000	7050000000	7280000000	7480000000	7540000000	7570000000	7960000000	8770000000	8910000000	8880000000	9520000000	9600000000	10000000000	10300000000	11100000000	11900000000	11600000000	12300000000
40		Zirconium	Zr	7440-67-7	element	resources	kg	Zirconium	2.95385e+08	3.19816e+08	2.73176e+08	2.80579e+08	2.93905e+08	3.09451e+08	3.31661e+08	3.73859e+08	3.88665e+08	4.65657e+08	5.03413e+08	4.77502e+08	5.25623e+08	4.93049e+08	5.44871e+08	6.03356e+08	5.48573e+08	5.57456e+08	6.87752e+08	7.24767e+08	6.30747e+08	5.8855e+08	6.33709e+08	5.8929e+08	6.64062e+08	6.79608e+08	6.61841e+08	6.14461e+08	5.4191e+08	4.98231e+08	5.41169e+08	5.55235e+08	7.20325e+08	7.69926e+08	7.92136e+08	7.84733e+08	9.17989e+08	1.05125e+09	9.99424e+08	8.9578e+08	9.47602e+08
indexed		1995 = 1
									1970	1971	1972	1973	1974	1975	1976	1977	1978	1979	1980	1981	1982	1983	1984	1985	1986	1987	1988	1989	1990	1991	1992	1993	1994	1995	1996	1997	1998	1999	2000	2001	2002	2003	2004	2005	2006	2007	2008	2009	2010
No.		Name	Sym.	cas no.	group	initial emission or extraction	unit	Name
89	*	Actinium	Ac	7440-34-8	element	resources	kg	Actinium																										#DIV/0!	#DIV/0!	#DIV/0!	#DIV/0!	#DIV/0!	#DIV/0!	#DIV/0!	#DIV/0!	#DIV/0!	#DIV/0!	#DIV/0!	#DIV/0!	#DIV/0!	#DIV/0!	#DIV/0!	#DIV/0!
13		Aluminium	Al	7429-90-5	element	resources	kg	Aluminium																										1	0.979657	1.01031	4.27355	4.98073	4.93471	4.69474	4.80531	4.85883	5.1774	5.55992	5.88821	6.0296	5.98255	5.34078	5.19926
95	*	Americium	Am					Americium																										#DIV/0!	#DIV/0!	#DIV/0!	#DIV/0!	#DIV/0!	#DIV/0!	#DIV/0!	#DIV/0!	#DIV/0!	#DIV/0!	#DIV/0!	#DIV/0!	#DIV/0!	#DIV/0!	#DIV/0!	#DIV/0!
51		Antimony	Sb	7440-36-0	element	resources	kg	Antimony																										1	1.51456	1.50485	1.13592	1.04854	1.14563	1.52427	1.14563	1.12621	1.37864	1.6699	1.67961	1.74757	1.79612	1.53398	1.76699
18		Argon	Ar	7440-37-1	element	resources	kg	Argon																										#DIV/0!	#DIV/0!	#DIV/0!	#DIV/0!	#DIV/0!	#DIV/0!	#DIV/0!	#DIV/0!	#DIV/0!	#DIV/0!	#DIV/0!	#DIV/0!	#DIV/0!	#DIV/0!	#DIV/0!	#DIV/0!
33		Arsenic	As	7440-38-2	element	resources	kg	Arsenic																										1	0.912921	0.893258	0.856742	0.88764	1.33427	1.26404	1.32584	1.48315	1.23034	1.27528	1.29494	1.14607	1.0927	1.02809	0.882022
85	*	Astatine	At					Astatine																										#DIV/0!	#DIV/0!	#DIV/0!	#DIV/0!	#DIV/0!	#DIV/0!	#DIV/0!	#DIV/0!	#DIV/0!	#DIV/0!	#DIV/0!	#DIV/0!	#DIV/0!	#DIV/0!	#DIV/0!	#DIV/0!
56		Barium	Ba	7440-39-3	element	resources	kg	Barium																										1	1.25466	1.38509	1.19048	1.27536	1.35818	1.39545	1.27536	1.40373	1.58799	1.6294	1.63768	1.64803	1.80538	1.45963	1.41201
97	*	Berkelium	Bk					Berkelium																										#DIV/0!	#DIV/0!	#DIV/0!	#DIV/0!	#DIV/0!	#DIV/0!	#DIV/0!	#DIV/0!	#DIV/0!	#DIV/0!	#DIV/0!	#DIV/0!	#DIV/0!	#DIV/0!	#DIV/0!	#DIV/0!
4		Beryllium	Be	7440-41-7	element	resources	kg	Beryllium																										1	1	1	1	1	1	1	1	1	1	1	1	1	1	1	1
83		Bismuth	Bi	7440-69-9	element	resources	kg	Bismuth																										1	1.04956	1.30904	1.16327	1.60058	1.09621	1.28863	1.34111	1.48688	1.63265	1.57434	1.69096	1.86589	2.18659	2.18659	2.2449
107	*	Bohrium	Bh					Bohrium																										#DIV/0!	#DIV/0!	#DIV/0!	#DIV/0!	#DIV/0!	#DIV/0!	#DIV/0!	#DIV/0!	#DIV/0!	#DIV/0!	#DIV/0!	#DIV/0!	#DIV/0!	#DIV/0!	#DIV/0!	#DIV/0!
5		Boron	B	7440-42-8	element	resources	kg	Boron																										1	1.07711	1.1393	1.13682	1.10945	1.14428	1.1791	1.1393	1.18159	1.23383	1.23134	0.900498	1.04478	1.11443	0.895522	1.02488
35		Bromine	Br	7726-95-6	element	resources	kg	Bromine																										1	1.06824	1.2223	1.16404	1.15374	1.20769	1.08564	1.12188	1.07215	1.27559	1.44989	1.48518	1.43565	1.46918	1.31697	1.44506
48		Cadmium	Cd	7440-43-9	element	resources	kg	Cadmium																										1	0.940299	1.00995	1.00498	0.995025	1.00995	0.995025	0.885572	0.915423	0.925373	1	0.99005	0.930348	1.07463	1.03483	1.1791
20		Calcium	Ca	7440-70-2	element	resources	kg	Calcium																										1	1.02025	1.01001	0.999501	1.00545	1.03655	1.03257	1.66081	1.76353	1.92567	2.05231	2.17912	2.30768	2.31852	2.39708	2.52185
98	*	Californium	Cf					Californium																										#DIV/0!	#DIV/0!	#DIV/0!	#DIV/0!	#DIV/0!	#DIV/0!	#DIV/0!	#DIV/0!	#DIV/0!	#DIV/0!	#DIV/0!	#DIV/0!	#DIV/0!	#DIV/0!	#DIV/0!	#DIV/0!
6		Carbon	C					Carbon																										1	0.950342	1.17295	1.11473	1.18493	1.44863	1.39726	1.59589	1.71062	1.72945	1.7637	1.74658	1.91781	1.79795	1.2774	1.78082
58		Cerium	Ce	7440-45-1	element	resources	kg	Cerium																										1	1	1	1	1	1	1	1	1	1	1	1	1	1	1	1
55		Cesium	Cs	7440-46-2	element	resources	kg	Cesium																										1	1.07268	0.919246	1.03769	1.16555	1.22342	1.27187	1.32167	1.30686	1.37281	1.64199	1.84388	1.66891	1.77658	1.81696	1.35935
17		Chlorine	Cl	7782-50-5	element	resources	kg	Chlorine																										1	1.02513	1.11055	1.00503	1.05528	0.979899	1	1.07538	1.13065	1.1809	1.25126	1.31156	1.31156	1.31156	1.33166	1.35176
24		Chromium	Cr	7440-47-3	element	resources	kg	Chromium																										1	0.807947	0.95585	0.984547	1.06181	1.04857	0.825607	0.995585	1.05298	1.10596	1.30684	1.34216	1.5298	1.61589	1.32671	1.65784
27		Cobalt	Co	7440-48-4	element	resources	kg	Cobalt																										1	1.06939	1.11837	1.48163	1.38367	1.60408	1.8898	2.19184	2.22857	2.46122	2.66122	2.85714	3.00816	3.26122	3.31429	4.4898
29		Copper	Cu	7440-50-8	element	resources	kg	Copper																										1	1.1	1.15	1.21	1.28	1.32	1.37	1.36	1.38	1.47	1.5	1.51	1.55	1.56	1.61	1.61
96	*	Curium	Cm					Curium																										#DIV/0!	#DIV/0!	#DIV/0!	#DIV/0!	#DIV/0!	#DIV/0!	#DIV/0!	#DIV/0!	#DIV/0!	#DIV/0!	#DIV/0!	#DIV/0!	#DIV/0!	#DIV/0!	#DIV/0!	#DIV/0!
105	*	Dubnium	Db					Dubnium																										#DIV/0!	#DIV/0!	#DIV/0!	#DIV/0!	#DIV/0!	#DIV/0!	#DIV/0!	#DIV/0!	#DIV/0!	#DIV/0!	#DIV/0!	#DIV/0!	#DIV/0!	#DIV/0!	#DIV/0!	#DIV/0!
66		Dysprosium	Dy	7429-91-6	element	resources	kg	Dysprosium																										1	1.07268	0.919246	1.03769	1.16555	1.22342	1.27187	1.32167	1.30686	1.37281	1.64199	1.84388	1.66891	1.77658	1.81696	1.35935
99	*	Einsteinium	Es					Einsteinium																										#DIV/0!	#DIV/0!	#DIV/0!	#DIV/0!	#DIV/0!	#DIV/0!	#DIV/0!	#DIV/0!	#DIV/0!	#DIV/0!	#DIV/0!	#DIV/0!	#DIV/0!	#DIV/0!	#DIV/0!	#DIV/0!
68		Erbium	Er	7440-52-0	element	resources	kg	Erbium																										1	1.07268	0.919246	1.03769	1.16555	1.22342	1.27187	1.32167	1.30686	1.37281	1.64199	1.84388	1.66891	1.77658	1.81696	1.35935
63		Europium	Eu	7440-53-1	element	resources	kg	Europium																										1	1.07268	0.919246	1.03769	1.16555	1.22342	1.27187	1.32167	1.30686	1.37281	1.64199	1.84388	1.66891	1.77658	1.81696	1.35935
100	*	Fermium	Fm					Fermium																										#DIV/0!	#DIV/0!	#DIV/0!	#DIV/0!	#DIV/0!	#DIV/0!	#DIV/0!	#DIV/0!	#DIV/0!	#DIV/0!	#DIV/0!	#DIV/0!	#DIV/0!	#DIV/0!	#DIV/0!	#DIV/0!
9		Fluorine	F	7782-41-4	element	resources	kg	Fluorine																										1	1.03376	1.0342	1.09414	1.06217	1.10134	1.13673	1.09828	1.19681	1.28992	1.32259	1.39709	1.4125	1.70721	1.55002	1.72554
87	*	Francium	Fr					Francium																										#DIV/0!	#DIV/0!	#DIV/0!	#DIV/0!	#DIV/0!	#DIV/0!	#DIV/0!	#DIV/0!	#DIV/0!	#DIV/0!	#DIV/0!	#DIV/0!	#DIV/0!	#DIV/0!	#DIV/0!	#DIV/0!
64		Gadolinium	Gd	7440-54-2	element	resources	kg	Gadolinium																										1	1.07268	0.919246	1.03769	1.16555	1.22342	1.27187	1.32167	1.30686	1.37281	1.64199	1.84388	1.66891	1.77658	1.81696	1.35935
31		Gallium	Ga	7440-55-3	element	resources	kg	Gallium																										1	0.878049	1.21138	1.51707	1.21951	1.46341	1.31707	0.99187	1.13821	0.97561	1.12195	1.18699	1.54472	1.80488	1.28455	2.95935
32		Germanium	Ge	7440-56-4	element	resources	kg	Germanium																										1	1.17778	1.4	1.24444	1.28889	1.55556	1.55556	1.11111	0.977778	1.93333	2	2	2.22222	3.11111	2.66667	2.62222
79		Gold	Au	7440-57-5	element	resources	kg	Gold																										1	1.02691	1.09865	1.12108	1.15247	1.16143	1.16592	1.1435	1.13901	1.0852	1.10762	1.06278	1.05381	1.03139	1.11659	1.16143
72		Hafnium	Hf	7440-58-6	element	resources	kg	Hafnium																										1	1	1	1	1	1	1	1	1	1	1	1	1	1	1	1
108	*	Hassium	Hs					Hassium																										#DIV/0!	#DIV/0!	#DIV/0!	#DIV/0!	#DIV/0!	#DIV/0!	#DIV/0!	#DIV/0!	#DIV/0!	#DIV/0!	#DIV/0!	#DIV/0!	#DIV/0!	#DIV/0!	#DIV/0!	#DIV/0!
2		Helium	He	7440-59-7	element	resources	kg	Helium																										#DIV/0!	#DIV/0!	#DIV/0!	#DIV/0!	#DIV/0!	#DIV/0!	#DIV/0!	#DIV/0!	#DIV/0!	#DIV/0!	#DIV/0!	#DIV/0!	#DIV/0!	#DIV/0!	#DIV/0!	#DIV/0!
67		Holmium	Ho	7440-60-0	element	resources	kg	Holmium																										1	1.07268	0.919246	1.03769	1.16555	1.22342	1.27187	1.32167	1.30686	1.37281	1.64199	1.84388	1.66891	1.77658	1.81696	1.35935
1		Hydrogen	H					Hydrogen																										1	1.02786	1.04766	1.04011	1.0794	1.08312	1.06935	1.22008	1.27365	1.50769	1.54709	1.64932	1.7188	1.66031	2.08253	2.17745
49		Indium	In	7440-74-6	element	resources	kg	Indium																										1	0.83682	0.962343	0.962343	0.899582	1.40167	1.70711	1.69874	1.59414	1.64017	2.53975	2.66946	2.64017	2.83682	2.80335	2.77824
53		Iodine	I	7553-56-2	element	resources	kg	Iodine																										1	1.05224	1.17164	1.38806	1.37313	1.45522	1.54478	1.56716	1.83582	1.85075	1.97761	1.99254	1.96269	1.9403	1.97761	1.9403
77		Iridium	Ir	7439-88-5	element	resources	kg	Iridium																										1	1	1	1	1	1	1	1	1	1	1	1	1	1	1	1
26		Iron	Fe	7439-89-6	element	resources	kg	Iron																										1	0.998013	1.01766	1.17317	1.17508	1.12326	1.08133	1.12745	1.22203	1.34879	1.47908	1.63558	1.8398	1.88365	1.83911	1.98112
36		Krypton	Kr	7439-90-9	element	resources	kg	Krypton																										#DIV/0!	#DIV/0!	#DIV/0!	#DIV/0!	#DIV/0!	#DIV/0!	#DIV/0!	#DIV/0!	#DIV/0!	#DIV/0!	#DIV/0!	#DIV/0!	#DIV/0!	#DIV/0!	#DIV/0!	#DIV/0!
57		Lanthanum	La	7439-91-0	element	resources	kg	Lanthanum																										1	1.07268	0.919246	1.03769	1.16555	1.22342	1.27187	1.32167	1.30686	1.37281	1.64199	1.84388	1.66891	1.77658	1.81696	1.35935
103	*	Lawrencium	Lr					Lawrencium																										#DIV/0!	#DIV/0!	#DIV/0!	#DIV/0!	#DIV/0!	#DIV/0!	#DIV/0!	#DIV/0!	#DIV/0!	#DIV/0!	#DIV/0!	#DIV/0!	#DIV/0!	#DIV/0!	#DIV/0!	#DIV/0!
82		Lead	Pb	7439-92-1	element	resources	kg	Lead																										1	1.07749	1.14391	1.12915	1.13653	1.18081	1.15129	1.05166	1.18081	1.16236	1.28044	1.33948	1.369	1.43173	1.39483	1.53506
3		Lithium	Li	7439-93-2	element	resources	kg	Lithium																										1	1.20904	1.20339	1.00565	1.06215	1.15254	1.18644	1.22599	1.44633	1.47458	1.9322	2.21469	2.13559	2.53672	2.0678	2.71751
71		Lutetium	Lu	7439-94-3	element	resources	kg	Lutetium																										1	1.07268	0.919246	1.03769	1.16555	1.22342	1.27187	1.32167	1.30686	1.37281	1.64199	1.84388	1.66891	1.77658	1.81696	1.35935
12		Magnesium	Mg	7439-95-4	element	resources	kg	Magnesium																										1	0.981116	0.978752	4.57082	5.27708	5.28417	4.972	5.11066	5.12546	5.47633	5.82092	6.09272	6.31517	6.22227	5.5024	5.3209
25		Manganese	Mn	7439-96-5	element	resources	kg	Manganese																										1	1.02643	0.943641	0.919796	0.801866	0.873371	0.951168	0.978775	1.10298	1.24224	1.38024	1.44296	1.5057	1.68171	1.41824	1.84491
109	*	Meitnerium	Mt					Meitnerium																										#DIV/0!	#DIV/0!	#DIV/0!	#DIV/0!	#DIV/0!	#DIV/0!	#DIV/0!	#DIV/0!	#DIV/0!	#DIV/0!	#DIV/0!	#DIV/0!	#DIV/0!	#DIV/0!	#DIV/0!	#DIV/0!
101	*	Mendelevium	Md					Mendelevium																										#DIV/0!	#DIV/0!	#DIV/0!	#DIV/0!	#DIV/0!	#DIV/0!	#DIV/0!	#DIV/0!	#DIV/0!	#DIV/0!	#DIV/0!	#DIV/0!	#DIV/0!	#DIV/0!	#DIV/0!	#DIV/0!
80		Mercury	Hg	7439-97-6	element	resources	kg	Mercury																										1	0.802508	0.755486	0.495298	0.413793	0.426332	0.470219	0.467085	0.54232	0.595611	0.476489	0.360502	0.376176	0.570533	0.589342	0.683386
42		Molybdenum	Mo	7439-98-7	element	resources	kg	Molybdenum																										1	0.933824	1.01471	0.992647	0.948529	0.992647	0.970588	0.897059	0.963235	1.16912	1.36765	1.36765	1.55882	1.625	1.625	1.80882
60		Neodymium	Nd	7440-00-8	element	resources	kg	Neodymium																										1	1.07268	0.919246	1.03769	1.16555	1.22342	1.27187	1.32167	1.30686	1.37281	1.64199	1.84388	1.66891	1.77658	1.81696	1.35935
10		Neon	Ne	7440-01-9	element	resources	kg	Neon																										#DIV/0!	#DIV/0!	#DIV/0!	#DIV/0!	#DIV/0!	#DIV/0!	#DIV/0!	#DIV/0!	#DIV/0!	#DIV/0!	#DIV/0!	#DIV/0!	#DIV/0!	#DIV/0!	#DIV/0!	#DIV/0!
93	*	Neptunium	Np					Neptunium																										#DIV/0!	#DIV/0!	#DIV/0!	#DIV/0!	#DIV/0!	#DIV/0!	#DIV/0!	#DIV/0!	#DIV/0!	#DIV/0!	#DIV/0!	#DIV/0!	#DIV/0!	#DIV/0!	#DIV/0!	#DIV/0!
28		Nickel	Ni	7440-02-0	element	resources	kg	Nickel																										1	1.01923	1.09615	1.13462	1.125	1.24038	1.29808	1.29808	1.31731	1.29808	1.40385	1.50962	1.67308	1.56731	1.35577	1.64423
41		Niobium	Nb	7440-03-1	element	resources	kg	Niobium																										1	1.03846	1.3141	1.67949	1.57692	1.58974	1.99359	2.13462	2.58974	1.76923	2.76282	3.38462	3.98718	6.79487	4.30128	3.14744
7		Nitrogen	N	7727-37-9	element	resources	kg	Nitrogen																										1	1.05	1.03	1.04	1.07	1.08	1.05	1.09	1.1	1.17	1.22	1.25	1.31	1.28	1.28	1.32
102	*	Nobelium	No					Nobelium																										#DIV/0!	#DIV/0!	#DIV/0!	#DIV/0!	#DIV/0!	#DIV/0!	#DIV/0!	#DIV/0!	#DIV/0!	#DIV/0!	#DIV/0!	#DIV/0!	#DIV/0!	#DIV/0!	#DIV/0!	#DIV/0!
76		Osmium	Os	7440-04-2	element	resources	kg	Osmium																										1	1	1	1	1	1	1	1	1	1	1	1	1	1	1	1
8		Oxygen	O	7782-44-7	element	resources	kg	Oxygen																										1	0.975824	0.998008	3.96113	4.59271	4.54332	4.30838	4.5013	4.53697	4.86829	5.21018	5.50703	5.61421	5.52806	5.10224	4.93998
46		Palladium	Pd	7440-05-3	element	resources	kg	Palladium																										1	0.799312	0.992168	1.14534	1.10751	1.09172	1.02622	0.757137	0.916397	1.20613	1.22842	1.14559	1.23385	1.06177	1.04128	1.07595
15		Phosphorus	P	7723-14-0	element	resources	kg	Phosphorus																										1	1.03849	1.10003	1.10772	1.05387	1.01541	0.969262	1.04618	1.06157	1.09234	1.16926	1.16156	1.23079	1.27707	1.24629	1.40786
78		Platinum	Pt	7440-06-4	element	resources	kg	Platinum																										1	1.67067	1.191	1.3036	1.18079	1.2873	1.44788	1.44708	1.57633	1.59476	1.74376	1.73742	1.73657	1.56069	1.50051	1.57684
94	*	Plutonium	Pu					Plutonium																										#DIV/0!	#DIV/0!	#DIV/0!	#DIV/0!	#DIV/0!	#DIV/0!	#DIV/0!	#DIV/0!	#DIV/0!	#DIV/0!	#DIV/0!	#DIV/0!	#DIV/0!	#DIV/0!	#DIV/0!	#DIV/0!
84	*	Polonium	Po	7440-08-6	element	resources	kg	Polonium																										#DIV/0!	#DIV/0!	#DIV/0!	#DIV/0!	#DIV/0!	#DIV/0!	#DIV/0!	#DIV/0!	#DIV/0!	#DIV/0!	#DIV/0!	#DIV/0!	#DIV/0!	#DIV/0!	#DIV/0!	#DIV/0!
19		Potassium	K	7440-09-7	element	resources	kg	Potassium																										1	0.95375	1.00792	2.79443	3.20439	3.1635	3.01369	3.07372	3.12297	3.36998	3.60561	3.65957	3.82622	3.74603	3.04323	3.30107
59		Praseodymium	Pr	7440-10-0	element	resources	kg	Praseodymium																										1	1.07268	0.919246	1.03769	1.16555	1.22342	1.27187	1.32167	1.30686	1.37281	1.64199	1.84388	1.66891	1.77658	1.81696	1.35935
61	*	Promethium	Pm	???	element	resources	kg	Promethium																										#DIV/0!	#DIV/0!	#DIV/0!	#DIV/0!	#DIV/0!	#DIV/0!	#DIV/0!	#DIV/0!	#DIV/0!	#DIV/0!	#DIV/0!	#DIV/0!	#DIV/0!	#DIV/0!	#DIV/0!	#DIV/0!
91		Protactinium	Pa					Protactinium																										#DIV/0!	#DIV/0!	#DIV/0!	#DIV/0!	#DIV/0!	#DIV/0!	#DIV/0!	#DIV/0!	#DIV/0!	#DIV/0!	#DIV/0!	#DIV/0!	#DIV/0!	#DIV/0!	#DIV/0!	#DIV/0!
88	*	Radium	Ra	7440-14-4	element	resources	kg	Radium																										#DIV/0!	#DIV/0!	#DIV/0!	#DIV/0!	#DIV/0!	#DIV/0!	#DIV/0!	#DIV/0!	#DIV/0!	#DIV/0!	#DIV/0!	#DIV/0!	#DIV/0!	#DIV/0!	#DIV/0!	#DIV/0!
86	*	Radon	Rn	10043-92-2	element	resources	kg	Radon																										#DIV/0!	#DIV/0!	#DIV/0!	#DIV/0!	#DIV/0!	#DIV/0!	#DIV/0!	#DIV/0!	#DIV/0!	#DIV/0!	#DIV/0!	#DIV/0!	#DIV/0!	#DIV/0!	#DIV/0!	#DIV/0!
75		Rhenium	Re	7440-15-5	element	resources	kg	Rhenium																										1	0.804965	1.26241	1.1773	1.25177	1.2766	1.17376	1.12057	1.35816	1.52128	1.6773	1.65603	1.58865	1.88298	1.51418	1.47518
45		Rhodium	Rh	7440-16-6	element	resources	kg	Rhodium																										1	1	1	1	1	1	1	1	1	1	1	1	1	1	1	1
37		Rubidium	Rb	7440-17-7	element	resources	kg	Rubidium																										#DIV/0!	#DIV/0!	#DIV/0!	#DIV/0!	#DIV/0!	#DIV/0!	#DIV/0!	#DIV/0!	#DIV/0!	#DIV/0!	#DIV/0!	#DIV/0!	#DIV/0!	#DIV/0!	#DIV/0!	#DIV/0!
44		Ruthenium	Ru	7440-18-8	element	resources	kg	Ruthenium																										1	1	1	1	1	1	1	1	1	1	1	1	1	1	1	1
104	*	Rutherfordium	Rf					Rutherfordium																										#DIV/0!	#DIV/0!	#DIV/0!	#DIV/0!	#DIV/0!	#DIV/0!	#DIV/0!	#DIV/0!	#DIV/0!	#DIV/0!	#DIV/0!	#DIV/0!	#DIV/0!	#DIV/0!	#DIV/0!	#DIV/0!
62		Samarium	Sm	7440-19-9	element	resources	kg	Samarium																										1	1.07268	0.919246	1.03769	1.16555	1.22342	1.27187	1.32167	1.30686	1.37281	1.64199	1.84388	1.66891	1.77658	1.81696	1.35935
21		Scandium	Sc	7440-20-2	element	resources	kg	Scandium																										1	1	1	1	1	1	1	1	1	1	1	1	1	1	1	1
106	*	Seaborgium	Sg					Seaborgium																										#DIV/0!	#DIV/0!	#DIV/0!	#DIV/0!	#DIV/0!	#DIV/0!	#DIV/0!	#DIV/0!	#DIV/0!	#DIV/0!	#DIV/0!	#DIV/0!	#DIV/0!	#DIV/0!	#DIV/0!	#DIV/0!
34		Selenium	Se	7782-49-2	element	resources	kg	Selenium																										1	1.08696	0.830918	0.710145	0.681159	0.705314	0.710145	0.714976	0.758454	0.695652	0.975845	1.00966	1.08213	1.09179	1.04348	1.03865
14		Silicon	Si	7440-21-3	element	resources	kg	Silicon																										1	1.0418	1.0828	1.08698	1.13489	1.17307	1.19595	1.25184	1.32228	1.4272	1.5298	1.64651	1.82692	1.88364	1.73585	1.9602
47		Silver	Ag	7440-22-4	element	resources	kg	Silver																										1	1.01342	1.10738	1.15436	1.18121	1.21477	1.25503	1.26174	1.26174	1.34228	1.39597	1.34899	1.39597	1.42953	1.49664	1.56376
11		Sodium	Na	7440-23-5	element	resources	kg	Sodium																										1	1.02513	1.10592	1.01144	1.06053	0.996317	1.01728	1.08968	1.14205	1.19471	1.26471	1.32831	1.34105	1.34602	1.35243	1.38787
38		Strontium	Sr	7440-24-6	element	resources	kg	Strontium																										1	0.983923	0.848875	0.848875	1.15113	1.27331	1.28296	1.42765	1.58199	1.6881	1.63666	1.68489	1.66559	1.25402	1.1865	1.04502
16		Sulfur	S	7704-34-9	element	resources	kg	Sulfur																										1	1.02168	1.0534	1.05114	1.06476	1.08835	1.08389	1.13107	1.16766	1.27695	1.31029	1.32265	1.35079	1.33002	1.51797	1.55991
73		Tantalum	Ta	7440-25-7	element	resources	kg	Tantalum																										1	1.20776	1.55679	2.15789	1.81717	2.96399	3.2687	3.71191	3.85042	3.96122	3.82271	2.3795	2.93629	4.15512	2.6482	2.55402
43	*	Technetium	Tc					Technetium																										#DIV/0!	#DIV/0!	#DIV/0!	#DIV/0!	#DIV/0!	#DIV/0!	#DIV/0!	#DIV/0!	#DIV/0!	#DIV/0!	#DIV/0!	#DIV/0!	#DIV/0!	#DIV/0!	#DIV/0!	#DIV/0!
52		Tellurium	Te	13494-80-9	element	resources	kg	Tellurium																										1	0.697143	0.622857	0.702857	0.662857	0.628571	0.622857	0.508571	0.542857	0.542857	0.542857	0.542857	0.542857	0.542857	0.542857	0.542857
65		Terbium	Tb	7440-27-9	element	resources	kg	Terbium																										1	1.07268	0.919246	1.03769	1.16555	1.22342	1.27187	1.32167	1.30686	1.37281	1.64199	1.84388	1.66891	1.77658	1.81696	1.35935
81		Thallium	Tl	7440-28-0	element	resources	kg	Thallium																										1	1	1	1	1	1	1	1	0.8	0.666667	0.666667	0.666667	0.666667	0.666667	0.666667	0.666667
90		Thorium	Th	7440-29-1	element	resources	kg	Thorium																										#DIV/0!	#DIV/0!	#DIV/0!	#DIV/0!	#DIV/0!	#DIV/0!	#DIV/0!	#DIV/0!	#DIV/0!	#DIV/0!	#DIV/0!	#DIV/0!	#DIV/0!	#DIV/0!	#DIV/0!	#DIV/0!
69		Thulium	Tm	7440-30-4	element	resources	kg	Thulium																										1	1.07268	0.919246	1.03769	1.16555	1.22342	1.27187	1.32167	1.30686	1.37281	1.64199	1.84388	1.66891	1.77658	1.81696	1.35935
50		Tin	Sn	7440-31-5	element	resources	kg	Tin																										1	1.09453	1.199	1.14925	1.21891	1.38308	1.22388	1.1592	1.28358	1.48259	1.47264	1.45771	1.49751	1.28358	1.1791	1.32338
22		Titanium	Ti	7440-32-6	element	resources	kg	Titanium																										1	1.02127	1.11095	1.2125	1.16227	1.16488	1.2062	1.18212	1.17014	1.2377	1.19118	1.36484	1.42342	1.38651	1.25566	1.34068
74		Tungsten	W	7440-33-7	element	resources	kg	Tungsten																										1	0.901299	0.862338	0.961039	0.979221	1.14286	1.31948	1.22078	1.22597	1.72208	1.54545	1.47013	1.39221	1.60779	1.58961	1.77662
92		Uranium	U	7440-61-1	element	resources	kg	Uranium																										1	1.06229	1.08512	1.02338	0.941016	1.05855	1.1051	1.13568	1.10868	1.23888	1.28806	1.209	1.26768	1.34379	1.54955	1.63761
23		Vanadium	V	7440-62-2	element	resources	kg	Vanadium																										1	0.975	1.03056	1.18611	1.00833	1.13889	1.16111	1.41667	1.33056	1.44167	1.56667	1.60833	1.625	1.71111	1.63333	1.99167
54		Xenon	Xe	7440-63-3	element	resources	kg	Xenon																										#DIV/0!	#DIV/0!	#DIV/0!	#DIV/0!	#DIV/0!	#DIV/0!	#DIV/0!	#DIV/0!	#DIV/0!	#DIV/0!	#DIV/0!	#DIV/0!	#DIV/0!	#DIV/0!	#DIV/0!	#DIV/0!
70		Ytterbium	Yb	7440-64-4	element	resources	kg	Ytterbium																										1	1.07268	0.919246	1.03769	1.16555	1.22342	1.27187	1.32167	1.30686	1.37281	1.64199	1.84388	1.66891	1.77658	1.81696	1.35935
39		Yttrium	Y	7440-65-5	element	resources	kg	Yttrium																										1	1.07268	0.919246	1.03769	1.16555	1.22342	1.27187	1.32167	1.30686	1.37281	1.64199	1.84388	1.66891	1.77658	1.81696	1.35935
30		Zinc	Zn	7440-66-6	element	resources	kg	Zinc																										1	1.02747	1.03571	1.03984	1.09341	1.20467	1.2239	1.21978	1.30769	1.31868	1.37363	1.41484	1.52473	1.63462	1.59341	1.68956
40		Zirconium	Zr	7440-67-7	element	resources	kg	Zirconium																										1	0.973856	0.904139	0.797386	0.733115	0.796296	0.816993	1.05991	1.1329	1.16558	1.15468	1.35076	1.54684	1.47059	1.31808	1.39434
[truncated: 15 more columns]

[truncated: 19 more sheets: a&g (P and R), a&g (ADPs), a&g (norm. data, year y), a&g (norm. data, year 1999), a&g (norm. data, year 2015), a&g (var ADP), references, APPENDICES, Ecoinvent names, JRC names, elements formula and weights, Rare earth elements production, nitrogen flows, ADP, P, R for analysis, contribution to category total, table 3, table 3 sorted, Figure 8, comp ADP & CT old&new]
