# Supplementary material for: Abiotic resource depletion potentials (ADPs) for elements revisited—updating ultimate reserve estimates and introducing time series for production data
Source: Springer Nature journal article supplement (doi:10.1007/s11367-019-01683-x), 2019-10-16
Supplement: MOESM2 [file 17280868]

**Abiotic resource depletion potentials (ADPs) for elements revisited**

Lauran van Oers1*,Jeroen B. Guinée1 and Reinout Heijungs1,2

1 Institute of Environmental Sciences (CML), Department of Industrial Ecology, Leiden University. Einsteinweg 2, 2333 CC Leiden, The Netherlands

2 Department of Econometrics and Operations Research, Vrije Universiteit Amsterdam, De Boelelaan 1105, 1081HV Amsterdam, The Netherlands

* Corresponding author. E-mail: oers@cml.leidenuniv.nl

**ESM2: Treating the variability of the production data as an uncertainty**

As an exercise, we addressed the variability of the production data as an uncertainty, and then applied the Gaussian theory of error propagation. The idea is that the variance of calculated results can be expressed, as an approximation, in terms of the variance of the contributing variables. For the category total, we have

(1)

which then yields

(2)

For the variance of the reserve, , we use zero (for now); for the variance of the production, we use the estimate from the time series:

(3)

The partial derivative is easy:

(4)

Therefore, we use

(5)

This can be interpreted as follows: the variance of the category total is built up from the variance of the underlying production values. Because the contributions are additive and non-negative, we can easily see which element is responsible for the variation/uncertainty in the category total. If we do this, we find that *the variability of Gold production completely dominates the variability of the category total*. It is responsible for a share between 94 and 98%. Copper, Platinum and Palladium are the only elements for which the variance contributes more than 1% in one or more years.[[1]](#footnote-1) (see ESM1 tabsheet a&g (var ADP))

For the production data, we have a time series, which we use to estimate the variance (). Another possible contributing part is the uncertainty in the reserve, . We have no time series for it[[2]](#footnote-2), and no other clue, but we can of course set it to a value, to see what happens, e.g. use a relative standard deviation of 10%:

(6)

with . The full formula for the variance of the category total then needs the partial derivative with respect to the reserve as well:

(7)

which then gives

(8)

This has hardly any effect on the ranking of contributors, even if we change the CV of the reserves to 100%. Apparently, it is production data, and then in particular production of Gold, that is excessively responsible for the variability of the *category totals*, reserve data are less important[[3]](#footnote-3).

1. Please remind that the only aim of normalization is to put category indicator results in the same units, for which category indicator results are divided by their corresponding category totals resulting in the dimension yr-1. However, normalized indicator results do not tell anything about the seriousness of the problem. For that a weighting is needed, which is an additional step. For some weighting methods, like panel weighting, normalization is a necessary step. When there is prove or when society’s opinion is that resources are not going to be depleted for a very long time span, the weighting factor for depletion could be set low. This is a subjective and political choice. An ADP only expresses the relative contribution of a substance to a pre-defined problem. [↑](#footnote-ref-1)
2. Please note that the stock we are talking about in this paper is the ultimate reserve (i.e. crustal content) and does not refer to reserve (or reserve base) estimates as made by USGS. The estimates of reserve or reserve base (as reported by USGS) will depend on technical and economic conditions and will change over time, due to technical economic circumstances or different measuring techniques and errors. However, for the ultimate reserve data we do not have uncertainty data. In the case that stock data are based on the reserve (or reserve base) estimates, it is possible to use time series as reported by USGS to analyze the contribution of the reserve parameter in the ADP and the category total. However, such data were not gathered in the project because it was beyond the scope of an update of the ADP based on ultimate reserves. [↑](#footnote-ref-2)
3. Note that this does not imply that changes in the ADP of a particular element due to changes in its -value could still have relatively huge consequences for particular case studies. [↑](#footnote-ref-3)
