# Supplementary material for: Abiotic resource depletion potentials (ADPs) for elements revisited—updating ultimate reserve estimates and introducing time series for production data
Source: Springer Nature journal article supplement (doi:10.1007/s11367-019-01683-x), 2019-10-16
Supplement: MOESM3 [file 17280868]

## Sheet: Results uit CMLCA
&Reference = None											&Reference = None
Label	Name	[A1] Output of [G5796] copper_copper production, primary[RER]	[A2] Output of [G6627] steel, low-alloyed_steel production, converter, low-alloyed[RER]	[A3] Output of [G6049] electricity, high voltage_electricity, high voltage, production mix[NL]	Unit						Label	Name	[A1] Output of [G5796] copper_copper production, primary[RER]	[A2] Output of [G6627] steel, low-alloyed_steel production, converter, low-alloyed[RER]	[A3] Output of [G6049] electricity, high voltage_electricity, high voltage, production mix[NL]	Unit
[C339]	('ILCD 1.0.8 2016 midpoint', 'climate change', 'GWP 100a')	1.83	2.41	0.605	kg CO2-Eq						[C339]	('ILCD 1.0.8 2016 midpoint', 'climate change', 'GWP 100a')	4.26e-14	5.61e-14	1.41e-14	year
[C349]	('ILCD 1.0.8 2016 midpoint', 'human health', 'ozone layer depletion')	1.63e-07	1.2e-07	3.14e-08	kg CFC-11-Eq						[C349]	('ILCD 1.0.8 2016 midpoint', 'human health', 'ozone layer depletion')	1.36e-15	9.98e-16	2.62e-16	year
[C346]	('ILCD 1.0.8 2016 midpoint', 'human health', 'carcinogenic effects')	1.54e-06	1.45e-06	1e-08	CTUh						[C346]	('ILCD 1.0.8 2016 midpoint', 'human health', 'carcinogenic effects')	3.81e-12	3.58e-12	2.49e-14	year
[C348]	('ILCD 1.0.8 2016 midpoint', 'human health', 'non-carcinogenic effects')	4.09e-05	3.15e-06	4.4e-08	CTUh						[C348]	('ILCD 1.0.8 2016 midpoint', 'human health', 'non-carcinogenic effects')	1.38e-12	1.06e-13	1.48e-15	year
[C340]	('ILCD 1.0.8 2016 midpoint', 'ecosystem quality', 'freshwater and terrestrial acidification')	0.0744	0.0133	0.00087	mol H+-Eq						[C340]	('ILCD 1.0.8 2016 midpoint', 'ecosystem quality', 'freshwater and terrestrial acidification')	2.46e-13	4.41e-14	2.87e-15	year
[C351]	('ILCD 1.0.8 2016 midpoint', 'human health', 'respiratory effects, inorganics')	0.00712	0.00275	4.31e-05	kg PM2.5-Eq						[C351]	('ILCD 1.0.8 2016 midpoint', 'human health', 'respiratory effects, inorganics')	1.81e-13	7e-14	1.1e-15	year
[C341]	('ILCD 1.0.8 2016 midpoint', 'ecosystem quality', 'freshwater ecotoxicity')	918	92.9	1.05	CTUh.m3.yr						[C341]	('ILCD 1.0.8 2016 midpoint', 'ecosystem quality', 'freshwater ecotoxicity')	3.08e-11	3.11e-12	3.51e-14	year
[C347]	('ILCD 1.0.8 2016 midpoint', 'human health', 'ionising radiation')	0.297	0.0903	0.0415	kg U235-Eq						[C347]	('ILCD 1.0.8 2016 midpoint', 'human health', 'ionising radiation')	3.48e-09	1.06e-09	4.88e-10	year
[C350]	('ILCD 1.0.8 2016 midpoint', 'human health', 'photochemical ozone creation')	0.0232	0.00979	0.000638	kg ethylene-Eq						[C350]	('ILCD 1.0.8 2016 midpoint', 'human health', 'photochemical ozone creation')	7.8e-14	3.29e-14	2.14e-15	year
[C345]	('ILCD 1.0.8 2016 midpoint', 'ecosystem quality', 'terrestrial eutrophication')	0.108	0.0264	0.00252	mol N-Eq						[C345]	('ILCD 1.0.8 2016 midpoint', 'ecosystem quality', 'terrestrial eutrophication')	1.54e-13	3.77e-14	3.6e-15	year
[C342]	('ILCD 1.0.8 2016 midpoint', 'ecosystem quality', 'freshwater eutrophication')	0.0229	0.0026	5.92e-05	kg P-Eq						[C342]	('ILCD 1.0.8 2016 midpoint', 'ecosystem quality', 'freshwater eutrophication')	1.53e-12	1.74e-13	3.95e-15	year
[C344]	('ILCD 1.0.8 2016 midpoint', 'ecosystem quality', 'marine eutrophication')	0.213	0.00241	0.000226	kg N-Eq						[C344]	('ILCD 1.0.8 2016 midpoint', 'ecosystem quality', 'marine eutrophication')	3e-12	3.39e-14	3.18e-15	year
[C352]	('ILCD 1.0.8 2016 midpoint', 'resources', 'land use')	21.4	4.9	0.599	kg Soil Organic Carbon						[C352]	('ILCD 1.0.8 2016 midpoint', 'resources', 'land use')	0	0	0	year
[C353]	('ILCD 1.0.8 2016 midpoint', 'resources', 'mineral, fossils and renewables')	0.00406	0.000164	1.13e-06	kg Sb-Eq						[C353]	('ILCD 1.0.8 2016 midpoint', 'resources', 'mineral, fossils and renewables')	1.33e-11	5.36e-13	3.68e-15	year
[C719]	ADPminerals, 1999	0.00164	3.69e-05	7.09e-08	kilogram antimony-Eq						[C719]	ADPminerals, 1999	8.78e-12	1.97e-13	3.79e-16	year
[C720]	ADPminerals, 2015	0.0295	0.000447	1.76e-06	kilogram antimony-Eq						[C720]	ADPminerals, 2015	6.75e-12	1.02e-13	4.03e-16	year
[C721]	ADPminerals, av 2011-2015 (5 yrs)	0.0248	0.000382	1.49e-06	kilogram antimony-Eq						[C721]	ADPminerals, av 2011-2015 (5 yrs)	6.89e-12	1.06e-13	4.14e-16	year
[C723]	ADPminerals, cum 1970-2015 (46 yrs)	0.023	0.000346	1.53e-06	kilogram antimony-Eq						[C723]	ADPminerals, cum 1970-2015 (46 yrs)	5.9e-12	8.86e-14	3.91e-16	year
[C728]	ADPfossils	25.2	31.8	10.8	megajoule						[C728]	ADPfossils	6.64e-14	8.36e-14	2.84e-14	year

## Sheet: Characterisation results
Label	Name	[A1] Output of [G5796] copper_copper production, primary[RER]	[A2] Output of [G6627] steel, low-alloyed_steel production, converter, low-alloyed[RER]	[A3] Output of [G6049] electricity, high voltage_electricity, high voltage, production mix[NL]	Unit
[C339]	('ILCD 1.0.8 2016 midpoint', 'climate change', 'GWP 100a')	1.83	2.41	0.605	kg CO2-Eq
[C349]	('ILCD 1.0.8 2016 midpoint', 'human health', 'ozone layer depletion')	1.63e-07	1.2e-07	3.14e-08	kg CFC-11-Eq
[C346]	('ILCD 1.0.8 2016 midpoint', 'human health', 'carcinogenic effects')	1.54e-06	1.45e-06	1e-08	CTUh
[C348]	('ILCD 1.0.8 2016 midpoint', 'human health', 'non-carcinogenic effects')	4.09e-05	3.15e-06	4.4e-08	CTUh
[C340]	('ILCD 1.0.8 2016 midpoint', 'ecosystem quality', 'freshwater and terrestrial acidification')	0.0744	0.0133	0.00087	mol H+-Eq
[C351]	('ILCD 1.0.8 2016 midpoint', 'human health', 'respiratory effects, inorganics')	0.00712	0.00275	4.31e-05	kg PM2.5-Eq
[C341]	('ILCD 1.0.8 2016 midpoint', 'ecosystem quality', 'freshwater ecotoxicity')	918	92.9	1.05	CTUh.m3.yr
[C347]	('ILCD 1.0.8 2016 midpoint', 'human health', 'ionising radiation')	0.297	0.0903	0.0415	kg U235-Eq
[C350]	('ILCD 1.0.8 2016 midpoint', 'human health', 'photochemical ozone creation')	0.0232	0.00979	0.000638	kg ethylene-Eq
[C345]	('ILCD 1.0.8 2016 midpoint', 'ecosystem quality', 'terrestrial eutrophication')	0.108	0.0264	0.00252	mol N-Eq
[C342]	('ILCD 1.0.8 2016 midpoint', 'ecosystem quality', 'freshwater eutrophication')	0.0229	0.0026	5.92e-05	kg P-Eq
[C344]	('ILCD 1.0.8 2016 midpoint', 'ecosystem quality', 'marine eutrophication')	0.213	0.00241	0.000226	kg N-Eq
[C353]	('ILCD 1.0.8 2016 midpoint', 'resources', 'mineral, fossils and renewables')	0.00406	0.000164	1.13e-06	kg Sb-Eq
[C721]	ADPminerals, 2015	0.0295	0.000447	1.76e-06	kg Sb-Eq
[C728]	ADPfossils	25.2	31.8	10.8	megajoule

## Sheet: Normalisation totals
World 1999 normalisatie		World, 1999 (often called 'World, 2000')
[C339]	('ILCD 1.0.8 2016 midpoint', 'climate change', 'GWP 100a')	43000000000000	kg CO2-Eq/yr
[C349]	('ILCD 1.0.8 2016 midpoint', 'human health', 'ozone layer depletion')	120000000	kg CFC-11-Eq/yr
[C346]	('ILCD 1.0.8 2016 midpoint', 'human health', 'carcinogenic effects')	404000	CTUh/yr
[C348]	('ILCD 1.0.8 2016 midpoint', 'human health', 'non-carcinogenic effects')	29700000	CTUh/yr
[C340]	('ILCD 1.0.8 2016 midpoint', 'ecosystem quality', 'freshwater and terrestrial acidification')	303000000000	mol H+-Eq/yr
[C351]	('ILCD 1.0.8 2016 midpoint', 'human health', 'respiratory effects, inorganics')	39300000000	kg PM2.5-Eq/yr
[C341]	('ILCD 1.0.8 2016 midpoint', 'ecosystem quality', 'freshwater ecotoxicity')	29900000000000	CTUh.m3.yr/yr
[C347]	('ILCD 1.0.8 2016 midpoint', 'human health', 'ionising radiation')	85200000	kg U235-Eq/yr
[C350]	('ILCD 1.0.8 2016 midpoint', 'human health', 'photochemical ozone creation')	297000000000	kg ethylene-Eq/yr
[C345]	('ILCD 1.0.8 2016 midpoint', 'ecosystem quality', 'terrestrial eutrophication')	701000000000	mol N-Eq/yr
[C342]	('ILCD 1.0.8 2016 midpoint', 'ecosystem quality', 'freshwater eutrophication')	15000000000	kg P-Eq/yr
[C344]	('ILCD 1.0.8 2016 midpoint', 'ecosystem quality', 'marine eutrophication')	71100000000	kg N-Eq/yr
[C353]	('ILCD 1.0.8 2016 midpoint', 'resources', 'mineral, fossils and renewables')	306000000	kg Sb-Eq/yr
Normalization totals for (using new ICMM 2010 P-values for normalization):		Calculated in "coverage_test.xlslx		Coverage
[C720]	ADP2015 NEW * P2010,world NEW	5.74353e+09	kg Sb-Eq/yr	74	Calculated using the ADP2015 from this work and the Productionworld,2010 data from this work
[C720]	ADP2015 New * P2010,EU27 JRC	8.47527e+07	kg Sb-Eq/yr	34	Calculated using the ADP2015 from this work and the ProductionEU27,2010 data from 'Sala S, Benini L, Mancini L, Pant R (2015) Integrated assessment of environmental impact of Europe in 2010: data sources and extrapolation strategies for calculating normalisation factors. Int J Life Cycle Assess 20:1568–1585'.
[C728]	ADPfossils * Pworld	380000000000000	MJ/yr		Source: CML-IE CML-IA Characterisation Factors. In: C. Characterisation Factors. https://www.universiteitleiden.nl/en/research/research-output/science/cml-ia-characterisation-factors
	ADPfossils * P2010,EU27 JRC (excluding Uranium!!)	17090697000000	MJ/yr		Scurce: 'Sala S, Benini L, Mancini L, Pant R (2015) Integrated assessment of environmental impact of Europe in 2010: data sources and extrapolation strategies for calculating normalisation factors. Int J Life Cycle Assess 20:1568–1585'. Corrected for Uranium.
EU27 (PEF normalisatie), 2010
		EU15+3 normalisation
	Unit	DOMESTIC
('ILCD 1.0.8 2016 midpoint', 'climate change', 'GWP 100a')	kg CO2-Eq/yr	4600000000000
('ILCD 1.0.8 2016 midpoint', 'human health', 'ozone layer depletion')	kg CFC-11-Eq/yr	10800000
('ILCD 1.0.8 2016 midpoint', 'human health', 'carcinogenic effects')	CTUh/yr	18400
('ILCD 1.0.8 2016 midpoint', 'human health', 'non-carcinogenic effects')	CTUh/yr	266000
('ILCD 1.0.8 2016 midpoint', 'ecosystem quality', 'freshwater and terrestrial acidification')	mol H+-Eq/yr	23600000000
('ILCD 1.0.8 2016 midpoint', 'human health', 'respiratory effects, inorganics')	kg PM2.5-Eq/yr	1900000000
('ILCD 1.0.8 2016 midpoint', 'ecosystem quality', 'freshwater ecotoxicity')	CTUh.m3.yr/yr	4360000000000
('ILCD 1.0.8 2016 midpoint', 'human health', 'photochemical ozone creation')	kg ethylene-Eq/yr	15800000000
('ILCD 1.0.8 2016 midpoint', 'ecosystem quality', 'terrestrial eutrophication')	mol N-Eq/yr	87600000000
('ILCD 1.0.8 2016 midpoint', 'ecosystem quality', 'freshwater eutrophication')	kg P-Eq/yr	741000000
('ILCD 1.0.8 2016 midpoint', 'ecosystem quality', 'marine eutrophication')	kg N-Eq/yr	8440000000
('ILCD 1.0.8 2016 midpoint', 'resources', 'mineral, fossils and renewables')	kg Sb-Eq/yr	50300000
	JRC World 2010				CML waarden	MJ/kg	MJ/m3	ADP (LCA Handbook, 2002)		ADP (Sb eq/kg)	ADP (Sb eq/m3)	P (kg/yr; EU;2010)	P (MJ/yr; spreadsheet JRC)	energy content (MJ/kg)
	natural gas	38.84	MJ/kg	m3	Coal, hard, unspecified, in ground	27.91		coal hard	kg	0.0134		1.16067e+11	3052560000000	26.3
	hard coal	27.91	MJ/kg		Coal, brown, in ground	13.96		coal soft, lignite	kg	0.00671		3.05849e+11	3639600000000	11.9
	brown coal	13.96	MJ/kg					coal mixed	kg	0.010055
	peat	17.7	MJ/kg					Uranium	kg	0.0013982		33600000	182879424000	5442.84
	crude oil	41.87	MJ/kg		Gas, natural, in ground	54.609	38.84	natural gas	kg	0.0262922	0.0187	1.48285e+11	6539359000000	44.1
	Uranium	544284	MJ/kg		Oil, crude, in ground	41.87		oil crude	kg	0.0201		8.81403e+10	3728335000000	42.3
	1 kilogram (kg) of natural gas	1.406	m3		Peat, in ground	17.7		peat; 8.4 MJ/kg				1.55765e+10	130843000000	8.4
													17273576424000

## Sheet: Normalisation results
Normalisation results for (using new ICMM 2010 P-values for normalization):
ADP2015 NEW * P2010,world NEW	5.13621e-12	7.78266e-14	3.06432e-16	year
ADP2015 New * P2010,EU27 JRC	3.48071e-10	5.27417e-12	2.07663e-14	year
ADPfossils * Pworld	6.63158e-14	8.36842e-14	2.84211e-14	year
ADPfossils * P2010,EU27 JRC (excluding Uranium!!)	1.47449e-12	1.86066e-12	6.31923e-13	year
The results for the PEF impact category "human health, ionising radiation" have been excluded from the results as the normalisation results for this category shows biased results of 2-5 orders of magnitude off from the normalisation results of other impact categories!
ADPminerals,2015; normalisation world 2010	[A1] Output of [G5796] copper_copper production, primary[RER]		[A3] Output of [G6049] electricity, high voltage_electricity, high voltage, production mix[NL]	Unit
resources, fossil energy carriers	6.63158e-14		2.84211e-14	year
resources, minerals	5.13621e-12		3.06432e-16	year
climate change	4.25581e-14		1.40698e-14	year
ozone layer depletion	1.35833e-15		2.61667e-16	year
human health, carcinogenic effects	3.81188e-12		2.47525e-14	year
human health, non-carcinogenic effects	1.3771e-12		1.48148e-15	year
freshwater and terrestrial acidification	2.45545e-13		2.87129e-15	year
respiratory effects, inorganics	1.8117e-13		1.09669e-15	year
freshwater ecotoxicity	3.07023e-11		3.51171e-14	year
photochemical ozone creation	7.81145e-14		2.14815e-15	year
terrestrial eutrophication	1.54066e-13		3.59486e-15	year
freshwater eutrophication	1.52667e-12		3.94667e-15	year
marine eutrophication	2.99578e-12		3.17862e-15
ADPminerals,2015; normalisation EU27 2010	[A1] Output of [G5796] copper_copper production, primary[RER]		[A3] Output of [G6049] electricity, high voltage_electricity, high voltage, production mix[NL]	Unit		Copper
resources, fossil energy carriers	1.47449e-12		6.31923e-13	year
resources, minerals	3.48071e-10		2.07663e-14	year
climate change	3.97826e-13		1.31522e-13	year
ozone layer depletion	1.50926e-14		2.90741e-15	year
human health, carcinogenic effects	8.36957e-11		5.43478e-13	year
human health, non-carcinogenic effects	1.53759e-10		1.65414e-13	year
freshwater and terrestrial acidification	3.15254e-12		3.68644e-14	year
respiratory effects, inorganics	3.74737e-12		2.26842e-14	year
freshwater ecotoxicity	2.1055e-10		2.40826e-13	year
photochemical ozone creation	1.87975e-11		2.62658e-12	year
terrestrial eutrophication	2.6484e-13		7.28311e-15	year
freshwater eutrophication	1.45749e-10		3.40081e-12	year
marine eutrophication	2.71327e-12		7.01422e-15	year
