# Supplementary material for: Abiotic resource depletion potentials (ADPs) for elements revisited—updating ultimate reserve estimates and introducing time series for production data
Source: Springer Nature journal article supplement (doi:10.1007/s11367-019-01683-x), 2019-10-16
Supplement: MOESM4 [file 17280868]

**Appendix A**

In the text it was argued that a typical functional unit should show normalized indicator results for the different impact categories in the same order of magnitude. In this appendix, we provide a proof for this.

The normalized category result of impact category for a product is given as

where product ’s category result for impact category is

and the category total for impact category is

Here, is the characterization factor of emission/resource type for impact category .

Suppose there are products, and there are copies of product . Then the total emission/resource use of type by all products is

Therefore, the normalized category result of impact category for a product can be written as

This can also be written as

A typical product has emission/resources use of type given by

As a consequence, its impact on category is

and its normalised impact on category is

This can be rewritten as

This result () is independent of the impact category, . So has a constant value, independent of .

**Appendix B**

In the text it was argued that the choice of the reference substance is irrelevant in the final results, comparable to the choice between kilogram and pound. In particular, we argue the following:

a) in a comparative LCA, product rankings are independent of the reference substance;

b) the share of different elements in the category total is independent of the reference substance.

Ad a) Suppose we have products, numbered and . Their resource consumptions of resource are and , so their depletion category indicator results are

and

The ratio of these two scores is

Using the definition of the ADP,

this can be rewritten as

We can simplify this by taking out all terms with :

This last expression doesn’t contain any term that depends on . This proves that the ratio of the scores of any two products, and , does not depend on the choice of the reference substance. If we choose for the ADP a slightly different formula, for instance with the moving average or cumulative production, this conclusion remains valid as long as we do this consistently for every resource, including the reference resource.

Ad b) The share of resource in the category total is

Because

we can rewrite this as

We can simplify this by taking out all terms with :

This last expression doesn’t contain any term that depends on . This proves that the share of a resource in the category total does not depend on the choice of the reference substance. If we choose for the ADP a slightly different formula, for instance with the moving average or cumulative production, this conclusion remains valid as long as we do this consistently for every resource, including the reference resource.
